# Supplementary material
Source: publisher site journal article supplement (https://www.dovepress.com/article/514133)
Supplement: Supplementary file 1 [file 514133-Revised-Supplementary-Material.docx]

**e-Figure 1: Classification of the AEs related to bupropion.**

**
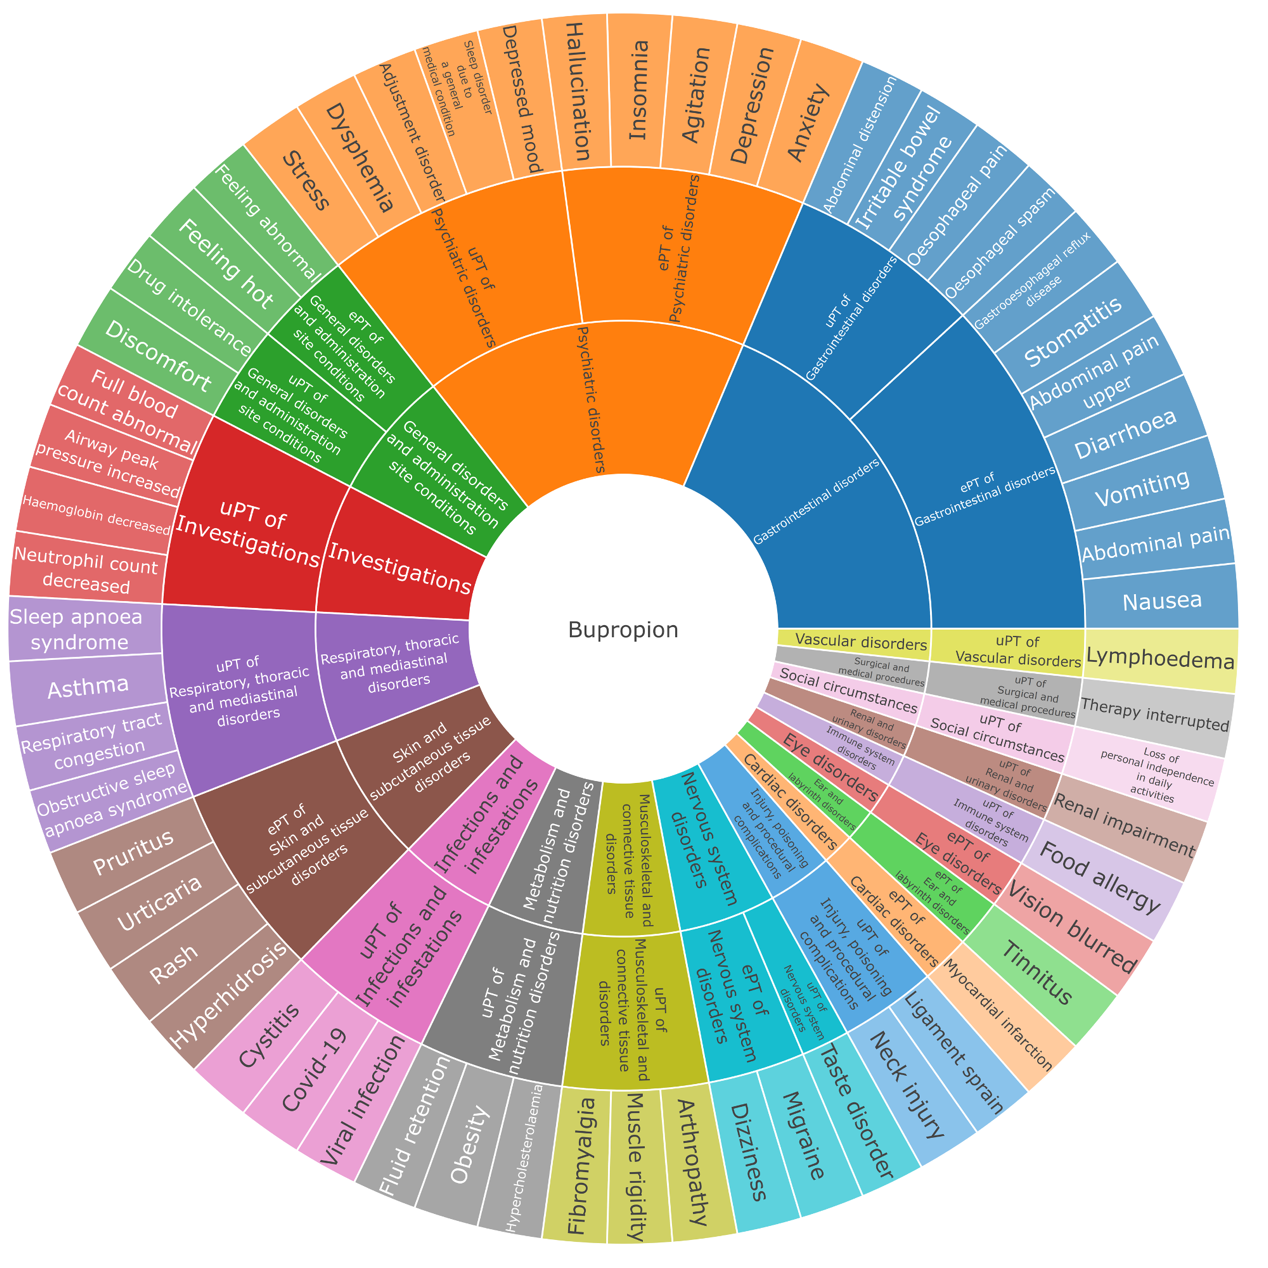
**

**e-Figure 2: Classification of the AEs related to nicotine.**

**
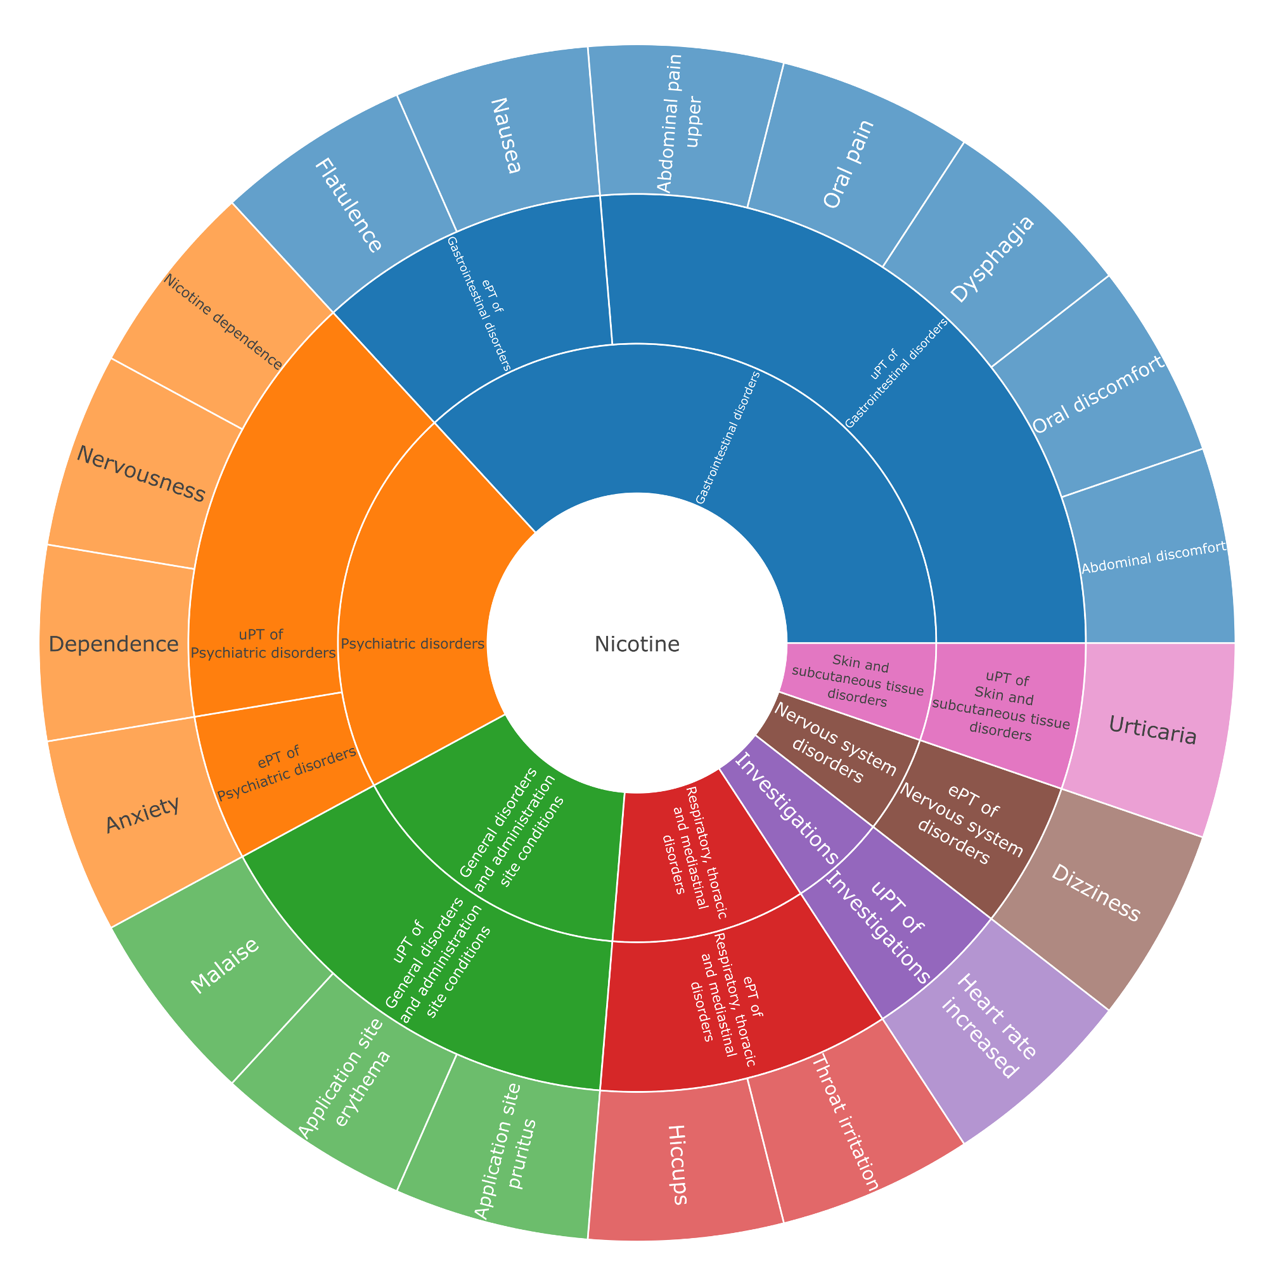
**

**e-Figure 3: Classification of the AEs related to varenicline.**

**
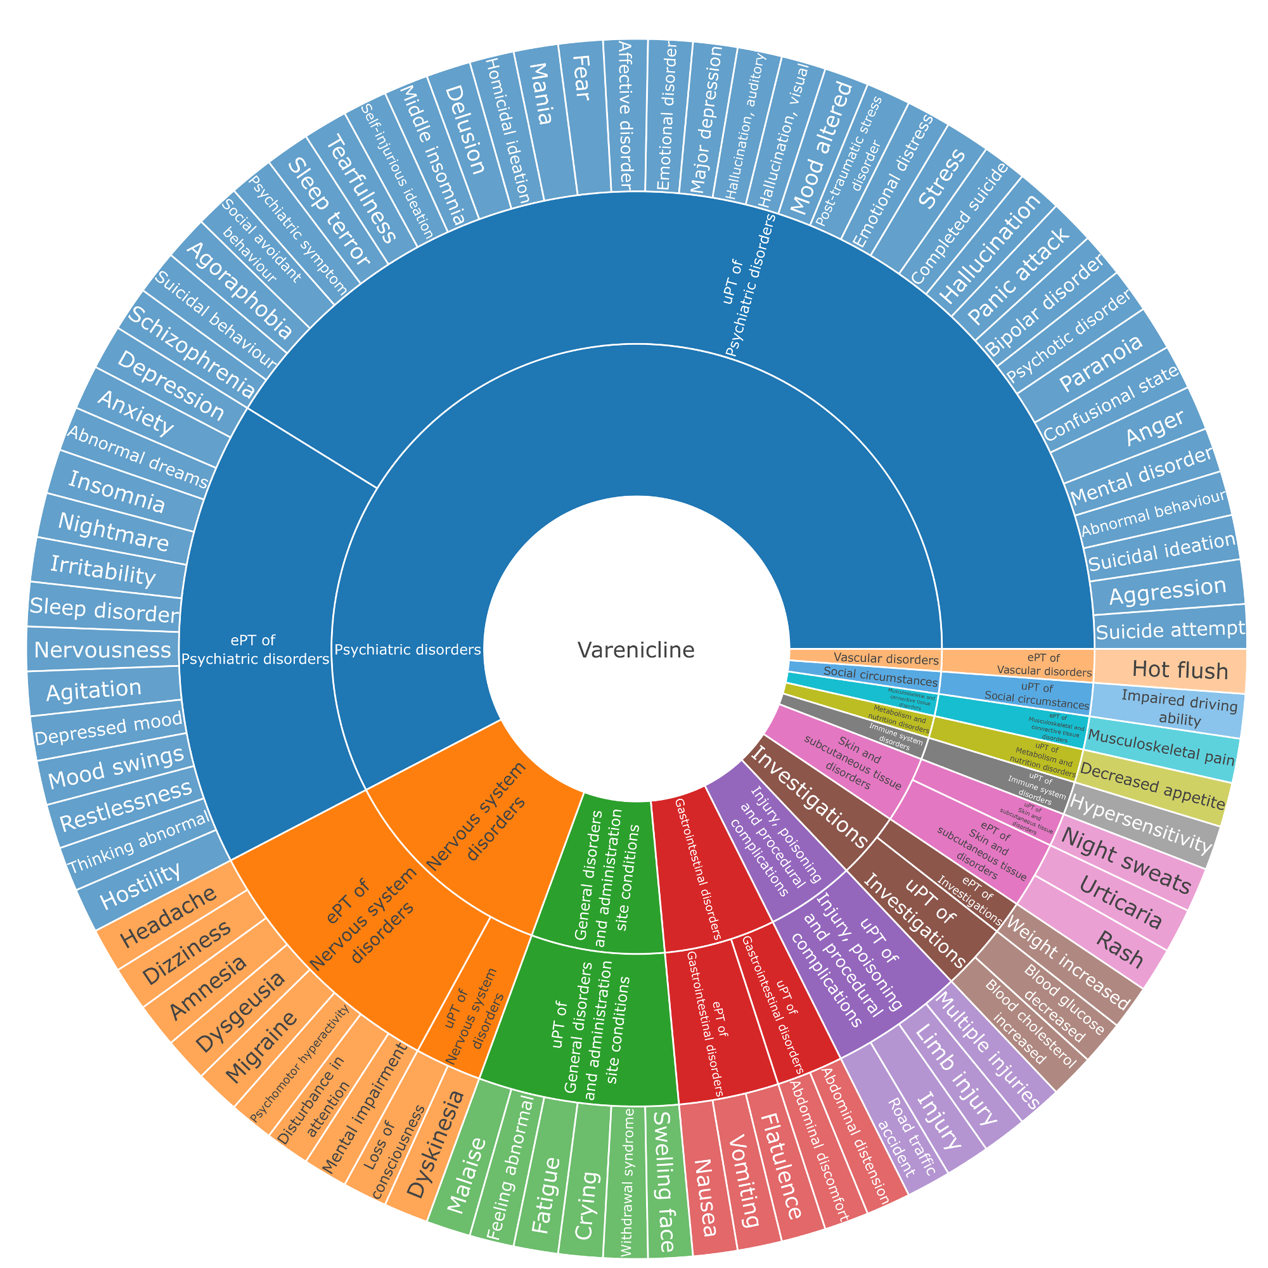
**

**e-Figure 4: Heatmap depicting 149 AEs associated with bupropion, nicotine and varenicline in the FAERS database across diverse categories (AE, adverse event; Important Medical Event, ime).**

**
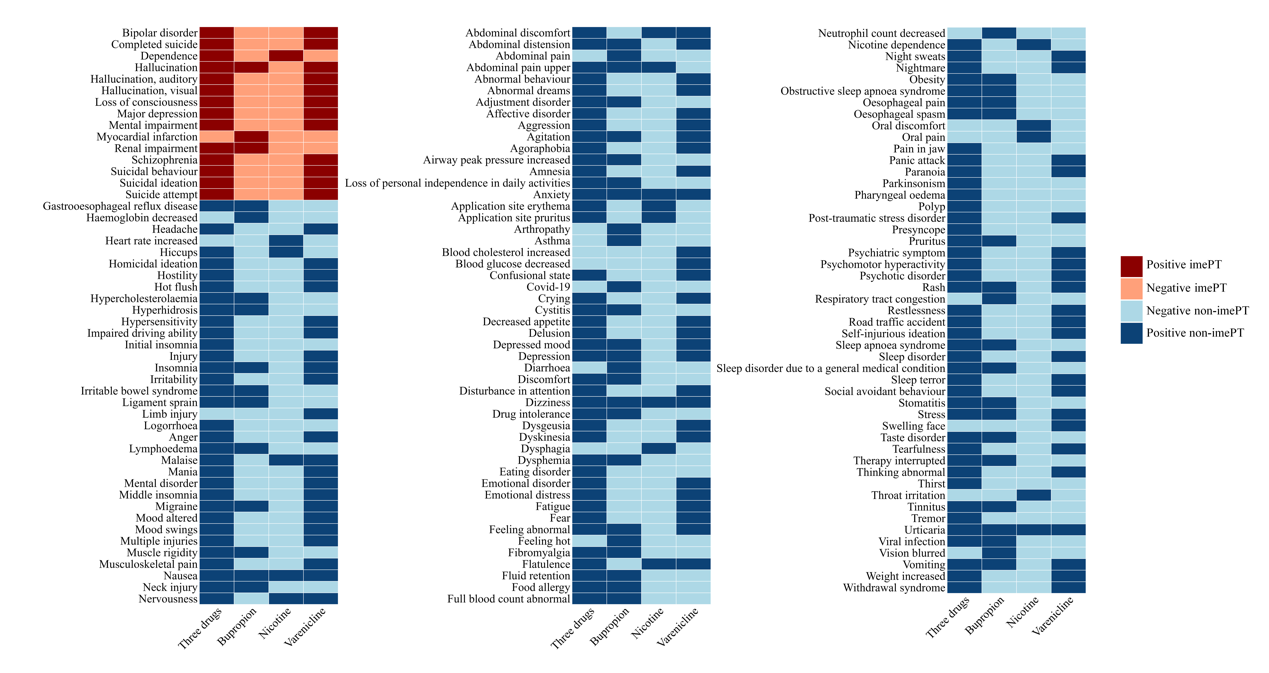
**

**e-Figure 5: The reporting odds ratios of the top 10 AEs related to target drugs in the male and female subgroups. (A) Top 10 positive adverse events associated with three drugs in male patients. (B) Top 10 positive adverse events associated with three drugs in female patients. (C) 6 positive adverse events associated with nicotine in male patients. (D) 7 positive adverse events associated with nicotine in female patients. (E) Top 10 positive adverse events associated with varenicline in male patients. (F) Top 10 positive adverse events associated with varenicline in female patients. (G) Top 10 positive adverse events associated with bupropion in male patients. (H) Top 10 positive adverse events associated with bupropion in female patients.
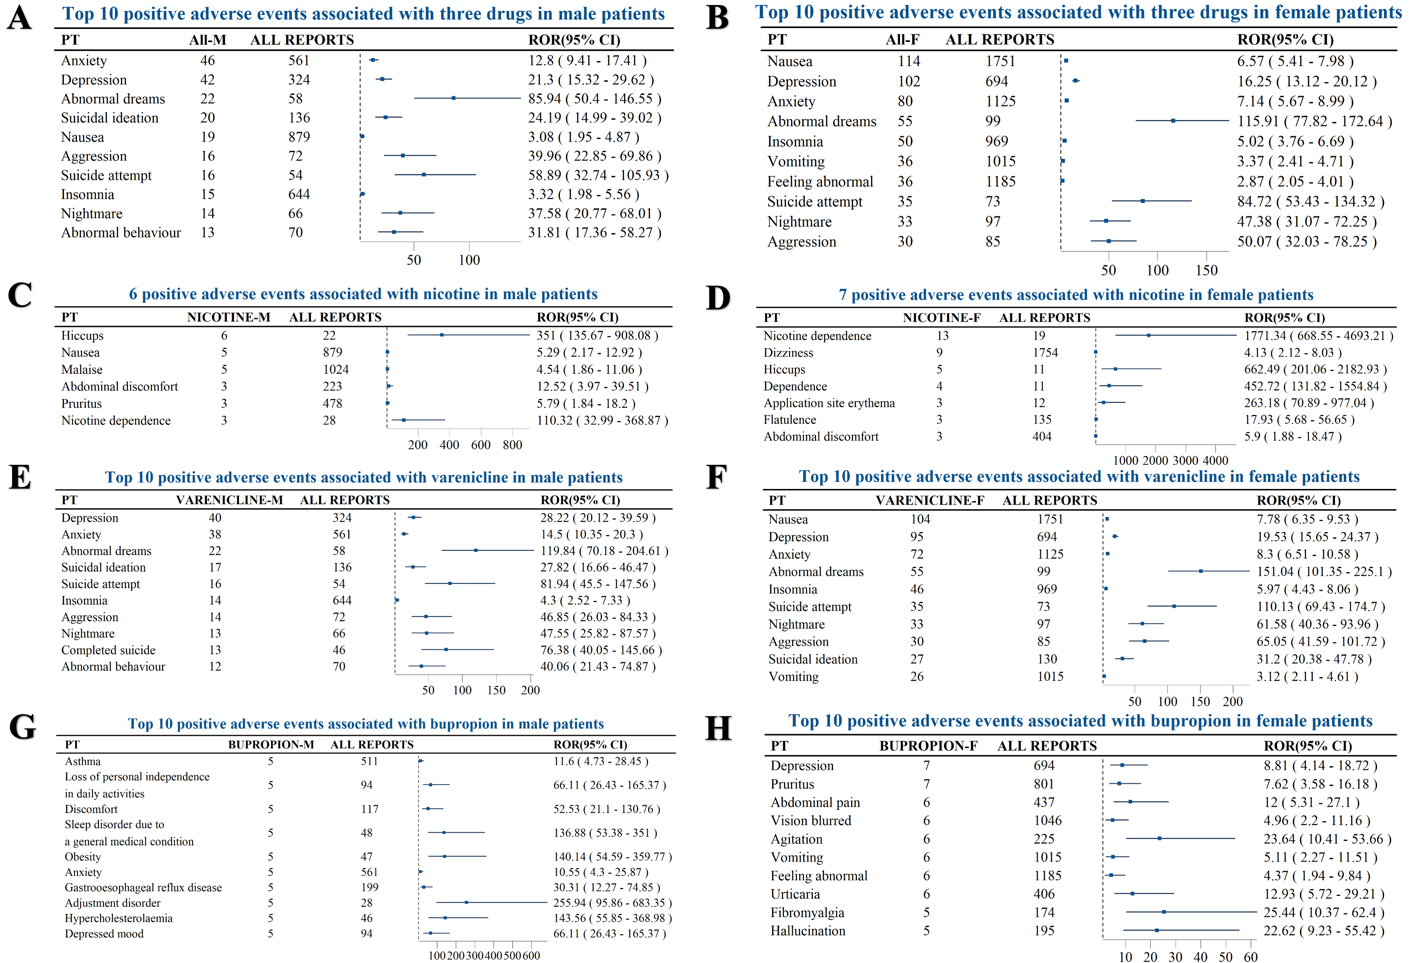
**

**e-Figure 6: Summary box diagram illustrating the quantitative relationship between comorbidities and adverse events (AEs) in (A) Three drugs, (B)** **bupropion, (C) varenicline and (D) nicotine.
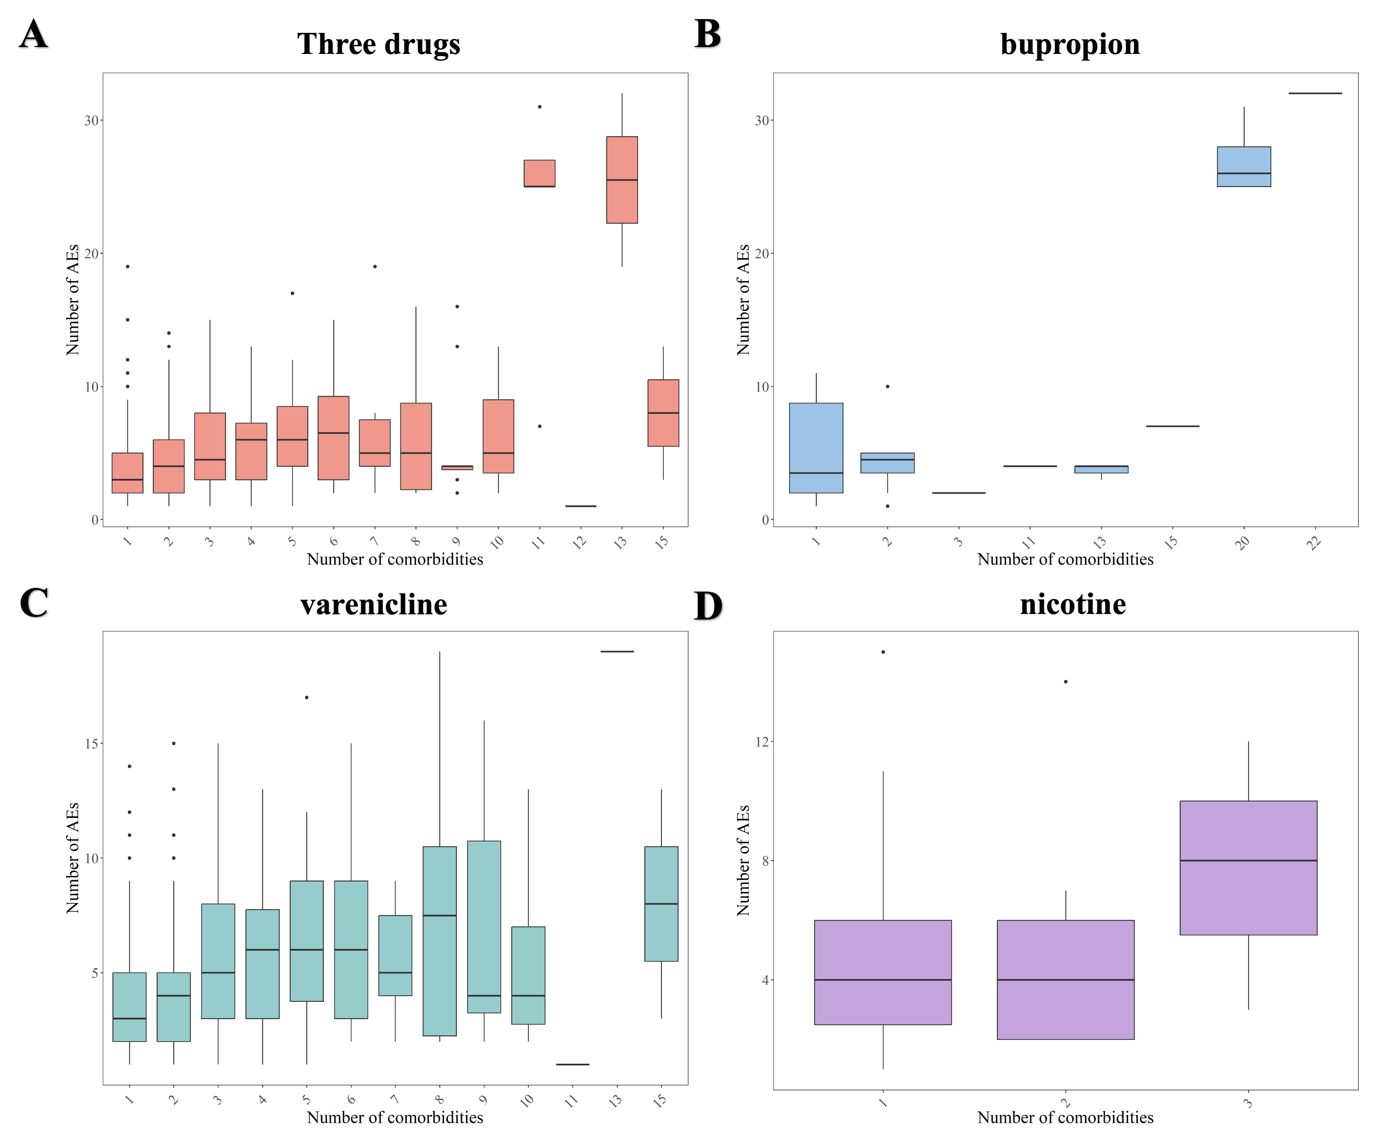
**

**e-Supplementary material 1: Query glossary for bupropion, nicotine and varenicline**

**drug name: nicotine**

NICOTINE ; NICOTINE; NICOTROL INHALER; NICOTINE GUM; NICOTINE PATCH; NICORETTE NICOTINE POLACRILEX CHERRY LOZENGE 4MG; NICOTINELL TTS 30; NICOTINELL; NICOTINE NONE ; NICOTINELL GUM; NICOTINELL TTS; NICOPASS NICOTINE; NICOTROL NASAL SPRAY; GUM NICOTINELL MINT NICOTINE ; NICODERM CQ; NICOTROL; HABITROL; NICORETTE NICOTINE POLACRILEX ; NICOTINELL CHEWING GUM MINT; NICOTINE POLACRILEX 4MG MINT COATED 532; NICOTINE LOZENGE; NICOTINE TRANSDERMAL PATCH NICOTIINE ; NICOTINE POLACRILEX; NICORETTE; PRIVATE LABEL; NICOTINE PATCH UNSPECIFIED ; NICOTINE NICOTINE ; NICOTINE INHLAER; NICORETTE NICOTINE POLACRILEX LOZENGE 4MG; NICOPATCH; NICOTINE LOZENGES; PRIVATE LABEL STEP 2 14MG ACCT UNKNOWN; NICOTINE PATCH NICOTINE ; NIACIN NICOTINE ACID ; NICOTINE TRANSDERMAL SYSTEM; NICOTINE PATCHES; NICOTINE POLACRILEX GUM; NICOTINELL KAUGUMMI; NICODERM NICOTINE ; NICOTINELL COATED GUM 2 MG MINT; NICORETTE NICOTINE ; NICOTINELL TTS 10; CONTROL STEP 2 14MG; PRIVATE LABEL STEP 1 21MG ACCT UNKNOWN; THRIVE GUM UNKNOWN; CVS NICOTINE; NIQUITIN; NICOTINELL NICOTINE; NICOTINE REPLACEMENT THERAPY; CONTROL STEP 1 21MG; NICOTINE POLACRILEX REGULAR WATSON LABORATORIES ; NICOTINELL FRUIT NICOTINE GUM; NICOTINE CINNAMON SURGE OTC 4MG; NICOPASS; NICOTINE RESIN; PRIVATE LABEL STRENGTH UNKNOWN; NICOTINE WATSON LABORATORIES ; COMMIT; WALGREENS LOZENGE ORIGINAL 4 MG; NICOTINE TRANSDERMAL SYSTEM STEP 1; NICORETTE PFLASTER; BOOTS NICASSIST; CONTROL STEP 3 7 MG; PRIVATE LABEL STEP 3 7MG ACCT UNKNOWN; NICODERM STEP 3 CLEAR; NICOPASS NICOTINE ; NICORETTESKIN NICOTINE ; NRT GUM; NRT INHALER; NICOTINE REPLACEMENT THERAPY UNSPECIFIED; K MART STEP 1 21 MG 14; CIGARETTES; NICOTINELL COATED GUM LIQUIRICE; RITEAID STEP 1 21MG; HABITROL 01033301 NICOTINE ; THRIVE; DRUGS USED IN NICOTINE DEPENDENCE; CVS NTS STEP 1 NICOTINE ; NICOTINE DERMAL PATCH; NICOTINE TRANSDERMAL SYSTEM STEP 2; LOZENGE; NICOTINE ; NICABATE; NICORETTE ORIGINAL; NICOTINE UNKNOWN BRAND; NICORETTE FRESH MINT; KROGER STEP 1 21 MG; NICOTINE UNKNOWN BRAND MEDICATED CHEWING GUM; EQUATE NICOTINE; NICORETTE FRUIT CHILL; TARGET NTS CLEAR 21 MG TRANSDERMAL PATCH; RITE AID NICOTINE TRANSDERMAL SYSTEM STEP 2; WALGREEN NICOTINE; NICOTINE TRANSDERMAL PATCH; NICOTINE POLACRILEX STOP SMOKING AID; NICOTINELL 01033301 ; NICOTINE MEDICATED CHEWING GUM; NICORETTE QUICKMIST; NICOTINELL PLACEBO GUM; NICODERM CQ NICOTINE POULTICE OR PATCH ; NICORETTE NICOTINE; VITAMIN B COMPLEX WITH C ASCORBIC ACID CALCIUM PANTOTHENATE CYANOCOBALAMIN NICOTINEAMIDE PYRIDOXINE HYDROCHLORIDE RIBOFLAVIN THIAMINE MONONITRATE ; NICOTINELL 01033303 ; NICOTINE UNKNOWN BRAND TRANSDERMAL PATCH; TARGET NTS 14MG TRANSDERMAL PATCH; NICORETTE NICOTINE POLACRILEX CHERRY LOZENGE 4MG LOZENGE; NICOTINE TRANSERMAL PATCH; WALGREENS NICOTINE TRANSDERMAL SYSTEM PATCH CLEAR; NICOTINE TRANSDERMAL SYSTEM PATCH KIT; NICOTINE HABITROL ; QUITX GUM; WALGREENS NICOTINE TRANSDERMAL SYSTEM PATCH CLEAR 7MG TRANSDERMAL PAT; NICORETTE WHITE ICE MINT; ELECTRONIC CIGARETTE NICOTINE ; NICOTINE UNKNOWN BRAND INHALATIONAL POWDER; KROGER NICOTINE; NICOTINE UNKNOWN BRAND LOZENGE; NICORETTE MINT; TARGET NICOTINE; NICOTINE UNKNOWN BRAND COMPRESSED LOZENGE; NICOTINE CIGARETTES ; NICORETTE CINNAMON SURGE; WALGREENS NICOTINE TRANSDERMAL SYSTEM PATCH CLEAR 7MG; NICOTINE TRANSDERMAL; NICODERM NICOTINE NICOTINE ; EQUATE NICOTINE LOZENGES; SIMPLY RIGHT CLEAR 21 MG; ELECTRONIC CIGARETTE; TRANSDERMAL NICOTINE; NICOTINE GUM MEDICATED CHEWING GUM; NICOTINE 01033302 ; UP AND UP NICOTINE; NICOTINE PATCH TRANSDERMAL PATCH; NICOTINE GUM 4MG UNKNOWN BRAND MEDICATED CHEWING GUM; NICOTINE GUM UNKNOWN STRENGTH UNKNOWN BRAND; MEMBERS MARK NICOTINE; NICOTINE LOZENGE LOZENGE; SIMPLY RIGHT NICOTINE; NICOTINE PATCH UNKNOWN BRAND TRANSDERMAL PATCH; MISCELLANEOUS NRT PRODUCTS TRANSDERMAL PATCH; NICOTINE GUM UNKNOWN STRENGTH UNKNOWN BRAND MEDICATED CHEWING GUM; NICOTINE INHALER; NICOTINE PATCH TRANSDERMAL PATCH; NICOTINE POLACRILEX COMPRESSED LOZENGE; PRIVATE LABEL LOZENGE UNKNOWN BRAND STRENGTH LOZENGE; NICOTINE NCH NICOTINE ; NICOTINE GUMS; CIGANON; NICOTINE TDM; NICOTINE STRIPS; NICORETTE INVISI; QUITX; NICODERM CQ NICOTINE ; THRIVE 2 MG; NICOTINE PATCHES 14 MG; NICOTINE PROLOCRILEX GUM; E CIGARETTE; NICOTINE UNKNOWN ; NICOTINE POLACRILEX GUM; EXODUS NICOTINE; NICORETTE QUICKMIST MOUTHSPRAY; NICABATE CQ; NICOTINE MINI MINT 4 MG 957; NICOTINE GUM 4MG UNKNOWN BRAND; NICOTINE POLACRILEX W NICOTINE; BLINDED NICOTINE; NICOTINE 4 MG MINT 873; NICOTINE BITARTRATE; NIQUITIN NICOTINE NICOTINE RESINATE ; NICOTINE 2 MG MINT 344; NICOTINE 12063 0068 2 MG; GENERIC NICOTINE PATCH; NICOTINE 4MG GUM; NICOTINE PATCH ; NICOTINE TD DIS; NICOTINE BUCCAL; NICOTINE POLACRILEX COATED MINT FLAVOR; NICOTINE POLACRILEX COATED FRUIT FLAVOR; NICOTINE LOZ; E LIQUIDS FOR ELECTRONIC CIGARETTES; NICORETTE NICOTINE BITARTRATE; NICOTINE SPRAY; NICOTINE MINI; NICOTINE TRANSDERMAL SYSTEM 21 MG DAY; NICOTINE GUM 2MG UNKNOWN BRAND MEDICATED CHEWING GUM; CIGANON CLEAR1; NICOTINE EXTENDED RELEASE TRANSDERMAL FILM; NICOTINE RESINATE; NICOTINE PLASTER; NICOTINE POLACRILEX NICORETTE ; NICORELIEF; NICOTINE STOP SMOKING AID; TRANSDERMAL NICOTINE REPLACEMENT THERAPY PATCH; NICOTINE IMPREGNATED PAD; NICOTINE ACTAVIS LABORATORIES NY INC ; CIGANON CQ; NICOTEX 4 MG CIPLA; HABITROL PATCH NICOTINE TRANSDERMAL SYSTEM STEP 1; NICOTINE 14MG 24HRS RUDBY; VAPE PEN NICOTINE ; NICOTINE POL GUM; NICOTINE MINTS; VAPORIZER PIPE FLAVORED NICOTINE; BLINDED NICOTINE; THRIVE NICOTINE BITARTRATE; LIQUID NICOTINE VAPOR UP; NICOTROL NS; NICOTINE GUM ORAL GUM; NICOTINE TD; NICOTINE DS; NICOTINE NICODERM CQ; NICO 2 MG GUM ROM DUAN READ; NICOTINE NICOTINE POLACRILEX ORAL GUM; NICOTINE MINI LOZENGES; NICOTINE STEP 2; NICOTINE NICORETTE ; NICOTINE TRANSDERMAL NICRODERM 14MG ; NICOTINE 01033302 ; NICOTINE STEP; GUARDIAN NICOTINE PATCHES; NICOTINELL PATCH; NICOTINE 2MG GUM; NICOTINE STEP 3; ZONNIC; TRANSDERMAL NICOTINE PATCH; NICOTINE TRANSDERMAL SYSTEM 7 MG DAY; NICOTINE PT2; NICOTINE NASAL SPRAY; NICOTINE TABLETS; NICOTINE PATCH 21 MG; NICOTINE STEP 1; NICOTINE TRANSDERMAL SYSTEM STEP 3; NICOTINELL 14 MG; NICOTINELL MINT 01033301 ; ELECTRONIC CIGARETTE BRAND UNKNOWN; NICOTINE REPLACEMENT GUM; EQ NICOTINE GUM COATED ICE MINT 2MG 100CT C2 NICORETTE ; EQ NICOTINE GUM COATED ICE MINT 4MG 100CT C2 NICORETTE ; EQ NICOTINE GUM C2 NICORETTE ; NICOTINELL 20; NICOTINE NICODERM CQ ; QUITEX; NICOTIN; EQUATE NICOTINE TRANSDERMAL PATCH; NICORETTE SPEARMINT BURST; INHALE HEALTH VITAMIN B COMPLEX MULTIVITAMIN ZERO NICOTINE ORGANIC BASE; NICOTINE MINT GUM; EXODUS 01033301 ; NICOTINE ANTI SMOKING FLAVOR; NICOTINE TRANSDERMAL 14 MG PATCH; NICOTINE 21 MG TRANSDERMAL PATCHES; NICOTINE CLEAR PATCHES; NICOTINE TRANSDERMAL PATCHES; NICOTINE CHEWING GUM; NICOTINE INHALATION POWDER; EQ NICOTINE; NICOTINE PRODUCT; NICOTENE; NICOTGUM A; NICOTINE COATED MINT; NICOTINE HYDROCO APAP PRAZOSIN; KROGER NICOTINE PATCH; HABITROL GUM ORAL GUM; HABITROL PATCH NICOTINE TRANSDERMAL SYSTEM STEP 2; HABITROL PATCH NICOTINE TRANSDERMAL SYSTEM STEP 3; TRANSDERMAL NICOTINE PATCH UNKNOWN STRENGTH; NICOTINEL; NICOTINE ICE MINT; NICOTINE GUM P; NICOTINE GUM AND PATCHES; KIRKLAND SIGNATURE QUIT 2; NICOTINE NICOTINE POLACRILEX ; NICOTINE 14MG DAY PATCH; NICOTINE 21MG 24HR PATCH; NICOTINE POLACRILEX 2MG LOZENGE; NICOTINE 7MG PATCH; NICOTINE PLEISTER 7MG 24UUR NICOTINEL NICOPATCH TRANSDERML; NICOTINE LOZENGE 2MG PLACEBO; UP AND UP NICOTINE POLACRILEX; NICOTINE POLACRIX; NICOTINE CAOTED FRUIT GUM; NICOTINE MINT FLAVOR; ZONNIC NICOTINE; NICOTINE REPLACEMENT; NICORETTE NICOTINATE RESINATE ; NICOTINE 21MG TD PATCH; NICOTINE GUM OR LOZENGES; NICOTINE TABLET; NICCOTINE PATCH 21MG 24H; NICOTINE ORAL GUM 4MG MEDICATED CHEWING GUM; NICOTROL CARTRIDGE; NICOTINE BETA CYCLODEXTRIN ; NICOTINELL NICOTINE POLACRILEX ; ABILIFY TYLENOL NICOTINE POL MILK OF MAGN IPRATROPIUM ; CLEAR NICOTINE PATCH; RA NICOTINE; NICOTINE NICOTINE BITARTRATE NICOTINE POLACRILEX; NICOTINE BETADEX; PLATINUM AND DANK BRAND MARIJUANA CARTRIDGES VAPE THC NICOTINE ; MULTIPLE STRENGTHS OF THE NICOTINE PATCH; NICOTROL NASAL; LOZENGES 2 MG NICOTINE ; NICOTINELL PEPPERMINT NICOTINE POLACRILEX ; NIQUITIN MENTA; THRIVE NICOTINE BITARTRATE ; NICOTINE TRANSDERMAL FILM; NICOTINE TD PATCH; EXODUS NICOTINE ; NICOTINE 21MG 24HR TRANSDERMAL PATCH TOPICALLY; NICOTINEPLEISTER; NICOTINE PATCH 21 MG TD; NICOPATCHLIB; NAPROXEN NICOTINE POLACRILEX ; NICOTINE POL LOZ; JUUL DEVICE NICOTINE ; NICOTINE UNKNOWN BRAND INHALATION POWDER; KRO NICOTINE; DANK VAPES CHRONIC CARTS FLAVORS SOUR PATCH FRUITY PEBBLES 24 K; JUUL MINT POD; HQD CUVIE BLUEBERRY FLAVOR; NICOTINE PATCH 21MG; PURE MICHIGAN MASTER E LIQUID 12G NICOTINE ; VOODOO DEVICE NICOTINE ; MR VAPOR RAINBOW DROPS DEVICE NICOTINE ; 8 MILE DEVICE NICOTINE ; NJOY VAPE ACE PODS BLUEBERRY DEVICE NICOTINE ; NICOTINE POSH CALIPODS; NEWPORT NON MENTHOL 100S; TASTE VAPORS NICOTINE E LIQUIDS; SOURIN AIR LIQUID NICOTINE ; NJOY WITH BLUEBERRY MINT FLAVORS DEVICE NICOTINE ; JUUL MINT FLAVOR ONLY; THC NICOTINE VAPE CARTRIDGE; JUUL ; TKO VAPOR E CIGS ; NIC NICOTINE SALTS E LIQUIDS IN A SQUEEZE BOTTLE ; RED BRAND WATERMELON FLAVORED 50MG STRENGTH NICOTINE ; THIRD GENERATION E CIGARETTES OR VAPES WITH A REFILLABLE TANK WITH A; FLAIR DEVICE NICOTINE ; COASTAL CLOUDS PREMIUM VAPOR PASSION FRUIT ORANGE GUAVA; EONSMOKE DEVICE NICOTINE ; NICOTINE VAPE JUICE; CLOUD NURDZ PEACH BLUE RASPBERRY RAZZ 6MG 100ML VAPE JUICE; ALTRIA JUUL VIRGINIA TOBACCO FLAVORED 5 NICOTINE JUUL PODS; ZYN WINTERGREEEN 6MG POUCHES; NICORETTE FRUIT CHILL NICOTINE POLACRILEX; NICORETTE CINNAMON SURGE NICOTINE POLACRILEX; NICOTINE REPLACEMENT LOSANGE; JUUL MI POD DEVICE NICOTINE; ROVE DANK VAPES AND CHRONIC BRANDS OF THC INFUSED E LIQUIDS; NICOTINE SYS KIT; NICOTINE DIS; NIQUITIN NICOTINE ; NICOTINE PATCH 14 MG DAY; NICOTINE PATCHES; NICORETTE NICOTINE BETADEX ; NICOPATCHLIB 21 MG 24 HEURES DISPOSITIF TRANSDERMIQUE; NICOTINE STEP 2 14MG 24HR; NICOTINELL NICOTINE BITARTRATE ; NICOTINE PATCH REMOVAL; NICOTINE VAPING; NICORETTE INHALER; NICOTINE 3 STEP; NICORETTE MINI LOZENGE 4MG; NICORETTE PATCH NICOTINE ; NICORETTE PATCH; NICORETTE MICROTAB; ETOS NICOTINE MINT 4 MG ZUIGTABLET; CLEAR NICOTINE; NICOTINE 21MG 24HR TIER 1; NICOTINE 21MG 24HR TIER 3; NICOTINE NON DRL ; NICOTINE STEP 1 21MG 24HR; NICOTINE 21MG 24 PATCH; NICOTINEL TTS; SIGNATURE CARE NICOTINE; NICOTINE 21 MG 24 HR PT24; NICOTINE TRANSDERMAL SYSTEM PATCH; HABITROL NICOTINE REPLACEMENT; NICOTINE 21 MG 24 HR PT24 TIER 1; PROVAPOR NICOTINE PROPYLENE GLYCOL ; NICOTINE PLEISTER 7MG 24UUR NICOTINEL NICOPATCH NICOTINELL TTS 10; NICOTINE PUFF BARS; E LIQUID PODS NICOTINE 34MG ML; NICOTINELL MENTHE; NICOTINE POLACRILEX LOZENGES; NICOTINELL MENTHE 2 MG COMPRIME A SUCER; SILDENAFIL LISINOPRIL ATORVASTATIN FUROSEMIDE NICOTINE TD; GENERIC NICOTINE GUM; NICOTINELL 14MG 24STUNDEN; NICOTINE INHALATOR; NICOTINE INHALER CART; NICOTINE 14MG 24HR; NICOTINE PATCH 14 MG; NICORETTE SPRAY UNSPECIFIED; NICOTINE TRANSDERMAL PATCH 21MG; NICOTINE POL; RUGBY NICOTINE; NICOTINE TOBACCO LEAF; CVS NICOTINE MOUTH THROAT GUM; NICOTINE NICOTINEL NICOPATCH ; NICOTINE TRANSDERMAL SYST; NICOTROL INH; DEVICE NICOTINE; NICOTINE PROPYLENE GLYCOL; NICOLAN NICOTINE ; NICOTINE TRANSDERMAL SYS; NICOTINE GUM PATCH; NICOTINE PATCH 14 MCG 24 HR; NICOTINE TD DIS 21MG 24H; NICOTROL INHALAR; NICOTINE NICOTINE TRANSDERMAL SYSTEM; NICOTINE PATCH 14 MG TRANSDERMAL DAILY; NICOTINE LOZENGE 2MG BY MOUTH AS NEEDED; CVS NICOTINE GUM; NICOTINE 14MG; NICOTROL NICOTINE ; SM NICOTINE; HABITROL LOZENGE CHERRY; KIRKLAND SIGNATURE QUIT 4; NICOTINE EG; NICOTINE COTININE; SALT NICOTINE 1 8 ; SMOKES NICOTINE VAPE; NICOTINE 10 MG INHALER 1 PUFF AS NEEDED FOR SMOKING CESSATION; NICOTINE NICOTROL INH ; NICOTINE TD DIS24H; NICOTINE TRANSDERMAL PATCH 21 MG; NICOTINE 14MG PATCH; NICOTINE 14 MG; GOOD SENSE; MENTHOL NICOTINE; NIQUITIN CQ NICOTINE ; CONTROL STEP 1 21MG NCH NICOTINE TRANS THERAPEUTIC SYSTEM; TOCOPHERYL NICOTINE NICHI E ANTE ; NICORETTE GUM NICOTINE RESIN ; NICOPATCH NCH NICOTINE TRANS THERAPEUTIC SYSTEM; NICOTINR NICOTINE ; NICOTINE RESIN NICOTINE RESIN ; NICORETTE PFLASTER NICOTINE PATCH; NICORETE NICOTINE RESIN ; NICORETTE PATCH NICOTINE PATCH; NICOTINE SUBSTITUTE; NICOTINE NICOTINE NICOTINE ; WALMART EQUATE STEP 1 21MG NCH NICOTINE ; NICORETTE PFLASTER NICOTINE PATCH; NICODERM CQ FORMULATION UNKNOWN 14 MG NICOTINE ; NICOTINELL TTS NCH NICOTINE TRANS THERAPEUTIC SYSTEM; NICOTROL PATCH NICOTINE ; NICOTINE TRANSDERMAL PATCH 14 MG; NICOTROL NICOTINE TRANSDERMAL PATCH 15MG; NICOTINELL TTS NICOTINE ; NICODERM Q PATCH NICOTINE ; NICORETTE OTC NICOTINE POLACRILEX ; ORALVITE VITAMIN B1 VITAMIN B2 VITAMIN B6 VITAMIN C NICOTINE AMIDE ; NICOTINE UNSPECIFIED NICOTINE ; NICOTINE DERMAL PATCH NICOTINE RESIN ; NICOTINE PATCH EQUATE ; NICOTINELL GUM NICOTINE ; CONTROL STEP 1 21 MG NCH NICOTINE TRANS THERAPEUTIC SYSTEM; PRIVATE LABEL STEP 1 21MG ACCT UNKNOWN NCH NICOTINE TRANS THERAPEUT; COMMIT NICOTINE POLACRILEX LOZENGE 2MG; NIQUITIN NICOTINE POLACRILEX ; EQUATE NICOTINE GUM 4MG; EQUATE NICOTINE GUM 2MG; NICOTINE ACID; NICOTINELL NICOTINE NCH NICOTINE TRANS THERAPEUTIC SYSTEM; NICOTINE POLACRILEX MINT WATSON LABORATORIES NICOTINE POLACRILEX GU; REXALL TRANSDERMAL NICOTINE PATCH NCH NICOTINE TRANS THERAPEUTIC SY; NICOTINELL KAUGUMMI NCH NICOTINE CHEWABLE GUM; NICOTINE DERMA PATCH NICOTINE RESIN ; PRIVATE BRAND NICOTINE PATCHES WALMART; NICOTINELL NICOTINE ; NICOTINE NICODERM ; CONTROL STEP 1 21MG NCH NICOTINE TRANS THERAPEUTIC SYSTEM; NICOTINE PATCHE; KROGER STEP 2 14MG NCH NICOTINE TRANS THERAPEUTIC SYSTEM; NICOTINE NICOTINE PATCH; NICOTINE GUM NICOTINE ; NICOTINE POLACRILEX NICOTINE POLACRILEX ; PRIVATE LABEL STEP 1 21 MG ACCT UNKNOWN NCH NICOTINE TRANS THERAPE; PRIVATE LABEL STEP 1 21MG ACCT UNKNOWN NCH NICOTINE TRANS THERAPEU; CONTROL STEL 1 21MG NCH NICOTINE TRANS THERAPEUTIC SYSTEM; PRIVATE LABEL STEP 1 21MG NCH NICOTINE TRANS THERAPEUTIC SYSTEM; PRIVATE LABEL STEP 3 7MG ACCT NCH NCH NICOTINE TRANS THERAPEUTIC S; OSCO STEP 2 14MG NCH NICOTINE TRANS THERAPEUTIC SYSTEM; OSCO STEP 1 21MG NCH NICOTINE TRANS THERAPEUTIC SYSTEM; NICOTINELL TTS NCH NICOTINE TRANS THERAPEUTIC SYSTEM; NICOTINE PATCH LONG ACTING ; HABITROL NICOTINE TRANS THERAPEUTIC SYSTEM; NICOTINE CHEWABLE GUM; PRIVATE LABEL STEP 2 14MG ACCT UNKNOWN NCH NICOTINE TRANS THERAPEUT; PRIVATE LABEL STEP 3 7MG ACCT UNKNOWN NCH NICOTINE TRANS THERAPEUTI; WALGREEN S STEP 1 21 MG NICOTINE ; PROSTEP NICOTINE TRANSDERMAL SYSTEM; NICOTINE PATCH TOPICALS; NICOTINE NICODINE ; NICORETTE INHALER INICOTINE ; PRIVATE LABEL STEP 1 21MG ACCT UNKNOWN NCH NICOTINE ; BROOKS MAXI DRUG NCH NICOTINE TRANS THERAPEUTIC SYSTEM; WALGREEN S NCH NICOTINE TRANS THERAPEUTIC SYSTEM; NICOTINE PATCH TRANSDERMAL; PRIVATE LABEL STEP 1 21MG ACCT NCH NICOTINE TRANS THERAPEUTIC SYSTEM; EQUATE NICOTINE PATCH; NICOTINE POLACRILEX MINT ; NICOTINE PATCH 7MG; NICOTINE POLACRILEX NICOTINE POLACRILEX LOZENGE TROCHE AND CANDY TO; NICOTINE POLACRILEX GUM MINT 2 MG PERRIGO; NICOPATCH NICOTINE ; MEMBERS MARK NICOTINE GUM 2MG ORIGINAL; MEMBERS MARK NICOTINE GUM 4MG ORIGINAL; EQUATE NICOTINE GUM 2MG MINT; EQUATE NICOTINE GUM; AMERICAN FARE NICOTINE GUM 2MG ORIGINAL; NICOTINE 14 MG 24 HR; COMMIT NICOTINE POLACRILEX MINT LOZENGE; WALMART EQUATE STEP 1 21 MG NCH NICOTINE ; PRIVATE LABEL STEP 1 21 MG NCH NICOTINE TRANS THERAPEUTIC SYSTEM; WALMART EQUATE NCH NICOTINE TRANS THERAPEUTIC SYSTEM; NICOTROL NOCOTINE ; NICOPATCH TRANSDERMAL PATCH NICOTINE ; NICOPATCH NICOTINE ; ALPHAPHARM QUITX NICOTINE ; NICOTINE GUM NICOTINE POLACRILEX ; LONDON DRUGS TRANSDERMAL NICOTINE PATCH NCH NICOTINE TRANS THERAPE; WALGREE S NCH NICOTINE TRANS THERAPEUTIC SYSTEM; WALMART EQUATE NCH NICOTINE TRANS THERAPEUTIC SYSTEM; NICOTINE NICOTINE LOZENGE; ALPHARPHARM QUITX NCH NICOTINE TRANS THERAPEUTIC SYSTEM; NICOTINELL TS 30 NCH NICOTINE TRANS THERAPEUTIC SYSTEM; NICOTINE GUM 4MG PERRIGO COMPANY; NICABATE NICOTINE ; PRIVATE LABEL NCH NICOTINE TRANS THERAPEUTIC SYSTEM; KROGER PLP NCH NICOTINE TRANS THERAPEUTIC SYSTEM; NICOTINELL KAUGUMMI CHEWABLE GUM; PRIVATE LABEL NICOTINE TRANS THERAPEUTIC SYSTEM; NICOTINE TTS; NICOTINELL LOZENGE NCH NICOTINE LOZENGE; EQUATE NICOTINE GUM 4 MG MINT; AMERICAN FARE NICOTINE GUM 4MG ORIGINAL; TARGET NICOTINE GUM 4MG MINT; ECKERD PLP NCH NICOTINE TRANS THERAPEUTIC SYSTEM; CVS NCH NICOTINE TRANS THERAPEUTIC SYSTEM; WALLGREEN S NCH NICOTINE ; KROGER PLP NCH NICOTINE TRANS THERAPEUTIC SYSTEM; NICOTINE 14MG 24HR PATCH; NICOTINELL 21; NICOTINELL GUM NCH NICOTINE CHEWABLE GUM; NICOTINELL GUM NCH NICOTINE CHEWABLE GUM; NICOTELL TTS NCH NICOTINE TRANS THERAPEUTIC SYSTEM; NICOTINELL KAUGUMMI NCH NICOTINE CHEWABLE GUM; ALPHAPHARM QUITX NCH NICOTINE TRANS THERAPEUTIC SYSTEM; NICOTINE 7MG 24HT TRANSDERMAL PATCH; ALPHAPHARM QUITX NCH NICOTINE TRANS THERAPEUTIC SYSTEM; NICASSIST PATCH NICOTINE ; BOOTS NICASSIST 10 MG INHALATOR NICOTINE ; BOOTS NICASSIST 2 MG MINT GUM NICOTINE ; BOOTS NICASSIST 4 MG MINT GUM NICOTINE ; EQUATE 21MG NICOTINE TRANSDERMAL PATCH; NICORETTE GUM NICOTINE POLACRILEX ; NICOTINELL TTS NCH NICOTINE ; NICOTINELL 01033301 ; PRIVATE LABEL STRENGTH UNKNOWN NCH NICOTINE TRANS THERAPEUTIC SYSTE; WALGREEN S STEP 1 21MG NICOTINE NICOTINE PATCH; TARGET NICOTINE GUM 2MG MINT; EXACT TRANSDERMAL NICOTINE PATCH NCH NICOTINE TRANS THERAPEUTIC SYS; CHANTIX NICOTINE ANTAGONIST ; AMCAL NCH NICOTINE TRANS THERAPEUTIC SYSTEM; COMMIT NICOTINE POLACRILEX LOZENGE LOZENGE NOCOTINE POLACRILEX ; ALPHAPHARM QUITX NCH NICOTINE TRANS THERAPEUTIC SYSTEM; NIQUITIN NICOTINE NICOTINE ; NICOTINE NICOTINE POULTICE OR PATCH ; PRIVATE LABEL NCH NICOTINE TABLET THERAPEUTIC SYSTEM; TARGET PLP NCH NICOTINE TRANS THERAPEUTIC SYSTEM; NICOTELL KAUGUMMI NCH NICOTINE CHEWABLE GUM; MEMBERS MARK NICOTINE GUM ORIGINAL; NICOTINE POLACRIFLEX GUM 2 MG PERRIGO COMPANY; NICOTINE RESIN PREV ; NICOTINELL TTS NCH NICOTINE ; NICOTINE PATCH GENERIC NICOTINE ; HABITROL NICOTINE TRANS THERAPEUTIC SYSTEM; NICTOROL NICOTINE ; NICOTINE TRANSDERMAL SYSTEM 21 MG; NICOTINE PATCH NICOTINE PATCH ; NICORETTE PATH NICOTINE ; NICOTINE GUM NCH NICOTINE ; NICODERM CQ NICOTINE FORMULATION UNKNOWN ; NICOTINELL CHEWING GUM FRUIT NCH NICOTINE CHEWABLE GUM; WALLMART EQUATE NCH NICOTINE TRANS THERAPEUTIC SYSTEM; CONTROL PLP NICOTINE PATCH ; NICOTINE POLAXRILEX NICOTINE POLACRILEX ; NICOTINELL CLASSIC NICOTINE ; NICORETTE NICOTINE CHEWABLE TABLET; WALMART EQUATE NCH NICOTINE TRANSDERMAL TRANS THERAPEUTIC SYSTEM; NICOTINELL TTS NCH NICOTIINE TRANS THERAPEUTIC SYSTEM; NICORET NICOTINE RESIN PATCH; NICOTINE PRIVATE LABEL NICOTINE TRANS THERAPEUTIC SYSTEM; NICORETTE NICOTINE PIPERAZINE ; NICOTINELL TTS NCH NICOTINE TRANS THERAPEUTIC SYSTEM; NICOTINE 14 MG DAY ; NICOTINELL TTS NICOTINE TRANS THERAPEUTIC SYSTEM; WALGREEN S NICOTINE TRANS THERAPEUTIC SYSTEM; NICOTINELL TT NCH NICOTINE TRANS THERAPEUTIC SYSTEM; EQUATE NICOTINE POLARCILEX GUM 2MG EQUATE WAL MART; NICOTINE POLACRILEX GUM 2 MG PERRIGO COMPANY; QUITX GUM NCH NICOTINE CHEWABLE GUM; NICOTINE POLACRILEX WATSON LABORATORIES ; NICOTINELL GUM 2 MG FRUIT NCH NICOTINE CHEWABLE GUM; NICOTINE CON ; NICOTINELL TTS NCH NICOTINE TRANS THERAPEUTIC SYSTEM; NICOTINE NICOTINE UNKNOWN 10 MG; NOVICOL 01053601 NULTYTELY NICOTINELL 01033301 NICOTINE CON ; NICOTINELL 01033301 NICOTINE CON ; NICOTINELL LOZENGE; COMMIT NICOTINE POLACRILEX CAPPUCCINO LOZENGE 4MG; COMMIT NICOTINE POLACRILEX CAPPUCCINO LOZENGE 2MG; COMMIT NICOTINE POLACRILEX CAPPUCCINO LOZENGE; NICOTINELL KAUGUMMI NICOTINE CHEWABLE GUM; ALPHAPHARM QUITX NCH NICOTINE CHEWABLE GUM; NICOTINE TRANSDERMAL 21MG NCH 0810; NICOTINE POULTICE OR PATCH ; PRIVATE LABEL NCH NICOTINE TRAN THERAPEUTIC SYSTEM; NICOTINELL US NCH NICOTINE TRANS THERAPEUTIC SYSTEM; NICOTINE TRANSDERMAL SYSTEM 7 MG; HABITROL NICOTINE TRANS THERAPEUTIC SYSTEM; EQUATE NICOTINE PATCH 21 MG WALMART; THRIVE 4 MG NICOTINE CHEWABLE GUM; NICOTINE UNSPECIFIED ; NICOTINE RESIN COMPLEX TABS; NICOTINELL TTS NICOTINE TRANS THERAPEUTIC SYSTEM; NICOTINELL 01033301 NICOTINE ; PRIVATE LABEL STRENGTH UNKNOWN NICOTINE ; NICOTINE PATCH NOVARTIS 21 MG; WALGREEN S NICOTINE TRANS THERAPEUTIC SYSTEM; NICOTINE 21 MG 24 HR PATCH; NICOTINELL TTS NICOTINE TRANS THERAPEUTIC SYSTEM; NICOTINELL GUM NICOTINE CHEWABLE GUM; CONTROL PLP NCH NICOTINE TRANS THERAPEUTIC SYSTEM; NICOTINE 23KG 24 PATCH; NICORETTE HOECHST MARION ROUSSEL NICOTINE ; SMOKING EVERYWHERE E CIGARETTE HIGH NICOTINE 16MG PER CARTRIDGE SMOK; NICOTINE POLACRILEX 2MG MINT COATED 456; GREEN SMOKE ELECTRONIC LOWEST NICOTINE CARTRIDGE GREEN SMOKE INC ; NICOTINE INHALATION SYSTEM; NICOTINELL GUM NCH ; NICOTINELL TTS NCH ; NICOTINE POULTICE AR PATCH ; NICOTINELL MINT 1MG NCH ; NICOTINELL TT; PRENATAL VITAMINS TOCOPHEROL NICOTINE ACID VITAMIND NOS MINERALS N; NICOTINELL MINT NICOTINE LOZENGE NCH ; NICOTINE TRANSDERMAL SYSTEM 7 MG 21 MG 14 MG ; NICOTINE NICOTINE POLACRILEX PATCH; NICOTINE NCH ; NICOTINE TRANSDERMAL PATCHES GENERIC MANUFACTURER UNKNOWN 21 MG; NICOTINE GUM NCH ; NICOTINE PATCH 21 MG CLEAR; NICOTINELL LOZENGE NCH ; NICOTINE POLYACRILEX; NICOTINE TRANSDERMAL SYSTEM 7 MG 7 MG ; GAURDIAN NICOTINE PATCHES; NICOTINE PATCH POULTICE OR PATCH ; NICOTINE POLACRILEX 4MG MINT 422; NICOTINE NICOTINE 7 MG; NICOTINELL COATED GUM 2 MG MINT NCH ; NICOTINELL GUM 2 MG FRUIT NCH ; NICOTINE POLACRILEX MINT COATED WATSON LABORATORIES ; NICOTINE POLACRILEX REGULAR 2 MG 029; RITE AID TRANSDERMAL NICOTINE SYSTEM STEP ONE; NICOTINE BITARTRATE NCH ; S NICOTINE ; NICOTINE INHALATION 10MG; NICOTROL INHALER NICOTINE IMPREGNATED PAD; NICOTINE NICOTINE TRANSDERMAL PATCH; NICOTINELL TTS 30 NCH ; MULTIVITAMIN ASCORBIC ACID ERGOCALCIFEROL FOLIC ACID NICOTINE PAN; WALGREENS NICOTINE TRANSDERMAL SYSTEM PATCH CLEAR 21MG; WALGREENS NICOTINE TRANSDERMAL SYSTEM PATCH CLEAR 14MG; NICOTINELL COATED GUM FRUIT NCH ; NICOTINE PATCH NICOTINE POULTICE ; DEKANG BOGE NICOTINE ELIQUID 18MG ML DEKANG BOGE; NICOTINELL CHEWING GUM FRUIT NCH ; NICOTINELL COATED GUM LIQUIRICE NCH ; NICOTINE PATCH NICOTINE POLACRILEX ; NICOTINELL TTS 20 NCH ; WALGREENS NICOTINE LOZENGE MINT 4MG; NICOTINE ORAL; GUARIDAN NICOTINE PATCHES; NICOTINELL GUM 2 MG FRUIT; ELECTRONIC CINGARETTE 14MG NICOTINE; EQUATE NICOTINE TRANSDERMAL SYST 21 MG WAL MART STORES INC ; NICORETTE INVISIPATCH 15MG; WALGREENS NICOTINE LOZENGE MINT 2 MG; NIQUITIN NICOTINE NICOTINE POLACRILEX NICOTINE RESINATE ; NICORETTE INVISIPATCH 25MG; NICOTINE POLACRILEX GUM 2 MG; NICOTINELL TTS 20; NICORETTE INVISIPATCH; NOCOTINEL NICOTINE ; NICOTINE POLLACRILEX COMPRESSED LOZENGE; NICOTINELL CHEWING GUM FRUIT; NICOTINELL TTS30 NICOTINE ; NICOTINE GUM AND LOZENGES; NICOTINE CHEWING GUM NICOTINE NICOTINE ; NICOTINE NICORETTE INVISIPATCH; NICOTINE PATCH NICOTINE NICOTINE ; NICOTINE POLACRILEX GUM 2 MG ORIGINAL; NICORETTE NICOTINE POLACRILEX LOZENGE 2MG; QUIT NICOTINE; NICOTINE POLACRILEX GUM 4 MG ORIGINAL; NICOTINE BITARTRATE ANHYDROUS; NICOTINE POLACRILEX GUM ORIGINAL 4 MG; ONE A DAY MEN S ASCORBIC ACID CHROMIUM COOPER CYANOCOBALAMIN FOLIC ACID IODINE MAGNESIUM MANGANESE MOLYBDENUM NICOTINE ACID PANTOTHENIC ACID POTASSIUM PYRIDOXINE HYDROCHLORIDE RETINOL RIBOFLAVIN SELENIUM THIAMINE TOCOPHEROL VITAMIN D NOS ZINC ; NICOTINE PATCH UNKNOWN BRAND; EXACT TRANSDERMAL NICOTINE PATCH; NICOTINE POLACRILEX GUM 2 MG MINT; VARENICLINE BUPROPION NICOTINE PLACEBO; EQUALINE NICOTINE LOZENGES; NICOTINE PATCH 14MG ALERE WELLBEING; NICORETTE NICOTINE POLACRILEX LOZENGE; COMMIT NICOTINE POLACRILEX LOZENGE; NICORETTE NICOTINE POLACRILEX MINT LOZENGE 4MG; NICOTINE PATCHES PATCH DONE BASED ON CIGARETTE; GUARDIAN NICOTINE PATCHES NICOTINE PATCH NOT SPECIFIED ; KROGER ORIGINAL NICOTINE GUM 2MG; KROGER FRUIT WAVE NICOTINE GUM 2MG; KROGER FRUIT WAVE NICOTINE GUM 4MG; KROGER ORIGINAL NICOTINE GUM 4MG; KROGER MINT NICOTINE LOZENGE 4MG; KROGER ORIGINAL NICOTINE GUM; NICOTINE POLACRILEX LOZENGE 2 MG NICOTINE; NICOTINE NICOTINE ; MULTIVITAMIN VIGRAN EGRGOCALCIFEROL ASCORBIC ACID PYRIDOXINE HYDROCHLORIDE THIAMINE HYDROCHLORID RETINOL RIBOFLAVINE NICOTINEAMIDE CALCIUM PANTOTHENATE; NICORETTE QUICKMIST NICO SPRAY; NICORETTE QUICKMIST 1MG NICO SPRAY; NICOTINE PATCH NICOTINE PATCH NICOTINE PATCH ; NICOTINE POLACRILEX 2 MG ORIGINAL; NICOTINE POLACRILEX 2 MG; NICOTROL NICOTINE UNKNOWN ; NICOTINE PATICH; NICOTINE POLACRILEX LOZENGE 4 MG NICOTINE; NICORETTE INVISIPATCH 25MG 16H; NICOTINELL CLASSIC; NICOTINE FRESHMINT GUM 4 MG; NICOTINE POLACRILEX LOZENGE; NICOTINE POLACRILEX 4MG MINT; NICOTINE CQ; NICOTINE POLACRILEX GUM 4 MG; NICOTINELL NICOTINE; NICOTINE POLACRILEX 4MG GUM; NICOTINE POLACRILEX 4 MG; NICOTROL INHALER 10MG CARTRIDGE 4MG DELIVERED PFIZER; TRANSDERMAL NICOTINE REPLACEMENT THERAPY PATCH NICOTINE TRANSDERMAL PATCH ; NICOTINE NOT SPECIFIED ; NICOTINELL MINT LOZENGE; NICODERM NICOTINE UNKNOWN ; NICOTINELL; NICOTINE PATCH NICOTINIE ; NICOTINE MOUTH SPRAY 1 MG; NICOTINE GUM ; NICOTINE PATCH NICODERM ; NICOTINE REMOVE PATCH PATCH REMOVE TOPICAL MEDICATION ; NICORETTE QUICKMIST 1MG; NICOTROL TABLET 10MG CARTRIDGE 4MG DELIVERED PFIZER; NICOTINELL PATCH TTS NICOTINE TRANSDERMAL PATCH ; NICOTINELL MINT NICOTINE GUM; NICORETTE NICOTINE POLACRILEX MINT LOZENGE; NICORETTE NICOTINE POLACRILEX MINT LOZENGE 2MG; NICORETTE NICOTINE POLACRILEX CHERRY LOZENGE 2MG; WALGREENS NICOTINE TRANSDERMAL SYSTEM PATCH CLEAR 7MG PATCH; NICOTINE GUM 2 AND 4 MG WAL MART COSTCO NICORETTE; NICOTROL CARTRIDGE INHALER; 1 2 NICOTINE SPRAY; COMMIT NICOTINE POLACRILEX LOZENGE 4MG; KROGER NICOTINE LOZENGE 2MG; KROGER COATED MINT NICOTINE GUM 2MG; KROGER MINT NICOTINE GUM 2MG; KROGER MINT NICOTINE GUM 4MG.

**drug name: bupropion**

WELLBUTRIN; BUPROPION; WELLBUTRIN SR; BUPROPION HCL; BUPROPION HYDROCHLORIDE; WELLBUTRIN XL; BUPROPION XL; APLENZIN; FORFIVO XL; BUPROPION SR; BUPROPION XR; BUPROPION HCL TABLETS; BUDEPRION; BUPROPION HCL ER; BUPROPION XL 300MG TABLET; BUPROPION HCL ER XL ; BUPROPION HYDROCHLORIDE EXTENDED RELEASE TABLETS USP SR 100MG; ZYBAN; WELLBUTRIN SR BUPROPION HYDROCHLORIDE TABLET CONTROLLED RELEASE BUPROPION HYDROCHLORIDE ; WELLBUTRIN BUPROPION HYDROCHLORIDE ; BUPROPION HCI; BUPROBAN; BUPROPION BUPROPION 150 MILLIGRAM TABLET BUPROPION ; BUPROPION EXTEDED RELEASE ; WELLBUTRIN XL 150MG BIOVAIL; ELONTRIL; BUPROPION BUPROPION ; BUPROPION ; BUPROPION HCL BUPROPION HYDROCHLORIDE UNKNOWN ; BUPROPION HCL BUPROPION HYDROCHLORIDE ; BUPROPION BUPROPION ; WELLBUTRIN BUPROPION HYDROCHLORIDE UNKNOWN ; WELLBUTRIN XR; BUPROPION HYDROCHLORIDE EXTENDED RELEASE TABLETS USP SR ; BUPROPION HYDROCHLORIDE ; BUPROPION ER; BUPROPION XL 24 HR SR; BUPROPION ZL; BUPROPION HYDROCHLORIDE EXTENDED RELEASE TABLETS USP XL ; WELLBUTRIN XL BUPROPION HYDROCHLORIDE PROLONGED RELEASE TABLET BUPROPION HYDROCHLORIDE ; WELLBUTRIN BUPROPION HYDROCHLORIDE BUPROPION HYDROCHLORIDE ; BUPROPION BUPROPION BUPROPION ; BUPROPION HCI TABLETS EXTENDED RELEASE; BUPROPION HCL XL; WELLBUTRIN BUPROPION HYDROCHLORIDE BUPROPION HYDRCHLORIDE ; BUPROPION HYDROCHLORIDE UNKNOWN ; ELONTRIL BUPROPION HYDROCHLORIDE PROLONGED RELEASE TABLET BUPROPION HYDROCHLORIDE ; WELLBUTRIN BUPOPION HYDROCHLORIDE ; BUPROPION HYDROCHLORIDE; BUDEPRION XL; BUPROPION HCL EXTENDED RELEASE ; BUPROPRION; WELLBUTRIN BUPROPION HYDROCHLORIDE TABLET BUPROPION HYDROCHLORIDE ; BUPROPION EXTENDED RELEASE UNKNOWN ; BUPROPION UNKNOWN ; BUPROPION SR 150 MG SANDOZ; BUPROPION TABLET BUPROPION ; BUPROPION XL 300 MG MYLAN; BUPROPION BUPROPION HYDROCHLORIDE ; WELLBUTRIN BUPROPION HYROCHLORIDE ; BUPROPION 150 MG; BUPROPION NON SPECIFIC ; BUPROPION BUPROPION HYDROCHLORIDE; BUPROPION HYDROCHLORIDE WATSON LABORATORIES ; BUPROPION XL BUPROPION UNKNOWN; BUPROPION TABLET; BUPROPRION BUPROPION ; BUPROPIONE BUPROPION ; BUPROPION HC SR; BUPROPIONE; BUPROPION 00700502 ; BUPROPION WELLBUTRIN XL ; WELLBUTRIN XL BUPROPION HYDROCHLORIDE ; BUDEPRION XL WELLBUTRIN; BUPROPION HC1 ER XL 300 MG; BUPROPION XL 150 MG; BUPROPION HCL SR; WELLBUTRIN NOT SPECIFIED ; BUPROPION HYDROCHLORIDE UNSPECIFIED TABLET GENERIC BUPROPION HYDROCHLORIDE ; BUPROPION HYDROCHLORIDE TABLETS; WELLBUTRIN XR BUPROPION HYDROCHLORIDE TABLET EXTENDED RELEASE BUPROPION HYDROCHLORIDE ; BUPROPION HYDROCHLORIDE EXTENDED RELEASE SR; BUPROPION HYDROCHLORIDE EXTENDED RELEASE TABLETS USP SR 150MG; WELLBUTRIN 75 MG; APLENZIN BUPROPION HYDROBROMIDE BUPROPION HYDROBROMIDE ; BUPROPION EXTENDED RELEASE; BUPROPION HCL BUPROPION HYDROCHLORIDE TABLETS ; BUPROPION XL 300MG PAR; BUPROPION BUPROPION 75 MILLIGRAM TABLETS ; WELLBUTRIN BUPROPION BUPROPION ; BUPROPION SR 159MG; BUPROPION HCL ER XL 24HR; BUPROPION SA; BUPROPION WELLBUTRIN ; WELLBUTRIN BUPROPION HYDROCHLORIDE SUSTAINED RELEASE TABLET ; BUPROPION HCL XL BUPROPION HYDROCHLORIDE UKNOWN ; WELLBUTRIN BUPROPION HYDROCHLORIDE TABLET BUPROPION HYDROCHLORIDE ; WELLBUTRIN SR 100 MG; WELLBUTRIN SR BUPROPION UNKNOWN ; BUPROPION HCL 150 MG; AMFEBUTAMONE; BUPROPION HCL XR; CONTRAVENT; BUPROPION HCL XL TABLETS; WELLBUTRIN GENERIC 150 MG; BUPROPION HYDROCHLORIDE SR; BUPROPION HCL BUPROPIONI HYDROCHLORIDE ; BUPROPION 300MG ACTAVIS; BUPROPION 150MG ACTAVIS PH; BUPROPION HCL XL 150 MG GLOBAL IMPAX; BUPROPION HYDROCHLORIDE TABLET BUPROPION HYDROCHLORIDE ; BUPROPION HYDROCHLORIDE PROLONGED RELEASE TABLET BUPROPION HYDROCHLORIDE ; WELLBURTIN BUPROPION HYDROCHLORIDE ; BUPROPION HYDROCHLORIDE BUPROPION HYDROCHLORIDE BUPROPION HYDROCHLRORIDE ; BUPROPION HYDROCHLORIDE EXTENDED RELEASE SR WATSON LABORATORIES ; BUPROPION HCL ER SR ; GENERIC WELLBUTRIN; WELLBUTRIN 00700502 ; WELLBUTRIN XR RETARD; BUPROPION SR 150 MG UKNOWN; BUPROPION HYDROCHLORIDE XL; GENERIC WELLBUTRIN XL; BUPROPRION XL; BUPROPION HCL XL BUPROPION HYDROCHLORIDE TABLETS ; BUPROPION HCL XL 300 MG ACTIVIS; BUPROPION BUPROPION UNKNOWN BUPROPION ; WELLBUTRIN XL BUPROPION HYDROCHLORIDE UNKNOWN ; BUPROPION HYDROBROMIDE; WELLBUTRIN XL GENERIC; WELLBUTRIN HCL BUPROPION HYDROCHLORIDE ; WELLBUTRIN SR BUPROPION HYDROCHLORIDE ; WELLBUTRIN SR BUPROPION ; WELLBATRIN; WELLBUTRIN BUPROPION ; BUPROPION HYDROCHLORIDE EXTENDED RELEASE XL ; WELLBUTRIN BUPROPION ; BUPROPRION SR; WELLBUTRIN BUPNOPIOW HYDROCHLORIDE ; APLENZIN BUPROPION HYDROBROMIDE ; WELLBUTRIN XL BUPROPION HCL ; WELLBUTRIN BUPROPIN HCL XL; WELLBUTRIN SR NAME BRAND ; BUPROPION HCL ER XL; BUPROPION ER XL TB24; WELLBUTRIN GENERIC; BUPROPRION HCL; BUPROPION XL 300MG; BUPROPION SR 150 MG SUN PHARMA; BUPROPION SR 150MG; VOXRA; BUPROPION HYDROBROMIDE BUPROPION HYDROBROMIDE ; BUPROPION BUPROPION HYDROCHLORIDE ; BUPROPRION XL 300MG; WELLBUTRIN BUPROPION HYDROCHORIDE ; BUPROPIONE CLORIDRATO; BUPROPION HYDROCHLORIDE BUPROPION HYDROCHLORIDE ; WELLBUTRIN BUPROPION HYDRICHLORIDE BUPROPION HYDROCHLORIDE ; BUPROPION HYDROCHLORIDE WATSON LABORATORIES BUPROPION HYDROCHLORIDE ; WELLBUTRIN BUPROPION HYDROCHLORIDE ; BUPROPION FR; BUPROPION EXTENDED RELEASE ; BUPROPION HCL 100 MG WATSON; BUPROPION ACTAVIS; BUPROPION HYDROCHLORIDE ACTAVIS LABORATORIES FL ; BUPROPION HYDROCHLORIDE SR ; BLINDED NALTREXONE BUPROPION; BUPROPION HYDROCHLORIDE PROLONGED RELEASE TABLET; MYLAN BUPROPION XL; WELLBUTRIN BUPROPION HYDROCHLRIDE ; BUPROPION SR 150 MG ACTAVIS; BUPROPION SR TAB; CONTRAVE; BUPROPION SR PROLONGED RELEASE TABLET; BUPROPION HCL TABLET; BUPROPION SANDOZ; BUPROPION PROLONGED RELEASE TABLET; BUPROPION HYDROCHLORIDE TABLET; BUPROPION HCL MODIFIED RELEASE TABLET; WELLBUTRIN SR TABLET; BUPROPION MODIFIED RELEASE TABLET; WELLBUTRIN SR MODIFIED RELEASE TABLET; WELLBUTRIN XL PROLONGED RELEASE TABLET; WELLBUTRIN BUPROPION HYDROCHLORIDE; NALTREXONE BUPROPION VS PLACEBO; WELLBUTRIN SR BUPROPION HYDROCHLORIDE SUSTAINED RELEASE ; BUPROPION XL 300 MG ACTAVIS; BUPROPION BUPROPION HYDROHLORIDE ; WELLBUTRIN IBUPROPION HYDROCHLORIDE ; WELLBUTRIN GEN ; WELLBUTRIN BUPROPION UNSPECIFIED; BUPROPION HYDROCHLORIDE MODIFIED RELEASE TABLET; MYLAN BUPROPION CHLORHYDRATE DE BUPROPIONE ; BUPROPION 100 MG MYLAN; BUPROPION HYDRCHLORIDE; BUPROPION GENERIC WELLBUTRIN 150 MG; BUPROPION EXTENDED RELEASE ; BUPROPION 150MG XL TEVA; BUPROPION SR 300 MG WATSON; BUPROPION EXTENDED RELEASE ; WELLBUTRIN LR; BUPROPION LONG ACTING ; BUPROPION HYDROCHLORIDE APOTEX; BUPROPIONE SR; WELLBUTRIN HCL; ELONTRIL 150 MG EXTENDED RELEASE TABLETS 30TABLETS; AMLODIPINE WELLBUTRIN; BUPROPION 100 SR; BUPROPION SR BUPROPION ; WELLBUTRIN BUPROPRION HYDROCHLORIDE ; BUPROPION HCI XL; BUPROPION HYDROCHLORIDE XL ; GENERIC WELLBUTRIN BUPROPRION; BUPROPION SR 100 MG; BUPROPION HCL 150 MG XL; WELLBUTRINXL; BUPROPION HCI ER SR ; BUPROPION HAL SR; GENERIC WELLBUTRIN 150MG VARIOUS; WELLBUTRIN SR BRAND NAME ; GENERIC WELLBUTRIN BUPROPION HYDROCHLORIDE ; NALTREXONE BUPROPION; BUPROPION BUPROPION UNKNOWN; BUPRON; WELLBUTRIN XL BUPROPION XL ; BUPROPION HCL ER SMOKING DET ; BUPROPION XL 300 MG; BUPROPION HCL ER BUPROPION HYDROCHLORIDE ; BUPROPION HCL SLOW RELEASE ; BUPROPION HCL 75 MG; BUPROPION HCL SR ; BUPROPION 75 MG; BUPROPION HEL XL; CONTRAVE ER; BUPROPION HC1; WELLBUTRIN BUPROPION HYDROCHLORIDE ; VOXRA 300 MG TABLETT MED MODIFIERAD FRIS TTNING; BUPROPION HCL ER SR; BUPROPION XL 150MG MYLAN; BUPROPION HCL SUSTAINED RELEASE WELLBUTRIN SR ; BUDEPRION SR; WELLBUTRIN XL BUPROPION HYDROCHLORIDE BUPROPION HYDROCHLORIDE ; WELLBUTRIN IBUPROPION ; BUPROPN HCL; BUPROPION HYDROCHLORIDE TABLETS USP; BUPROPION HYDROCHLORIDE WATSON LABORATORIES BUPROPION HYDROCHLORIDE PROLONGED RELEASE; BUPROPION HYDROCHLORIDE EXTENDED RELEASE SR WATSON LABORATORIES BUPROPION HYDROCHLORIDE TABLET EXTENDED RELEASE 150MG; WELLBUTRIN XL BUPROPION ; BUPROPION BUPROPION TABLET; BUPROPRION 24 XL TAB 150 MG; IBUPROPION; WELLBUTRIN 00700502 ; BUPROPION WELLBUTRIN; TOLTERODINE HCL BUPROPION HYDROCHLORIDE ; BUPROPION HCL XL 24 HR; BUPROPION HYDROCHLORIDE DISPERSIBLE TABLET; BUPROPRION HCL SR 100 MG; BUPROPION HYDROCHLORIDE EXTENDED RELEASE TABLETS USP SR ; BUPROPION 300XL; BUPROPION 150XL; WELLBUTRIN XL 300 MG GENERIC; BUPOPRION XL 300 MG MBR ; BUPROPION XR; BUP; BUPROPION HCL ER XL 150 MG PAR; WELLBUTRIN 300 XR; BUPROPION ST 150 MG MYLAN; BUPROPION HCL SR ; DISCONTINUED CONTRAVENTION; BUPROPION SR 100 MG; IC BUPROPION IICL XL; BUPROP; BUPROPION HYDROCHLORIDE EXTENDED RELEASE; BUPROPION SR 150 MG SUN PHARMACEUTICAL; BUPROPION HCL XI; BUPROPION HYDROCHLORIDE ER; CONTRAVE BUPROPION NALTREXONE ; AMFEBUTAMONE HYDROCHLORIDE; BUPROPION XL WELLBUTRIN XL 300 MG; SANDOZ BUPROPION SR; BUPROPION 300 MG; BUPROPRION WELLBUTRIN; BUPROPION XL 24HR WELLBUTRIN XL ; WELLBUTRIN ER; BUPROPION HYDROCHLORIDE ACTAVIS; BUPROPRION 300 MG; WELLBUTRIN BUPROPION HCL ; WELLBUTRIN SE IBUPROPION HCL ; BUPROPION SR 150MG SUN PHARMA; BUPROPION SR 150MG SANDOZ; BUPROPION XI; ZYNTABAC; WELLBUTRIN SR BUPROPION HCL ; WELLBUTRIN SR 150 MG TB12 BUPROPION HCL ; IBUPROPION SR; MYLAN BUPROPION XL; BUPROIPION; RATIO BUPROPION SR; BUPROPION HCL PROLONGED RELEASE TABLET; VOXRA BUPROPION HYDROCHLORIDE ; BUPROPION HCL BUPROPION HYDROCHLORIDE PROLONGED RELEASE TABLET; WELLBUTRIN X R; BUPROPION BUPROPION HYDROCHLORIDE; WELLBUTRIN 300XL; BUPROPION HCL X1 TABS 300MG ACTAVIS; WELLBUTRIN 150 MG SR; BUPROPION 75 MG APOTEX; MYLAN BUPROPION; BUPROPIONM; BUPROPION HCL 75MG APOTEX; BUPROPION HCL ER 150 MG ACTAVIS LABORATORIES; WELLBUTRIN HCL SR; NOVO BUPROPION SR TABLETS; BUPROPION WELLBUTRIN SR ; BUPROPION HCL 150; BUPROPION HYDROCHLORIDE TABLET EXTENDED RELEASE; BUPROPION 100 MG SUN; BUPROPRION XL 150 MG; A DIFFERENT FORM OF WELLBUTRIN; WELLBUTRIN 300 XL; B UPROPION 75 MG GENERIC; BUPROPION ANDA 202775 ; BUPROPION 300 MG BUPROPION; BUPROPION XL 150 MG TABLET ACTAVIS; BUPROPION X1150; BUPROPRION SR 150 MG UNKNOWN; BUPROPION HCL 100MG; BUPROPRION HCL XL 150MG MG GLOBAL PHARM; BUPROPION HCL SANDOZ RETARD; BUPROPION XL WELLBUTRIN XL ; BUPROPRION 100MG; IC BUPROPION HCL 100 MG 100 M MYLAN; BUPROPION EXTENDED RELEASE 300MG; BUPROPION 150MG XL 150 MG; APLENZINE; BUPROPION HCL XL 150 MG 150 MG; BUPROPION XL 300MG TAB 24 HR 300 MG; WELLBUTRIN BUPROPION SR ; WELLBUTRIN GENERIC BUPROPION ; BUPROPION HCL SR 200MG TABLET 200 MG; WELLBUTRIN XL 300 MG TAB ER 24H; BUPROPION SR 150 MG; BUPROPION 150 MG; BUPROPION HCL XL TABS 300MG 300 MG; BUPROPION XL 00700502 ; BURPOPION HCL 300MG XL; BUPROPION FOLIC ACID; BUPROPION XL 150; NALTREXONEBUPROPION HCL; BUPROPION HCL ER SR 150 MG; BUPROPION HCL ER SR 12HR 100MG 100 MG; BUPROPRION XL 300MG GENERIC; BUROPION HCL XL WELLBUTRIN ; WELLBUTRIN RS; BUPROPION HYDROCHLORIDE XL 150 MG; BUPROPION XL 150MG; BUPROPION 300X1 300 MG VALEANT; BUPROPION 75 MG SANDOZ; BUPROPION XL TER 150MG 150 MG PAR PHARMA; BUPROPION EXTENDED RELEASE 300 300 MG; BUPROPION 150MG BID; WELLBUTRIN HCL XL; BUPROPION HCL XL 150; BUPROPION HCL XL 300; BUPROPION SR 150MG TABLETS 150 MG; BUPROPION EXTENDED RELEASE XL 300 MG; WELLBUTRIN XCL; BUPROPION 300 MG XL 300 MG PAR PHARMACEUTICALS; WELLBUTRIN IR; BUPROPION SR 150 MG 150 MG; BUP BUPROPION ; BUPROPION TABLETS; BUPROPION HYDROCHLORIDE EXTENDED RELEASE TABLETS USP SR SANDOZ; BUPROPION XL 150MG TABLET 150 MG ACTAVIS; WELLBUTRIN 100 MG TABLET; WELLBUTRIN 150 MG; WELLBUTRIN BUPROPION; BUPROPION HCL X 150 MG; BUPROPION 150MG SR; BUPROPION 250MG ER; BUPROPION 300MG XL; BUPROPION HCL X1 TABS 300MG 300 MG; BUPROPRION 300 MG ZYDUS; BUPROPION XL 300MG TER 300 MG ACTAVIS; BUPROPION XL WELLBUTRIN; BUPROPION XL 300MG 300 MG MFG PAR; BUPROPION HCI ER XL ; BUPROPION HCL EXTENDED RELEASE SR 150MG TABLETS SANDOZ ; BUPROPIONHYDROCHLORID HEXAL; BUPROPION NALTREXONE; BUPROPION EXTENDED RELEASE 150MG; BUPROPION HCL 150MG 24 H OUR SA 150 MG; BUPROPION HYDROCHLORIDE EXTENDED RELEASE TABLETS USP 150 MG; BUPROPION 100MG PILL; BUPROPION HCL SR 150 MG TAB RDS; BUPROPION HCL SR 150MG SANDOZ; WELLBUTRIN METOPROLOL; BUPROPION HCL SR 100 MG SOLCO HEALTHCARE; BUPROPION HCL XL PAR PHARMACEUTICALS; BUPROPION XL 150MG; BUPROPION HCL XL 300MG; BUPROPION HCL XL 300MG PAR PHARMACEUTICALS; BUPROPRION HCL XL TABS 150MG; BUPROPION HCL XL GENERIC FOR WELLBUTRIN PAR PHARM; BUPROPION SR SOLCO; BUPROPION BUPROPION XL; BUPROPION HCL 150MG XL; BUPROPION XL 300MG TABLETS ZYDUS; BUPROPION NON ABBVIE ; BUPROPION MIRTAZAPINE; BUPROPION HYDROCHLORODE XL; WELLBUTRIN XL GENERIC ; BUPROPION XL; BUPROPION HYDROCLORIDE; WELLBUTRIN EXT RELEASE; 150MG BUPROPION HCL; BUPROPION NGX ; BUPROPION XL ACTAVIS; BUPROPION EXTENDED RELEASE XL; WELLBUTRIN XL GENERIC ; BUPROPIN; BUPROPION HCL XL P A R PHARM; BUPROPION HYDROCHLORIDE 300 BUPR; BUPROPRION HCL ER XL 300; BUPROPION EXTENDED RELEASE; BUPROPION XL 300MG PAR PHARMACEUTICALS; BUPROPION HCL SR TABS 150MG; BUPROPION ER SR 150 MG TAB WAT; BUPROPION VS ESCITALOPRAM BUPROPION HYDROCHLORIDE XL ; BUPRO BUPRENORPHINE LOZENGE AMEX PHARMACY FLORIDA; GENERIC WELLBUTRIN BUPROPION; BUPROPIONE XL; BUPROPION HCL 300MG 24HR SA TAB; BUPROPION EXTENDED RELEASE TABLETS; BUPROPION 450; WELLBUTRIN XI; BUPROPION HYDROCHLORIDE SANDOZ; BUPROPRION XL 150MG; BUPROPION WELLBUTRIN SR; BUPROPION HCL XL 150 MG; BUPROPION HCL 300 MG TABLET; BUPROPION HCL ER XL 300MG TB24; BUPROPION XL 150 MG TAB 30; WELLBUTRIN XLJ 300 MG TABLET; EXELON PATCH BUPROPION HCL; BUPROPIONHCL; BUPROPION NEURAX; BUPROPION 24 HOUR EXGTENDED RELEASE; BUPROPION SR 150MG TABLETS 12H ; BUPROPION XL 150MG 24HR; BUPROPIOM; BUPROPRION HCL XL 150 MG; WELLBUTRIN GENERIC ; MYSIMBA MARKETED AS CONTRAVE NDA 200063 IN US; BUPROPION 00700502 ; BUPROPION HYDROCHLORIDE MANUFACTURED BY SANDOZ ; WELLBUTRIN XL 300 IN OBLONG GENERIC FORM; WELLBUTRIN XL 150 IN OBLONG GENERIC FORM; BUPROPION HCL EXTENDED RELEASE; BUPROPION HCL XL 150MG TABLET; WELLBUTRIN ANTI DEPRESSANT; BUPROPION HCL ER SR DEP ; MYSIMBA; WELLBUTRIN CHANTIX; BUPROPION SR 150MG TABLET; BUPRION; GENERIC WELLBUTRIN SR; BUPROPRION WELLBUTRIN ; HUMIRA BUPROPION AMITRIPTYLINE; BUPROPRION HYDROCHLORIDE; BUPROPN HCL TAB 300MG XL; BUPROPION HCL XL 150 300; BUPROPION HCL 300MG XL TAB CIP; GENERIC BUPROPION HCL XL ; BUPROPION XL 300 MG TER; BUPROPION XL 300 EXT RELEASE; BUPROPRIAN; BUPROPION XL 150 MYLAN ; BUPROPION 150MG; BUPROPION HYDROCHLORIDE EXTENDED RELEASE TABLETS; BUPROPION SR 100 MG 12HR; BUPROPION XL TAB 150MG 24HR; BUPROPION XL TABLETS; BUPROPIAN HCL XL 300 MG; BUPROPION HCL SR 150MG; BUPROPION XL 150MG TABLETS 24H ; BUPROPION XL 300 MG; MYLAN BUPROPION XL 150MG; BUPROPION HCL SR 200 MG; WELLBUTRN BUPROPIONXL; BURPROPION; BUPROPION SR 75MG 100MG; BUPROPION XL 150MG 300MG; BUPROPION HYDROCHLORDE; BUPROPION HCL ER SR 150MG TB12; BUPROP 12 SR; BUPROPION SR 200MG; WELLBUTRIN PRAZOSIN; BUPROPION HCL SR TABLS 150MG GENERIC FOR WELLBUTRIN SR TABLS; WELLBUTRIN S; WELLBUTRIN HCL XL 150; BUPROPION LX TAB 300 MG; BUPROPION SR 150MG TABLETS; BUPROPION 150 XL GLOBAL PHARMACY ; BUPROPION ER SR; BUPROPRIONXL; BUPRORIONXL; BURPROPION XL 300MG; BUPROPION HCL TB2; CONTRAVE GENERIC NALTREXONE HCL BUPROPION HCL; SYNTHESIS WELLBUTRIN XL; BURPROPION HCL ER 12HR 150 MG TAB SOLC; BUPROPION HYDROCHLORIC ETENDED RELEASE; BUPROPION SR 100 MG TABLETS 12H ; BUPROPION HYDROCHLORIDE SUSTAINED RELEASE; BUPROPION HCL TAB 300XL; MYSIMBA NALTREXONE HCL BUPROPION HCL PROLONGED RELEASE TABLETS; BUPROPION HCL XL 300 MG TABLETS; BUPROPION HCL XL A 101; ELONTRIL MODIFIED RELEASE TABLET; BUPROPION SUSTAINED RELEASE; BUPROPION SR 200MG TABLETS 12 HR ; BUPOPRION; BURPOPION; BUPROPION XL 150MG TAB 30; BUP BUPROPION HYDROCHLORIDE ; GENERIC WELLBUTRINE XL; NALTREXONE HYDROCHLORIDE BUPROPION HYDROCHLORIDE; WELLBUTRIN BUPROPION; BUPROPION HCL XL 150MG; BUPROPION 150 MG XL; BUPROPION HCL 150MG 24HR SA TAB; BURPROPION SR; BUPROPION RL; WELLBUTRIN TAB XL; BUPROPION SR WELLBUTRRIN SR; WELLBUTRIN SR GENERIC FORM; BUPROPION HCL EXTENDED RELEASE SR TAB 200MG; BUPROPIONATE; BUPROPIONUM; BURPROPN HYDROCHLORIDE 300 MG; BUPROPION XL 300 MG TAB ER 24H; BUPROPION HYDROCHLORIDE 24 HR BUPROPION HYDROCHLORIDE 300 MG EXTENDE; BUPROPION SR 150MG TABLETS 12 H GENERIC FOR WELLBUTRIN; BUPROPRION ER 100MG; BUPROPION XL 300 MG TABLET; BUPROPION HCI ER XL; SOLCO BUPROPION SR 200MG; BUPRIOPION 300MG XL; CONTRAVE 8 90 MGS; XANAX WELLBUTRIN; BUPROPION 100 MG; BUPRPION XL; BUPROPION 1131A ; BUPROPN HCL X; BUPROPION XL 150 MG PO DAILY; BUPROPION MYLAN; ACT BUPROPION XL; BUPROPIOM HCL 75 MG; BUPROPION XL 150MG TAB DR; BUPROPPION; BUPROPION HYDROCHLORIED EXTENDED RELEASE TABLETS; BUPROPION GENERIC WELLBUTRIN ; BLINDED BUPROPION; BUPROPION HYDROCHLORIDE EXTENDED RELEASE; BUPROPION WELLBUTRIN; BUPROPION MYLAN ; BUPROPION HCI XL ; BUPROPION IR; BUPROPION 75MG TABLETS; CONTRAVE ER 8 90MG TABLETS; BUPROPION XL MFG ACTAVIS OVAL WHITE TABLET WITH 142 ON IT ; BUPROPION HCL BOTH THE 300 AND 150 MG CODE ON PILLS IS A 101 A 102; BUPROPION XL GENERIC FOR WELLBUTRIN XL DECREASED OVER 3 MOS ; ZYBAN ER; GENERIC WELLBUTRIN XL 150 MANUFACTURED BY CIPLA; BUPROPRION SR 150 MG TAB; DR REDDY BUPROPRION XL 150 WHITE ROUND PILLS IMPRINTED WITH 144; BUPROPION XL 150; BUPROPION 150 XL PAR; BUPROPION ER SR 150 MG TAB WAT WII 839; BUPROPON XL; BUPROPION HCL XL 300 MG TABLET; BUPROPION 75MG; WELLBUTRIN XL ; BUPROPION SR XL; BYPROPION HCL XL WELLBUTRIN ; WELLBUTRIN HYDROXYZINE; BUPROPION XL IMPAX GEN; MYCOPHENOLAT CONTRAVE CITALOPRAM; BUPROPRION HCL 100 MG TAB MFR MYLAN; BUPROPION HCL 75MG TAB; BUPROPION HYDROCHLORIDE XL PROLONGED RELEASE TABLET; VOXRA 150 MG MODIFIED RELEASE TABLET; 100MG OF WELLBUTRIN BID; BUPROPION 200MG D; BUPROPION 300MG; BUPROPION HCL CO TAB 150MG; ZOFRAN WELLBUTRIN; BUPROPION STRENGTH UNKNOWN ; MYSIMBA NALTREXONE HCL BUPROPION HCL PROLONGED RELEASE TABLET; BUPROPION HCL XL TABLS 300MG GENERIC FOR WELLBUTRIN XL TABS 300MG; WELLBUTRIN ; LAMOTRIGINE TRAMADOL BUPROPION; VERAPAMIL WELLBUTRIN LAMOTRIGINE; BUPROPION HCL XL 300MG TABLET GENERIC FOR APLENZIN WELLBUTRINXL; BUPROPION XL 150 MG 3 PILLS AM 450 MG ; BUPROPION HCL 75 MG TABLET; BUPROPRION SR 100MG; BUPROPION FUROSEMIDE; BUPROPION HCL XL 300MG MADE BY CIPLA USA INC MARKED I 71; WELLBUTRIN SLOW RELEASE; BUPROPION ER SR 150MG TAB; WELLBUTRIN 100 BID; BUPROPRION HCL SR 150 MG TABLET; BUPROPION HYDROCHLORIDE ER TABLET USP; WELLBUTRIN SR 200MG; UNSPECIFIED GENERIC FOR WELLBUTRIN XL; BUPROPION GENERIC VERSIONS OF WELLBUTRIN XL ; IBUPROPION WELLBUTRIN ; BUPROPION HYDROCHLORIDE NALTREXONE HYDROCHLORIDE; WELLBUTRIN XL 150; BUPRON SR 150 MG; BUPROPION HERITAGE PHARMACEUTICALS ; BUPROPION HCL XL 150 MG TABLET EXTENDED RELEASE 24 HR; BUPROPRION HCL XL 300 MG TABLET EXTENDED RELEASE; BUPROPION HYDROCHLORIDE EXTENDED RELEASE TABLES XL 150; BUPROPION HCL XL TABS 150MG GENERIC FOR WELLBUTRINXL TABS; WELLBUTRIN 300XL ; BUPROPION XL 150 300MG; LEVOTHROXIN BUPROPION RISPERIDONE; BUPROPION TAB 100 MG; BUPROPION HCL BUPROPION; BUPROPION HYDROCHLORIDE EXTENDED RELEASE TABLETS ACTAVIS; BUPROPION TEVA; TEVA BUPROPION XL; BUPROPION XL TAB 150 MG; BUPROPION SR BUPROPION HCL SUSTAINED RELEASE; BUPROPION HCL EXTENDED RELEASE BUPROPION EXTENDED RELEASE; BUPROPION XL BUPROPION XL; BUPROPION ER 300 MG; THREOBUPROPION; CLOVETASOL PROAIR WELLBUTRIN SYNVISC ADVAIR ENBREL; BUPROPION RETARD; BUPROPION XL 300MG DAILY; BUPROPION; BUPROPION HCL SR 150 MG TABLET; CONTRAVE 8 90 MG TABLET; BUPROPION HCL 75MG TABLET DEA CLASS LEGEND RX; WELLBUTRIN 450 MG QD; BUPROPION 100MG ER; BUPROPION ER 150MG TAB DR; BUPROPION HCL XL 24HR 150M G TAB LUPI; BUPROPION HCLXL 300 MG TABLET; BUPROPN HCL 300MG XL SUBSTITUTED FOR WELLBUTRIN XL 300MG; BUPROPION HCL 100MG SR; BUPROPION HYDROCHLORIDE WATSON ; BUPROPION HCL TEVA; BUPROPION SR 150 MG; BUPROPION TAB 150MG SR; BUPROPION HYDROCHLORIDE EXTENDED RELEASE TABLET; BUPROPION HCL ACTAVIS; WELLBUTRIN XL 300MG TABLETS; BUPROPION HCL SANDOZ RETARD 300 MG TABLETTEN MET GEREGULEERDE AFGIFTE; BUPROPION XL 300 MG 24 HR TABLET; BUPROPION XL 150 MG TABLET; BUPROPION XL 150MG 1 TABLET PO DAILY; BUPROPION HCL XL 150 MG; BUPROPION XL 450 MG TABLETS; BUPROPION WATSON; GENERIC BUPROPION; BUPROERTAB A BUPROPION ; BUPROPION EXTENDED VELCASE; BUPROPION HCL 300 MG SA; BUPROPION SA 300 MG; BUPROPRION XL 300MG TABLETS; BUPROPION HCG TAB 300 XL; BUPROPION HYDROCHLORIDE SR 200 MG; BUPROPION 200MG SR TABLETS; WELLBUTRIN MYRBETRIQ LIVALO PANTOPRAZOLE ANTIBIOTIC SYNTHROID ; ACTAVIS BUPROPION 300XL; WARFARIN WELLBUTRIN; BUPROPION 150MG; BUPOPION; WELLBUTRIN 100 MG 2; IC BUPROPION HCL SR 150 MG; BUPROPION HORIZONTAL RECTANGLED SHAPE; BUPROPION AND NALOXONE SUBLINGUAL FILM 8MG 2MG; 300 MG BUPROPION XL GENERIC FOR WELLBUTR N; BUPROPION HCL 75MG; BUPROPION 150; WELLBUTRIN TAB 150MG SR; BUPROPION HYDROCHLORIDE EXTENDED RELEASE TABLES USP XL ; BUPROPION HCL EXTENDED RELEASE TABLETS XL 150 MG ONCE DAILY ; BUPROPION MODIFIED RELEASE TABLETS; NO BUPROPION XL; BUPROPION 100MG BID; BUPROPION HCL WELLBUTRIN; BUPROPION YH102; WELLBUTRIN 300 MG; ADVAIR BENZOCAINE BUPROPION; WELLBUTRIN TAB XL; BUPROPION 150 MG SR DAILY; WELLBUTRIN TAB; BUPROPION TAB 150 MG XL; BUPROPION NALTREXONE 8MG 2MG; WELLBUTRIN 150; BUPROPION 100MG TABLETS; LEVOTHYROXIN CYMBALTA WELLBUTRIN; ELONTRIL 300MG; BUPROPRION HYDROCHLORIDE WE XL 24HR 150; BUPROPION XR MODIFIED RELEASE TABLET; BUPROPION POW HCL; BUPROPION SR TABLET 200 MG; BUPROPION 150MG XL; BUPROPION XL 300MG CIPLA; BUPROPION SR 200MG ; BUPROPION HCL 150MG 300MG; LOSARTAN POTASSIUM BUPROPION HCL DULOXETINE; WELLBUTRIN QUESTRAN CYMBALTA XIFAXAN; BUPROPION TAB; WAL ZYR WELLBUTRIN ZORTRESS; BUPROPION ACCORD; BUPROPION 150 SR; BUPROPION HCI EXTENDED RELEASE TABLETS XL 150 MG ONCE DAILY ; BUPROPION EXTENDED RELEASE XL TABLET; BUPROPION 150 MG 24HR TABLET; BUPROPION HYDROCHLORIDE EXTENDED RELEASE TABLETS USP XL; APLENZIN ORAL TABLET ER 24 HOUR 348; ELONTRIL 150MG 30 COMPRIMIDOS LIBERACION MODIFICADA; WELLBUTRIN 100 MGS; BUPROPION SUSTAINED RELEASE BUPROPION ; BUPROPION HCL WL TABS 300 MG; WELLBUTRIN TAB XL 150 MG; WELLBUTRIN XL 300MG QAM; BUPROPRION XL 300MG TAB ACT; BUPROPION 300MG TABLET 24HR ; WELLBUTRIN XR GENERIC ; BUPROPION EXTENDED RELEASE SR TABLETS; BUPROPION HYDROCHLORIDE EXTENDED RELEASE TEVA; BUPROPION HCL SR SC; BUPROPION SR 100MG; A COMPOUNDED PREPARATION WHICH BUPROPION; COMPOUNDED PREPARATION INCLUDES BUPROPION; TEVA BUPROPION HYDROCHLORIDE EXTENDED RELEASE; BUPROPION HCS; BUPROPION XL TAB 150 MG 24 HR GENERIC FOR WELLBUTRIN XL TAB 150 MG; BUPROPION EXTENDED RELEASE EXTENDED RELEASE ACTAVIS; GENERIC WELLBUTRIN SR 100MG; GENERIC OF WELLBUTRIN; BUPROPION XL ACCORD; WELLBUTRIN 100MG 2X DAY; WELLBUTRIN XL ER; BUPROPION XL TABLET; BUPROPRION XL 300MG TAB ANC; BUPROPRION XR; BUPROPION TAB 100MG; TEVA BUPROPION HYDROCHLORIDE EXTENDED RELEASE TABLETS; BUPROPION HCL 150 MG TABLET; BUPROPION HCL SR 100MG; BUPROPION 150MG DAILY; VOXRA 150 MG TABLETT MED MODIFIERAD FRIS TTNING; GENERIC OF WELLBUTRIN SR; BUPROPION HCL SR 100 MG; BUPROPION SR TABLETS 200MG; 70436 011 02 BUPROPION HYDROCHLORIDE ER TABLET USP XL 300 MG; BUPROPION XL 150 MG DAILY; BUPROPION TABLET MET GEREGULEERDE AFGIFTE 150 MG MILLIGRAM ; BUPROPION HYDROCHLORIDE XL 300MG TAB ACT; BUPROPION 450MG; BUPROPION HYDROCHLORIDE EXTENDED RELEASE TABLETS USP SR 150 MG; BUPROPION 100MG; BUPROPION GENERIC SR; BUPROPION 200MG SR; BUPROPION BUPROPION HCL 100MG 12HR TAB SA ; BUPROPION ER 100MG; BUPROPION HYDROCHLORIDE E; BUPROPION 150 MG 24 HR TABLET; BUPROPION BUPROPION HCL 150MG 24 HR TAB SA ; BUPROPION SR; ADHD ZYBAN; BUPROPION SR 50MG; BUPROPION EXTENDED RELASE; BUPROOPION HYDROCLORIDE XL 150MG; BUPROPION XL 300MG 24 HOUR TABLET; BUPROPION XL 300 MG; BUPROPION HBR; BUPROPION HCL TAB 300 MG XL; BUPROPION HCL EXTENDED RELEASE TABLETS USP XL 300 MG; BUPROPION XL TEVA; B UPROPION HCL EXTENDED RELEASE TABLETS USP XL 300MG TB24; IC BUPROPION HCL XL 150MG TABLET; BUPROPION 100MG SR; BUPROPION HIDROCLORURO 1131CH ; BUPROPION HYDROCHLORIDE TEVA; BUPROPION 300MG XL TAB; ANCHEN BUPROPION; NALTREXONE BUPROPION; BUPROPION HCL TAB 150MG; BUPROPION HCL ER XL WELLBUTRIN ; BUPROPION 150 MG DAILY; BUPROPION EXTENDED RELEASE XL TEVA; LINZESS WELLBUTRIN; WELLBUTRIN SR TABS 1 2X 200MG; BUPROPION XR 450 GM; BUPROPION HLC XL GENERIC FOR NORVASC; BUPROPION 180 MG NALTREXONE 16 MG; IC BUPROPION HCL XL 300 MG TABLET; BUPROPION 75 MG TAB; BUPROPION BUPROPION HCL 300MG 24 HR TAB SA ; DETROL LA 4MG BUPROPION ER 150MG; BUPROPION XL 150MG TABLET; BUPROPION ER 300MG; BUPROPIONE SANDOZ; BUPROPION XL 300 MG TAB; BUPROPION HYDROCHLORIDE EXTENDED RELEASE USP XL ; IBUPROPION TAB 75MG; BUPROPION BUPROPION SMOKE CESSATION 150MG 12HR TAB SA ; WELLBUTRIN SYNTHESIS; BUPROPRION 300MG ANCHEN; WELLBUTRIN 300 ER; BUPROPION XL TAB; BUPROPION HYDROCHLORIDE 300MG AND 150MG TABLETS MADE BY LUPIN; BUPROPION CLONAZEP ODT; BUPROPION 300 MG XL; BUPROPION 300MG 24 HOUR RELEASE TABLET; CONTRAVE ENTERAL NUTRITION; BUPROPION XL WELLBUTRIN XL 300MG DAY; WELLBUTRIN 50MG; CIPROFLOXACIN ASPIRIN LOW DOSE NEXIUM BUPROPION; BUPROPION 150MG TWICE DAILY; AUVELITY; BUPROPION XL 150 MG TABLET AB3 ; BUPROPION SANDOZ BUPROPION HYDROBROMIDE ; BUPROPION HCL ER 150MG 24HR TABLET; BUPROPION XL 150MG TABLETS 24 H ; TARO BUPROPION XL; BUPROPION ER 150MG; BUPROPION HCL EXTENDED RELEASE BUPROPION HCL EXTENDED RELEASE HCL; BUPROPION SR BUPR OPION HCL EXTENDED RELEASE SR ; BUPROPION BUPROPION HCL150MG 12HR TAB SA ; BUPROPION HCL XL TABLETS 300 MG; WELLBUTRIN BUPROPION HCL ER XL 150 MG ; BUPROPION HCL EXTENDED RELEASE TABLETS; WELLBUTRIN 450MG QAM; HYDROXY BUPROPION; BUPROPION 300 XL; BUPROPRION 100MG 12HR; BUPROPION HYDROCHLORIDE SR 150 MG; BUPROPION X; BUPROPION HCI ER; WELLBUTRIN SR 300 MG; WELLBUTRINE; WELLBUTRIN METOPROLOL TARTRATE LAMOTRIGINE PROPAFENONE SYNTHROID; BUPROPRION HCL XL 300; WELLBUTRIN 50 MG; WELLBUTRIN 300MG; BUPROPRION 150 MG; BUPROPION HYDROCHLORIDE XL ACTAVIS; WELLBUTRIN 200 MG; BUPROPION HYDROCHLORIDE XL TEVA; BUPROPION 150MG 300MG; BUPROPION XLR 300 MG; BUPROPION HCL 75 MG 2 TIMES DAILY; BUPROPION ER XL ; BUPROPION XL 150MG 300MG TABLETS; BUPROPION ER HCL; BUPROPION HYDROCHLORIDE BUPROPION HYDROBROMIDE ; BUPROPION HCL ER XL 150MG TB24 SUBSTITUTED FOR WELLBUTRIN XL 150MG ; BUPROPION HCL TAB300MG XL; BUPROPRION ACCORD; BUPROPION HCL ER XL ORAL TABLET EXTENDED RELEASE 24 HOUR 150 MG; BUPROPION 300 MG XR; BUPROPION HCL 300 XL; BUPROPION BUPROPION HCL ; BUPROPION BUPROPION HCL 150MG 12HR TAB SA ; MYSIMBA NALTREXONE HCL BUPROPION HCL PROLONGED RELEASE; BUPROPION 200MG BID; BUPROPION HCL SANDOZ; BUPROPION ER ; BUPROPION HYDROCHLORIDE EXTENDED RELEASE ACTAVIS; BUPROPION HYDROCHLORIDE EXTENDED RELEASE TABLETS USP SR ; BUPROPION HCL XL 300MG TAB; BUPROPION BUPROPION HCL 150MG 24HR TAB SA ; BUPROPION XL150MG TABLETS; BUPROPION BUPROPION HCL 300MG 24HR TAB SA ; BUPROPION HCL ER; BUPROPION SANDOZ BUPROPION HYDROCHLORIDE ; WELLBUTRIN BUPROPION GENERIC ; BUPROPIONE HCL; BUPROPION 24HR XL; BUPROPION HCI ER SR 100 MG TAB ACTA; BUPROPION HCL75 MGTAB AVET; BUPROPION SR SUSTAINED RELEASE ; BUPROPION ER SR 150MG TAB; SUPER B VISTARIL GARLIC WELLBUTRIN FISH OIL LEXAPRO ESCITALOPRAM; BUPROPION BUPROPION HCL 100MG 12HR TAB SA ; METHOTREXATE BUPROPION XL BUSPIRONE FOLIC ACID; BUPROPION HCL 300MG; BUPROPION HYDROCHLORIDE EXTENDED RELEASE 300MG; BUPROPION XL 150MG; DOSIER BUPROPION HYDROCHLORIDE ; WELLBUTRIN XL 450MG; BUPROPION HCL XL ACTAVIS; BUPROPION BUPROPION HCL 150MG 12HR TABS SA ; BUPROPION SR XL; BUPROPION HCL ER 150MG SLATE RUN PHARMACEUTICALS; BUPROPION TABLET 75 MG; BUPROPION HCL ER XL ORAL TABLET EXTENDED RELEASE 24 HOUR 300 MG; BUPROPION HYDROCHLORIDE SR TABLETS; BUPROPION HCL ER XL 24HR GENERIC FOR WELLBUTRIN XL; WELLBUTRIN RETARD TAB MODIF FRISETTING 300 MG; BUPROPION TABLET MGA 300MG WELLBUTRIN XR TABLET MGA 300MG; BUPROPION XL 300MG PO QAM; BUPROPION HCL 100 MG TABLET; BUPROPION HCL XL 150 MG; BUPROPION XL 300 MG DAILY; BUPROPION HCL ER XL 150MG TB24; VENTOLIN VITS B C D E WELLBUTRIN ZYRTEC; WELLBUTRIN XL ER 24H; WELLBUTRIN BUPROPION XL ; BUPROPION SR ER; WELLBUTRIN 450 MG; WELLBUTRIN XR 150MG; BUPROPION NEURAXPHARM; LENVIMA NADOLOL XIFAXAN METOLAZONE SPIRONOLACTONE BUPROPION; BUPROPION TABLET MGA 300MG BRAND NAME NOT SPECIFIED; BUPROPION TABLET MGA 150MG BRAND NAME NOT SPECIFIED; BUPROPION BUPROPION HCL 300MG 24HR TAB SA ; BUPROPION HYDROCHOLRIDE ACTAVIS; IC BUPROPRION HCL SR 150 MG TABLET; BUPROPION HCL ER XL 24 HR 150 MG TAB; BUPROPION HCI 150MG; BUPROPION 150 XL; BUPROPION THREO AMINO METABOLITE; BUPROPION ERYTHRO AMINO METABOLITE; WELLBUTRIN TAB XL 150MG; ZETRON BUPROPION ; BUPROPION BUPROPION HCL 300MG 24HR TABS SA ; BUPROPION HCL SR 100MG TWICE A DAY SUB FOR WELLBUTRIN SR ROUND BLUE; BUPROPION HYDROCHLORIDE EON LABS ; BUPROPION HCL XL 150 MG EXTENDED RELEASE; BUPROPION EBB 150 MG TABLETT MED MODIFIERAD FRISATTNING; WELLBUTRINXL 150 MG; BUPROPION HCL ER XL AND SR ; BUPROPION XL 150 MG; LUPIN BUPROPION XL 300MG; WELLBUTRIN SP; BUPROPION 2018 ; BUPROPION HYDROCHLORIDE EXTENDED RELEASE TABLETS; WELLBUTRIN NON ABBVIE ; WELLBUTRIN 100 XL GENERIC; WELLBUTRIN 300 XL GENERIC; BUPROPION HYDROCHLORIDE TABLETS USP 75 MG; BUPROPION XR 300 MG; ONCE DAILY BUPROPION HCL EXTENDED RELEASE TABLES USP XL ; BUPROPION XL 300 MG QD; BUPROPION 300MG ONCE A DAY; WELLBUTRIN XR 300MG DAY; BUPROPION HCL 300 MG; BUPROPION HYDROCHLORIDE ANDA 207403 ; BUPROPION 300 XL GENERIC ; BUPROPION XL300; BUPROPION HCL SR 150 MG; WELLBUTRIN 75MG; BUPROPION ER SR 150MG TAB WAT; BUPROPION TAB 100MG SR; BUPROPION OR GENERIC OF WELLBUTRIN; RAN BUPROPION XL; WELLBUTRIN XL 300 MG PO; BUPROPRION WELLBUTRIN XL 450 MG TAKE 1 TABLET PO QD; ALBUTEROL AER BUPROPION; BUPROPION XL 00700502 ; NALTREXONE HYDROCHLORIDE AND BUPROPION HYDROCHLORIDE EXTENDED RELEASE; WELLBUTRIN ZOVIRAX; WELLBUTRIN XL 300MG 1 TAB PO QAM; APLENZIN 522MG PO QAM; BUPROPIONI HYDROCHLORIDUM; WELLBUTRIN XL 300 MG ; LILETTA IUD BUPROPION XL; WELLBUTRIN WR; BUPROPION 100 MG ONCE DAILY; BUPROPION PHARMA; BUPROPION TABLET MGA 150MG WELLBUTRIN XR TABLET MGA 150MGWELLBUTR ; BUPROPION WELLBUTRIN 75 MG ORAL DAILY; BUPROPION ER 150MG; WELLBUTRIN XL 300 MG DAY; BUPROPION SANDOZ 150 MG MODIFIED RELEASE TABLETS; WELLBUTRIN TAB 100MG; 150MG BUPROPION XL; BUPROPION SR WELLBUTRIN SR 150 MG 12 HR TABLET; WELLBUTRIN XL 300 MG DAILY; BUPROPION SR ANTIDEPRESSANT; WELLBUTRIN 150 MG COMPRESSE A RILASCIO MODIFICATO ; BUPROPION HCL XL ER EXTENDED RELEASE ORAL TABLET; BUPROPION HYDROCHLORIDE HCL ; BUPROPION HYDROCHLORIDE ER XL TAB 150MG; BUPROPION XR 150 ADCO; BUPROPION 150MG ER TABLET; WELLBUTRIN TAB SR; BUPROPION HCI BUS PIRONE; BUPROPION 300MG QD; BUPROPION 300 MG TABLET 24 HR ; BUPROPION HCI; BUPROPION XR 450 MG DAILY; BUPROPION 150MG BUSPIRONE 7 5MG; GENERIC BUPROPION XR; WELLBUTRIN 100 SR ; WELLBUTRIN 150 MG ONCE DAILY; WELLBUTRIN 300; BUPROPION CINFA; BUPROPION HCL XL 150 MG 24 HR TABLET EXTENDED RELEASE TAKE 1 TABLET B; WELLBUTRIN 150MG XR; BUPROPION ZONISAMIDE; BUPROPION SR 150MG PO BID; BUPROPION XL 150MG QD; BUPROPION HCL 300MG 1 PER DAY; BUPROPION HCL SR 150 MEG; 300 MG BUPROPION XR ONCE DAILY; BUPROPION XL 300 MG ONCE DAILY BY MOUTH; ELONTRIL BUPROPION HYDROCHLORIDE RETARD ; BUPROPION HUMALOG; WELLBUTRIN XL BUSPAR; BYPROPION HCL WELLBUTRIN XL ; WELLBUTRIN 300MG XL TABLET; BUPROPION HCL 300MG XL; WELLBUTRIN XL 300MG BUPROPION ; WELLBUTRIN S TB1; WELLBUTRIN 150MG TWICE DAILY; BUPROPION 150MG SR ORAL TABLET; BUPROPION HYDROCHLORIDE E BUPROPION XL 300MG; BINEX BUPROPION HCL ER; BUPROPION HC; CLORIDRATO DE BUPROPIONA; WELLBUTRIN 300 MG ER; WELLBUTRIN 300MG ONCE DAILY; BUPROPION HCL SR 150 MG 2 DAY ; BUPROPION HCL TAB 300MG XL; WELLBUTRIN S TB1 200MG; BUPROPION HCL SR 150 MG TAB SR 12H; WELLBUTRIN XL 150 MG DAILY; WELLBUTRIN XL 150MG ORAL; BUPROPION PILL; BUPROPION XL 150MG TABLETS; WELLBUTRIN SR 150 MG TAB SR 12H; SLATE RUN BUPROPION; WELLBUTRIN TAB 100MG SR; WELLBUTRIN 150MG XL 1 ; WELLBUTRIN 150MG ONE DAILY; INVEGA INTERACTS W WELLBUTRIN; INVEGA ELIMINATED WELLBUTRIN EFFECT OF REDUCING SMOKING URGE; BUPROPIONHYDROCHLORIDE; WELLBUTRIN 450MG DAILY; ZETRON BUPROPION HYDROCHLORIDE ; BUPROPION 300MG 1X DAY; PSYCHOTHERAPEUTIC DRUGS ADDERALL WELLBUTRIN ; WELLBUTRIN XL; WELLBUTRIN XL TAB ER 24H; BUPROPION HCL 100 MG; BUPROPION XL 24 HR 150 MG; WELLBUTRIN SR 12H; BUPROPION CL XL; BUPROPION APOTEX; WELLBUTRIN HCL 75MG QD; BUPROPION METHYLCOBALAMIN NALTREXONE PHENTERMINE TOPIRAMATE; SKYLA IUD WAS ON WELLBUTRIN 200 MG; WELLBUTRIN SR 200 MG; BUPROPION HC TB1 150MG; BUPROPION XL 300 MG DAY; ANASTROZOLE BUPROPION; WELLBUTRIN FOR A WHILE PROLOL ; WELLBUTRIN TB1; WELLBUTRIN 150 MG EXTENDED RELEASE 24H LATANOPROST 0 005 EYE DROPS; ACCORD BUPROPION; BUPROPION SR 450 MG DAY; WELLBUTRIN 150MG DAILY; BUPROPION ER 150 MG; BUPROPION HCL XL; WELLBUTRIN ER 300 MG; BUPROPION HCL XL BUPROPION HYDROCHLORIDE ; BUPROPION HCL 300 MG ; WELLBUTRIN XL 3; WELLBUTRIN XL 150M; XR WELLBUTRIN SID; WELLBUTRIN 300MG XL DAILY; ELONTRIL BUPROPION ; WELLBUTRIN XL ER 24 HR; BUPROPION XL ER 24HR; WELLBUTRIN 300MG 1 TABLET PO QAM; NP THYROID LEXAPRO WELLBUTRIN LINZESS; BUPROPION SR 150 MG TABLETS; BUPROPION 150MG XL DAILY; WELLBUTRIN 75; BUPROPION TAB SR; HYDROXYBUPROPION ; BUPROPION WELBUTRYN XL; WELLBUTRIN EXTENDED RELEASE; WELLBUTRIN BUPROPION XL; BUPROPION DEXTROMETHORPHAN; BUPROPION XL 450 MG DAILY 300 150 MG ; WELLBUTRIN EMGALITY; BUPROPIONHCL ER; BUPROPION XL 300 MG EXTENDED RELEASE; BUSPIRONE 15 MG BUPROPION 450 MG; BUPROPION 450 MG; BUPROPN HCL GENERIC FOR WELLBUTRIN; BUPROPION BLUEFISH; BUPROPION 100 MG PO BID; BUPROPION HCL XL 150MG 24 HOURS TABLET EXTENDED RELEASE; BUPROPION TAB 200MG SR; BUPROPION HYDROCHLORIDE 150 MG TAB XL; SYNTHROID WELLBUTRIN; BUPROPION HCL XL 300 MG TAB ER 24 TAB; WELLBUTRIN XL 300 MG TAB 24H; BUPROPION 450 MG PO DAILY; BUPROPION BETA; BUPROPION ER XL ; BUPROPION CHLORIDE; ODAN BUPROPION SR; AUVELITY TABLET ER 45 105 MG; WELLBUTRIN 150MG; BUPROPION 150MG XR; WELLBUTRIN XL 150MG ONCE DAILY; WELLBUTRIN UNSPECIFIED BUPROPION HYDROCHLORIDE; WELLBUTRIN BUPROFEN HYDROCHLORIDE ; WELLBUTRIN XR BUPROPION HYDROCHLORIDE ; WELBUTRIN BUPROPION HYDROCHLORIDE ; BUPROPION HYDROCHLORIDE BYPROPION HYDROCHLORIDE ; BUPROPION HYDROCHILORIDE BUPROPION HYDROCHLORIDE ; WELLBUTRIN BUPROPION HYDROHCLORIDE ; WELLBUTRIN BUPORPION HYDROCHLORIDE ; BUPROPION AMFEBUTAMONE ; WELBUTRIN BUPROPION HYDROCHLORIDE TABLETS; WELLBUTRIN UNKNOWN ; WELLBUTRIN W PAXIL; BUPROPION HYDOCHLORIDE; WELLBUTRIN BUPROPION HYDROCHLORIDE CAPLET; WELLBUTRIN AMFEBUTAMONRE HYDROCHLORIDE ; BUPROPRION AMFEBUTAMONE ; WELLBUTRIN BUPRINION HYDROCHLORIDE ; WELLBUTRIN SR GENERIC ; WELLBUTRIN IBUPROFEN HYDROCHLORIDE ; WELLBUTRIN BUPROPION HYDROCHLORIDE UNKNOWN BUPROPION HYDROCHLORID; WELLBUTRIN BUPROPION HYDRODHCLORIDE ; WELLBUTRIN XL WELLBUTRIN XL ; WELLBUTTRIN XL BUPROPION HYDROCHLORIDE ; WELLBUTRIN BUPRION HYDROCHLORIDE ; WELLBUTRIN BUPROPION HYDROCHLORIDE TABLETS; BUPROPION HYDROCHLORIDE AMFEBUTAMONE HYDROCHLORIDE ; BUPROPION AMFEBUTAMONE ; WELLBUTRIN BUPROPIONATE HYDROCHLORIDE ; WELLBUTRIN BUPROPION HYDOCHLORIDE ; WELBUTRIN BUPROPION HYDROCHLORIDE; BUPROPION LONG ACTNG BUPROPION ; BUPROPION HYDROCHLORIDE TABLET CONTROLLED RELEASE BUPROPION HYDROCHLO; WELLBUTRIN XL TABLET EXTENDED RELEASE BUPROPION HYDROCHLORIDE ; WELLBUTRNI BUPROPION HYDROCHLORIDE ; WELLBUTRIN BUPRIOPRION HYDROCHLORIDE ; WELLBUTRIN XL BUPROPION HYDROCHLORIDE; WELBUTRIN BUPROPION HYDROCHLORIDE; BUPROPION HCL 150SR WATSON PHARMACEUTICALS; WELLBUTRIN BUPROPIN HYDROCHLORIDE ; WELLBUTRIN BUPROION HYDROCHLORIDE ; WELLBUTRIN BUPROFEN HCL ; BUPROPRION WELLBUTRIN SR ; BUPROPION 100; BUPROPION HYDROCHLORIDE SUSTAINED RELEASE BUPROPION HYDROCHLORIDE TA; WELLBUTRIN BUPROPION HYDRCHLORIDE ; WELLBUTRIN 300 MG AM; WELLUTRIN BUPROPION HYDROCHLORIDE ; ZYBAN SR BUPROPION HYDROCHLORIDE ; WELLBUTRIN BURPROPION HYDROCHLORIDE ; WELLBUTRIN AMFEBUTAMONE HYDROCHLORIED ; BUPROPION 10 MG; BUPROPION NGX BUPROPION ; WELLBUTRIN BUPROPION HYDROCHLORIDE0; WELLBUTRIN TABLETS SR; BUPROPION HYDROCHLORIDE BUPROPION HYDROCHLORIDE0; WELLBATRIN BUPROPION HYDROCHLORIDE ; BUPROPION 75 MG; BUPROPION SSR 150 MG; WELLBUTRIN BUPROPION TABLETS; BUPROPION 75 MG TWO TABS PO BID; ZYBAN GENERIC 150 MG BID; BUPROPION SR 100G; BUPROPION SR 150MG; BUPROPION ER 150MG ER EON LABS; BUPROPION HYDORCHLORIDE BUPROPION HYDORCHLORIDE ; WELLBUTRIN SLOW RELEASE BUPRION HYDROCHLORIDE ; BUPROPION SR 15; BUPROPION HYDROCLORIDE ; BUPRIPION HYDROCHLORIDE BUPROPION HYDROCHLORIDE ; WE BUTRIN BUPROPION HYDROCHLORIDE ; WEELBUTRIN BUPROPION HYDROCHLORIDE ; WELLBUTRIN XL BUPROPION HCL TABLETS GLAXO SMITH KLINE; BUPROPION 75MG; BUPROPION NGX BUPROPION ; BUPROPIOIN BUPROPION ; BUPROPION 75MG; BUPROPION HCL SR 200MG WATSON EXPRESS SCRIPT; WELLBUTRIN BUPROPION BUPROPION HYDROCHLORIDE ; WELLBATRIN AMFEBUTAMONE HYDROCHLORIDE ; WELLBUTRIN SLOW RELEASE AMFEBUAMONE HYDROCHLORIDE0; BUPROPION SR 150MG; BUPROPION 150MG; WELLBUTIN SR BUPROPION HYDROCHLORIDE ; BUPROPION HYDROCHLORIDE WELLBUTRIN ; WELLBUTRIN AMFEBIUTAMONE HYDROCHLORIDE ; WELLBUTRIN 9BUPROPION HYDROCHLORIDE ; GENERIC WELLBUTRIN BUPROPION ; BUPROPION 100MG; GENERIC WELLBUTRIN HIVES; WELLBUTRIN SR GENERIC 180MG; BUPROPION SA 100 MG; BUPROPION SR 150MG TEVA PHARMA; WELLBUTRIN BUPROPION HYDROCHLORIDE NOS ; WELLBUTRIN GENERIC 150MG BID PO; BUPROPION 150 MG SR TA WATSON; BUPROPION 150 GENERIC ; BUPROPION 150MG WATSON PHARMACEUTICALS; BUPROPION 150 MG PO Q AM; WELLBUTRIN XL BLUPROPION HYDROCHLORIDE ; BUPROPION WELLBUTRIN R ; WELLUTRIN SR BUPROPION ; BUPROPION SR 150MG TABLET WATSO; WELLBUTRIN SLOW RELEASE BURPOPION HYDROCHLORIDE ; WELLBUTRIN SLOW RELEASE AMFEBUTAMONE HYDROCHLORDE ; WWLLBUTRIN BUPROPION HYDROCHLORIDE ; WEELLBUTRIN BUPROPION HYDROCHLORIDE ; BUPROPION LONG LASTING ; WELLBUTRI BUPROPION HYDROCHLORIDE ; BUPROPION 100MG WATSON PHA; BUPROPION HYDROCHLORIDE WELLBUTRIN SLOW RELEASE ; BUPROPION BURPROPION ; LIBRUIM WELLBUTRIN XL; WELLBUTRIN XL IBUPROPION ; BUPROPION XR 150MG BID; CARBON MONOXIDE BUPROPION LONG ACTING AND OTHER UNSPECIFIED SUBSTANC; BUPROPION 75MG TAB; BUPROPION LONG ACTING METOPROLOL LONG ACTING AND OTHER UNSPECIFIE; BURPOPION BUPROPION ; WELLBUTRIN CONTIN ; WELLBUTRIN 00700501 BUPROPION ; WELLBUTRIN X2 BUPROPION HYDROCHLORIDE ; IBUPROPION HYDROCHLORIDE; ZYNTABAC BUPROPION HYDROCHLORIDE ; WELLBUTRIN IBUPROPION HYROCHLORIDE ; WELLBUTRIN BUPROPION HYDROCHLORIDE 150 MILLIGRAM ; BUPROPION SR 150 MG TEVA; KLONOPIN BUPROPION HYDROCHLORIDE ; WELLBUTRIN 00700501 BUPROPION ; BUPROPION SR TEVA 150 MG TEVA; WELLBUTRIN BUPROPION HYDROCHLORIDE ORAL DRUG; WELLBUTRIN BUPROPIPION HYDROCHLORIDE ; BUPROPION SR 150; WELLBUTRIN SLOW; BUPROPION NGX BUPROPION TABLET; BUPROPION BUPROPION ; WELLBUTRIN SLOW RELEASE IBUPROPION HYDROCHLORIDE ; WELLBUTRIN IBUPROPIN HYDROCHLORIDE ; WELLBUTRIN 00700501 BUPROPION ; WELLBUTRIN 00700501 ; BUPROPIN BUPROPION ; WELLBUTRIN BUPROPION HYDROCHLORIDE 20 MILLIGRAM ; WELLBUTRIN LX; WELLBUTRIN BURPOPION HYDROCHLORIDE ; WELLBUTRIN BUPROPION HYDROCHLORIDE TABLET; WELLBUTRIN BURPROPION HYDROCHLORIDE ; BUPROFEN NGX BUPROPION UNKNOWN; BUPROPION HCL EXTENDED RELEASESR 150 MG EON LABS; BUDEPRION BUPROPION HYDROCHLORIDE ; WELLBURTIN XL BUPROPION ; WELLBUTRIN FR; WELLBUTIN BUPROPION HYDROCHLORIDE ; BUPROPION SR 150MG PENN LABS A GSK COMPANY ; WELLBUTRION BUPROPIONE ; BUPROPION HYDROCHLORIDE WELLBTRIN ; BUPROPION HYDROCHLORIDE NGX BUPROPION TABLET 150 MG; WELLBUTRIN BUPROPIUM HYDROCHLORIDE ; BUPROPION HCL TABLETS EXTENDED RELEASE NGX BUPROPION EXTENDED RELEA; ZYBAN UNK ; WELLBUTRIN BUPRIPION HYDROCHLORIDE ; SELLBUTRIN XL BUPROPION HYDROCHLORIDE ; BUPROPION CON ; WELLBUTRIN BUPRIOPION HYDROCHLORIDE ; WELLBUTRIN BUROPION HYDROCHLORIDE ; WELLBUTRIN XL BUPROPION HYDROCHLORIDE 150 MILLIGRAM ; WELLBURTIN IBUPROPION HYDROCHLORIDE ; BUPROPION BUPRIOPION ; BUPROPION BUPROPION SLOW RELEASE TABLET; BUPROPION 300 MG TEVA; WELLBUTRIN SL; BUPTOPION BUPROPION ; WELLBUTRIN ER BUPROPION HYDROCHLORIDE ; WELLBUTRIN SR BUPROPION HYDROCHLORIDE TABLETS ; BUPROPION SUSTAINED RELEASE ; CYMBALTA 60 MG AND WELLBUTRIN 100 MG ; BUPROPION HYDROCHLORIDE WELLBUTRIN XL ; WELLBUTRIN BUPROPION CON ; WELLBUTRIN AMFEBUTAMONE HYDROHCLORIDE ; BUPROPION HCL 150MG GLAXOSMITHKLINE; BUPROPION BUPROPION SR ; WELLBUTRIN 00700501 IBUPROPION ; WELLBUTRIN SLOW RELEASE BUPROPION HYDROCHLORIDE TABLET; BUPROPION BUPRIOPION ; WELLBUTRIN SLOW RELEASE; BUPROPION WELLBUTRIN 00700501 ; BURPOPION BUPROPION ; BUPROPION SANDOZ NGX BUPROPION UNKNOWN; BUPROPION NGX BUPROPION EXTENDED RELEASE TABLET 300MG; BUPROPION NGX BUPROPION UNKNOWN; WELLBUTRIN XL UBPROPION HYDROCHLORIDE ; BUPROPION NGX BUPROPION UNKNOWN; BUPROPION IMPAX ; WELLBUTRIN SL 00700501 ; BUPROPION SSR; WELLBUTRIN EXTENDED TABS; BUPROPION XL GENERIC FOR WELLBUTRIN ; BUPROPION XL BUPROPIUM ; BUPROPION XL 100; BUPROPION 300 MG IMPAX ; BUPROPION HYRDOCHLORIDE; BUPROPION NGX BUPROPIUM UNKNOWN; BUPROPION 150MG ER W EON LABS BIOSCRIP; WELLBUTRIN XL CON ; WELLBUTRIN BUPROPION HYDROCHLORIDE TABLET; WELLBUTRIN XR GEQ ; WELLBUTRIN BUPPROPION HYDROCHLORIDE ; WELLBUTRIN XL BUPROPION HYDROCHLORIDE EXTENDED RELEASE ; BUPROPION 150MG TEVA; BUPROPION SR 100 MG TABLETS ; WELLBUTRIN XI 150MG GLAXOSMITH; BUPROPION HYDROCHLORIDE SR 200 MG SR EON LABS SANDOZ; BUDEPRION XL BUPROPION HCL 300MG TEVA; WELLBUTRIN FOR DEPRESSION ; BUPROPION 300MG TEVA; ROUND OFF WHITE WPT 3332 BUPROPION XL; BUPROPION HYDORCHLORIDE XL; BUPROPION NGX BUPROPION UNKNOWN; WELLBUTRIN SR BUPROPION HCL SUSTAINED RELEASE 12 HR TAB ; BUPROPION HCL XL 300MG ANCHEN; BUPROPION XL 300MG TEA; BUPROPION OR BUSPIRONE; BUPROPRION BUPROPION HYDROCHLORIDE ; WELLBUTRIN AMFEBUMATONE HYDROCHLORIDE ; BUPROPION SR 150 MILLOGRAMS UNKNOWN; BUPROPION BUPROPION CON ; WELLBUTRIN CON ; BUPROPION 300 MG XL TAB ANCHEN; AMFEBUTAMONE BUPROPION ; BUPROPION XL 150 TEVA; WELLBUTRIN 9AMFEBUTAMONE HYDROCHLORIDE ; BUPROPION HCL 75 MG TEVA USA; BUPROPION SR 200MG WATCON; BUPROPION SR 200MG WATSON; BUPROPION XL 300MG 450MG; BUPROPION SL 150MG; BUPROPION SL; BUPROPION HCL XL 300 MG ANCHEN; BUPROPION 150XL TEVA; WELLBUTRIN SR XR; IC BUPROPION HCL; BUPROPION HCL SR TABS 150MG TEVA; WELLBUTRIN 00700501 BUPROPION TABLET; BUPROPION HCL XL 150 MG TEVA; BUPROPION HCL XL 300 MG TEVA; BUPROPION HCL TABS X1 300MG ANCHEN; BUPROPION XL TEVA BRAND ; BUPROPION SR 150MG TAB EON; BUPROPION HYDROCHLORIDE SR 100 MG TIVO USA; BUPROPION HCL ER NOT SPECIFIED ; BUPROPION HYDROCHLORIDE FORMULATION UNKNOWN BUPROPION HYDROCHLORIDE; BUPROPION HCL SUSTAINED RELEASE 12 HR TAB ; BUPROPION HYDROCHLORIDE XL WATSON LABORATORIES ; BUPROPION HYDROCHLORIDE 75 MG 100 MG TABLETS; BUPROPION HYDROCHLORIDE BUPROPION HYDROCHLORIDE BUPROPION HYDROCHLO; BUPROPION SR 50MG WATSON ; BUPROPION 150MG VA; BUPROPION SR 150MG 1 BID ORALLY; BUPROPION HCL XL TABS 150MG ANCHEN TEVA; BUPROPION XL 150MG N A; BUPROPION 300 MG XL ANCHEN PHARM; WELLBUTRIN NI; WELLBUTRIN SR BUPROPION HCL SUSTAINED RELEASE ; BUPROPION XL BUPROPION ; BUPROPION CR; WELLBUTRIN XL BUPROPION HCL EXTENDED RELEASE ; BUPROPION XL 300 MG WATSON; BUPROPION HCL 150 MG GLOBAL PHARM; BUPROPION XL 300MG TEVA; BUPROPION RL BUPROPION HYDROCHLORIDE ; BUDEPRION SR OTHER GENERIC FORMS OF WELLBUTRIN; EXTENDED RELEASE BUPROPION HYDROCHLORIDE; BUPROPION XL 150MG ACTAVIS; BUPROPION HCL XL TABS 300MG ANCHEN; BUPROPION XL 300MG NDC 00093535156; BUPROPION XL 300MG NDC 00591333230; BUPROPION HCL EXTENDED RELEASE 300 MG WATSON; BUPROPION HCL EXTENDED RELEASE 150 MG GLOBAL; BUPROPION ORAL; WELLBUTRIN XL EXTENDED RELEASE BUPROPION HYDROCHLORIDE ; BUPROPION HYDRATE BUPROPION ; BUPROPION PILL ; WELLBUTRIN XL TABLET EXTENDED RELEASE; WELLBURTIN BUPROPION HYDROCHLORIDE BUPROPON HYDROCHLORIDE ; WELLBUTRIN ALZAZOPRAM; BUPROPION HCL XL 300MG PER TABLET WATSON LABORATORIES; BUPROPION BUPROPION SR WELLBUTRIN; APLENZIN BUPROPION HYDROBROMIDE; BUPROPION HCL BR; ELONTRIL BUPROPION HYDROCHLORIDE TABLET EXTENDED RELEASE; WELLBUTRIN 200 MILLIGRAM ; BUPROPION HYDROCHLORIDE ELONTRIL ; BUPROPION HYDROCHLORIDE SUSTAINED RELEASE BUPROPION HYDROCHLORIDE ; WELLBUTRIN WELLBUTRIN XL; WELLBURTIN 00700501 BUPROPION ; WELLBUTRIN BUPROPION HC1 ; BUPROPIONE BUPROPION BUPROPION ; BUPROPION HCL XL 150 MG 24 HR SUSTAINED RELEASE TEVA ; ELONTRIL BUPROPION HYDROCHLORIDE; VOXRA BUPROPION HYDROCHLORIDE; VOXRA BUPROPION XL; ELONTRIL BUPROPION HYDROCHLORIDE; WELLBUTRIN BUPROPEON SR ; ELONTRIL BUPROPION HYDROCHLORIDE; HYDROXYBUPROPION; BUPROPION BUPROPRION ; BUPROPION HYDROCHLORIDE BUPROPION HYDROCHLORIDE 150 MG; BUPROPION EXTENDED RELEASE UNKNOWN; BUPROPION EXTENDED RELEASE BUPROPION UNKNOWN; BUPROPION EXTENDED RELEASE ; WELLBUTRIN XR BUPROPION ; BUPROPION HCL ER 300 MG NOT SPECIFIED ; BUPROPION HCL ER 150 MG NOT SPECIFIED ; BUPROPION EXTENDED RELEASE BUPROPION ; BUPROPION WELLBUTRIN 75MG; GENERIC WELLBUTRIN TEAVA; BUPROPION HCL X1 150 MG ANCHEN PHARMACE; WELLBUTRIN 05703001 ; ELONTRIL BUPROPION HYDROCHLORIDE EXTENDED RELEASE 150 MG; BRAND NAME WELLBUTRIN XL; ELONTRIL BUPROPION HYDROCHLORIDE EXTENDED RELEASE; WELLBUTRIN SR WELLBUTRIN XL; BUPROPION 300 MGS DO NOT KNOW; BUPROPION HYDROCHLORIDE BUPROPION HYDROCHLORIDE; EA BUPROPION SR; BUPROPION HYDROCHLORIDE WELLBUTRIN XR BUPROPION HYDROCHLORIDE EXTENDE; ELONTRIL ELONTRIL BUPROPION HYDROCHLORIDE EXTENDED RELEASE 150 MG; WELLBUTRIN XL BUPROPIION HYDROCHLORIDE ; VOXRA VOXRA BUPROPION HYDROCHLORIDE NOT SPECIFIED ; ELONTRIL ELONTRIL BUPROPION HYDROCHLORIDE EXTENDED RELEASE NOT S; ELONTRIL ELONTRIL BUPROPION HYDROCHLORIDE NOT SPECI; BUPROPION HYDROCHLORIDE ELONTRIL BUPROPION HYDROCHLORIDE ; BUPROPION BUPROPION UNKNOWN; ELONTRIL BUPROPION HYDROCHLORIDE NOT SPECIFIED ; ELONTRIL ELONTRIL BUPROPION HYDROCHLORIDE NOT SPECIFIED; BUPROPION XC; VOXRA VOXRA BUPROPION HYDROCHLORIDE 150MG 300MG ; WELLBUTRIN XL SR; WELLBUTRIN XL WELLBUTRIN XL BUPROPION HYDROCHLORIDE EXTENDED RELEAC; WELLBUTRIN SR WELLBUTRIN; WELLBUTRIN WELLBUTRIN SR; WELLBUTRIN DESVENLAFAXINE SUCCINATE MONOHYDRATE ; BUPROPION HCL XR24H; BUPROPION 300MG XL ACTAVIS; BUPROPION HCL TABLETS NGX ; ELONTRI ELONTRIL BUPROPION HYDROCHLORIDE EXTENDED RELEASE 150 MG ; BUPROPION HCL INJ 0 3MG ML 1ML BEDFORD LABS INC ; BUPROPION BUPROPION UNKNOWN ; VOXRA VOXRA BUPROPION HYDROCHLORIDE EXTENDED RELEASE NOT SPECIFIE; SUSTAINED RELEASE BUPROPION; WELLBUTRIN SR EQ; ELONTRIL ELONTRIL BUPROPION HYDROCHLORIDE EXTENDED RELEASE NOT SPEC; PROPRANOLOL WELLBUTRIN 00700501 ; BUPROPION ANY ANY; WELLBUTRIN GENERIC 150 MG; BUPROPION SR 150 MYLAN; WELLBUTRIN XL BUPROPION HYDROCHLORIDE TABLETS BUPROPION HYDROCHLORIDE ; BUPROPION BUPROPION 300 MG; BUPROPION 150 MG DON T KNOW; BUPROPION SR GENERIC FOR WELLBUTRIN SR 150MG TABLETS UNSURE; CAFERGOT TABLET ZYBAN CAFERGOT ; BUPROPION SR 100MG TEVA USA; BUPROPION XL 150 MG ACTAVIS; BUPROPION ER TABLET; BUPROPION 300MG XL MYLAN; WELLBUTRIN RETARD; BUPROPION HCL ER BUPROPION HYDROCHLORIDE EXTENDED RELEASE NOT SPECI; ELONTRIL ELONTRIL BUPROPION HYDROCHLORIDE EXTENDED RELEASE 150 MG ; BUPROPION GENERIC FOR WELLBUTRIN GLAX; BUPROPION XL 300MG ACTAVIS; BUPROPION HCL 150 MG WELLBUTRIN ; BUPROPION HYDROCHLORIDE WELBUTRIN XR BUPROPION HYDROCHLORIDE ; BUPROPION HCL XL 150MG ACTIVIS SOUTH; BUPROPION SR 150MG 12 TAB SANDOZ; WELLBUTRIN XL WELLBUTRIN SR; WELLBUTRIN TAB 150MG SA; BUPROPION SR 150 MG TAB SANDOZ; ELONTRIL ELONTRIL BUPROPION HYDROCHLORIDE EXTENDED RELEASE 150 MG N; ELONTRIL ELONTRIL BUPROPION HYDROCHLORIDE EXTENDED RELEASE TABLET N; BUPROPION SUSTAINED RELEASE 300 MG; BUPROPION 200MGS MYLAN; BUPROPION XL 350 MG; BUPROPION ; BUPROPION HCL ER NOT SPECIFIED DF ORAL ; BUPROPION HYDROCHLORIDE UNSPECIFIED TABLET BUPROPION HYDROCHLORIDE ; ZYBAN BUPROPION HYDROCHLORIDE UNSPECIFIED; VOXRA VOXRA BUPROPION HYDROCHLORIDE NOT SPECIFIED ; AMFEBUTAMONE AMFEBUTAMONE BUPROPION HYDROCHLORIDE 150 MG; BUPROPION XL 300 MG TEVA; BUPROPION XL 300MG WATSON; BUPROPION EXTENDED RELEASE 300MG WATSON; BUPROPION EXTENDED RELEASE 150 MG WATSON; BUPROPION 150 MG SR; BUPROPION XL 150 MG LEMMON; BUPROPION XL 300MG 1 ADAY ORAL; BUPROPION 100MG UDL; BUPROPION 300MG CVS CAREMARK; BUPROPION ER BUPROPION EXTENDED RELEASE ; BUPROPION 100MG WELBUTRIN XL; WELLBUTRIN WELLBUTRIN SR; BUPROPION SR 200 MG; ELONTRIL 150 BUPROPION ; BUPROPION SR 150 MG EON LABS; BUPROPION 150 MG Q24H; WELLBUTRIN 00700502 ; NOVO BUPROPION SR; VOXRA VOXRA BUPROPION HYDROCHLORIDE 300 MG NOT SPECIFIED ; VOXRA VOXRA BUPROPION HYDROCHLORIDE EXTENDED RELEASE NOT SPECIFIED; WELLBUTURIN BUPROPION XL; BUPROPION ER 150; ZYNTABAC ZYNTABAC BUPROPION HYDROCHLORIDE NOT SPECIFIED ; WELBUTRIN XL WELLBUTRIN XL ; WELLBUTRIN XL BUPROPION EXTENDED RELEASE ; ELONTRIL ELONTRIL BUPROPION HYDROCHLORIDE NOT SPECIFIED ; BUPROPION 12 SR TAB 150MG MYLAN; BUPROPION NO PREF NAME ; WELLBUTRIN IBUPROFEN ; ELONTRIL ELONTRIL BUPROPION HYDROCHLORIDE 300 MG NOT SPECIFIED ; WELLBUTRIN 007005032 BUPROPION HYDROCHLORIDE ; WELLBUTRIN XL BUPROPION SR; BUPROPION BUPROPION BUPROPION HYDROCHLORIDE ; WELLBUTRIN BUPROPION XL ; BUPROPION HYDROCHLORIDE EXTENDED RELEASE TABLETS XL ASALLC; ZOPLICONE WELLBUTRIN FLUOXETINE VALACYCLOVIR; WELLBUTRIN XL BUPROPION HYDROCHLORIDE TABLET BUPROPION HYDROCHLOR; WELLBUTRIN XL BUPROPIN HYDROCHLORIDE ; WELLBUTRIN BUPROPION HYDROCHLORIDE TABLETS BUPROPION HYDROCHLORIDE ; WELLBUTRIN XL BYPROPION ; BUPROPION BUPROPION 150 MILLIGRAM TABLETS BUPROPION ; BUPROPION HCL XL BUPROPION HYDROCHLORIDE BUPROPION HYDROCHLORIDE ; BUPROPION HYDROCHLORIDE TABLET EXTENDED RELEASE BUPROPION HYDROCHLORI; BUPROPRION GENERIC WELLBUTRIN ; WELLBUTRIN SR BUPROPION HYDROCHLORIDE BUPROPION HYDROCHLORIDE ; BUPROBAN BUPROPION HYDROCHLORIDE ; BUPROPION HCL XL WELLBUTRIN XL; BUPROPION PBUPROPION ; BUPROPION HCL TABLETS ; APLENZIN BUPROPION HYDROCHLORIDE ; WELLBUTRIN XL BUPROPION HYDROCHLORIDE UNKNOWN ; WELLBUTRIN BUPROPION HYDROCHLORIDE BUPROPION HYDROCHLORIDE ; BUPROPION BUPROPION UNKNOWN ; WELLBUTRIN XL TAB; BUPROPION HCL BUPROPION ; BUPROPION HCL XL WELLBUTRIN; WELLBUTRIN BUPROPION HYDROCHLORIDE UNKNOWN ; WELBUTRIN SR WELLBUTRIN ; WELLBUTRIN BUPROPION HYDROCHLORIDE SLOW RELEASE TABLET; WELLBUTRIN BUPROPION; BUPROPION BUPROPI0N ; BUPROPION BUPROPION BUPROPION ; BUPROPION HCL XL 300 MG TABLET ANCHEN PHARMACUTICALS; WELLBUTRIN TABLETS; VARENICLINE BUPROPION NICOTINE PLACEBO; WELLBUTRIN SR BUPROPION TABLET; WELLBUTRINI BUPROPION HYDROCHLORIDE ; BUPROPION 300MG 150MG ANCHEN; WELLBUTRIN GENERIC SR; BUPROPION BUPROPION ; BUPROPION HCL EXTENDED RELEASE 150 MG MYLAN PHARMACEUTICALS INC ; BUDEPRION XL BUPROPION HYDROCHLORIDE EXTENDED RELEASE TABLET 150 MG TEVA; BUPROPION XL300 WATSON; BLINDED BUPROPION HCL; GENERIC BUPROPION SR; BUPROPION HYDROCHLORIDE BUPROPION HYDROCHLORIDE BUPROPION HYDROCHLORIDE ; BUPROPIONE HLX; WELLBUTRIN SR BUPROPRION ; WELLBUTRIN XR BUPROPION HYDROCHLORIDE; BUPROPION HYDROCHLORIDE TABLETS ; WELLBUTRIN HYDROCHLORIDE; BUPROPION SR 150 MG WATSON; WELLBUTRIN 00700501 ; BUPROPION HYDROCHLORIDE BUPROPION HYDROCHLORIDE 150 MG; ELONTRIL ELONTRIL BUPROPION HYDROCHLORIDE NOT SPECIFIED ; GENERIC FORM OF WELLBUTRIN; WELLBUTRIN NON ABBOTT ; COMPOUNDED FORMULATION BUPROPION HYDROCHLORIDE ; WELLBUTRIN BUPROPION HYDROCHLORIDE ; WELLBUTRIN BUPROPION HCL ; BUPROPION HYDROCHLORDIE; BUPROPION 150MG XL GENERIC; BUPROPION HCL SR 200 MG EON LABS; BUPROPION EXTENDED RELEASE BUPROPION HYDROCHLORIDE BUPROPION HYDROCHLORIDE ; BUPROPION EXTENDED RELEASE BUPROPION HYDROCHLORIDE ; BUPROPION BUPROPION BUPROPION ; WELLBUTRIN 100; WELLBUTRIN BUPROPION HYDROCHLORIDE TABLETS BUPROPION HYDROCHLORIDE ; WELLBUTRIN SR BUPROPION HYDROCHLORIDE TABLETS BUPROPION HYDROCHLORIDE ; BUPROPION HYDROCHLORIDE TABLET CONTROLLED RELEASE GENERIC BUPROPION HYDROCHLORIDE ; ZYBAN BUPROPION HYDROCHLORIDE ; ZYBAN BUPROPION HYDROCHLORIDE BUPROPION HYDROCHLORIDE ; BUPROPION HYDROCHLORIDE BUPROPION HYDROCHLORIDE CONTROLLED RELEASE BUPROPION HYDROCHLORIDE ; WELLIBUTRIN XL BUPROPION HYDROCHLORIDE ; BUPROPION HYDROCHLORIDE TABLET CONTROLLED RELEASE GENERIC BUPROPION HYDROCHLORIDE ; WELLBUTRIN BUPROPION HYDROCHLORIDE BUPROPION HYDROCHLORIDE ; BUPROPION XL 300MG 24HR ER TAB; WELLBUTRIN XR BUPROPION HYDROCHLORIDE BUPROPION HYDROCHLORIDE ; WELLBUTRIN BUPROPION BUPROPION ; WELLBUTRIN BUPROPIN HYDROCHLORIDE BUPROPIN HYDROCHLORIDE ; WELLBUTRIN BUPRPION HYDROCHLORIDE ; WELLBURTIN BUPROPION HYDROCHLORIDE BUPROPION HYDROCHLORIDE ; BUPROPION HYDROCHLORID; APLENZIN BUPROPION HYDROBROMIDE ; WELLBUTRIN 00700502 BUPROPION HYDROCHLORIDE ; BUPROPION HYDROCHLORIDE 150MG; WELLBUTRIN XL NOT SPECIFIED ; BUPROPION HYDROCHLORIDE 450MG; WELLBUTRIN SR BUPROPION TABLET 100MG; BUPROPION HYDOCHLORIDE BUPROPION HYDROCHLORIDE ; BUPROPION BUPROPION TABLET 150MG; WELLBUTRIN BUPROPION HYDROCHLORIDE TABLET 75MG; WELLBUTRIN BUPROPION HYDROCHLORIDE ; BUPROPION IBUPROPION BUPROPION ; WELLBUTRIN ; BUPROPION XL BUPROPION UNKNOWN ; WELLBUTRIN BUPROP; WELLBUTRIN XL BUPROPION HYDROCLORIDE ; WELLBUTRIN BUPROPION HYDROCHLORIDE TABLET 100MG; WELLBUTRIN TABLETS BUPROPION HYDROCHLORIDE TABLET 100 MG; WELLBUTRIN XL 150MG; BUPROPION HCL BUPROPION HYDROCHLORIDE ; BUPROPION HCL UNKNOWN ; WELLBUTRIN XL 300 MG; BUPROPION HCL SR TABLETS; BUPROPION HYDROCHLORIDE EXTENDED RELEASE TABLETS USP SR 200MG; WELLBURTIN FORMULATION UNKNOWN BUPROPION HYDROCHLORIDE ; WELLBUTRIN XL 150MG WELLBUTRIN 75MG; WELLBUTRIN XL 15MG; BUPROPION SR 12HR; WELLBBUTRIN BUPROPION HYDROCHLORIDE 450 MILLIGRAM BUPROPION HYDROCHLORIDE ; BUPROPION SR BUPROPIO ; BUPROPION HYDROCHLORIDE BUPROPION HYDROCHLORIDE ; BUPROPION BUPROPION EXTENDED RELEASE TABLET; WELLBUTRIN BUPROPION HYDROCHLORIDE BUPROPION HYDOCHLORIDE ; WELLBITRIN BUPROPION HYDROCHLORIDE BUPROPION HYDROCHLORIDE ; BUPROPION BRUPROPION BUPROPION ; WELLBUTRIN SR BUPROPION HYDROCHLORIDE TABLET; BUPROPION XL BUPROPION HYDROCHLORIDE UNKNOWN ; WELLBUTRIN BUPROPION HYDROCHLORDE UNKNOWN ; EUPROPION BUPROPION UNKNOWN ; WELLBUTRIN BUPROPION HYDROCHLORIDE TABLET 100 MG; BUPROPION HYDROCHLORIDE BUPROPION HYDROCHLORIDE ; WELLBUTRIN X BUPROPION HYDROCHLORIDE ; WELLBUTRIN BUPROPION HYDROCHLORIDE BUPROPION ; WELLBUTRIN BUPROPION HYDROCHLORIDE TABLET 75 MG ; WELLBUTRIN XL BOPROPION HYDROCHLORIDE ; WELLBUTRIN XL BUPROPIONYDROCHLORIDE ; BUPROPION BUPROPION SUSTAINED ACTION BUPROPION ; WELLBUTRIN BUPROPION HCL BUPROPION HYDROCHLORIDE ; BUPROPION HCL XL 300MG ACTAVIS; IBUPROPION BUPROPION ; WELLBUTRIN XL BUPROPION HYDROCHLORIDE ; BUPROPION HCL ER XL 150MG; WELLBUTRIN XL; IC BUPROPION HCL XL; WELLBUTRIN SR; ZYBAN SR; BUPROPION HYDROCHLORIDE BUPROPION HYDROCHLORIDE TABLET BUPROPION HYDROCHLORIDE ; BUPROPION BUPROPION HYDORCHLORIDE ; WELLBUTRIN BUPROPION ; WELLBUTRIN ER BUPROPION ; WELLBUTRIN BUPROPION UNKNOWN ; WELBUTRIN BUPROPION ; WELLBUTRIN SR BUPROPION BUPROPION ; WELLBUTRIN 150 MG COMPRESSE A RILASCIO MODIFICATO; BUPROPION HCL BUPROPION HYDROCHLORIDE ; WELLBUTRIN NOT PROVIDED GLAXOSMITHKLINE; WELLBUTRIN BUPROPION ; BUPROPION HYDROCHLORIDE GENERIC BUPROPION HYDROCHLORIDE ; BUPROPION HYDROCHLORIDE TABLET EXTENDED RELEASE; BUPROPION HYDROCHLORIDE BUPROPION HYDROCHLORIDE; BUPROPION HYDROCHLORIDE UNSPECIFIED TABLET GENERIC PUPROPION HYDROCHLORIDE ; WELLBUTRIN BUPROPION HYDROCHLORIDE TABLET 75 MG; WELLBUTRIN 150 MG HS; WELLBUTRIN XL 150 MG; BUPROPION XL BUPROPION HYDROCHLORIDE 150 MILLIGRAM TABLETS ; BUPROPION HCL BUPROPION HYDROCHLORIDE SUSTAINED RELEASE TABLET ; BUPROPION HCL SR BUPROPION HYDROCHLORIDE ; WELLBUTRIN 150 XR; SDZ BUPROPION; GENERIC BUPROPION XL; BUPROPION 300 MG ER WELLBUTRIN ; GENERIC WELLBUTRIN EX; WELLBUTRIN XL BUPROPION BUPROPION.

**drug name: varenicline**

CHANTIX; VARENICLINE TARTRATE; CHAMPIX; VARENICLINE; CHANTIX 2MG PFIZER; CHANTIX VARENICLINE TARTRATE ; VARENICLINE TARTRATE VARENICLINE TARTRATE ; CHANTIX 1MG PFIZER; CHAMPIX VARENICLINE TARTRATE ; CHANTIX 0 5 MG PFIZER; CHANTIX 1 MG PHIZER; CHANTIX VARENICLINE TARTRATE UNKNOWN ; VARENICLINE PLACEBO CODE NOT BROKEN ; CHAMPIX VARENICLINE ; CHANTIX VARENICINE TARTRATE ; CHAMPIX 1MG; CHANTIX 05703001 ; VARENICLINE 1MG PFIZER; VARENICLINE VARENICLINE TARTRATE; VARENICLINE 0 5MG QD D1 3 BID D 4 7 1 0MG BID D 8 84 PFIZER; VARENICLINE OR MATCHED PLACEBO 1 0MG PFIZER; CHANTIX CONTINUING MONTH PAK; VARENICLINE TARTRATE PLACEBO; CHAMP X; CHAMPIX PFIZER; CHAMPIX FILM COATED TABLET; CHAMPIX 0 5MG; VARENICLINE 1 MG; CHAMPIX ACTIVE INGR VARENICLINE ; WELLBUTRIN CHANTIX; CHANTIX PAK; CHANTIX CONTINUING; CHANTIX STARTING MONTH PAK; CHANTIX PILL; VARENICLINE 05703002 ; CHANTIX 0 5 1 0 MG; CHAMPIXCHAMPIX TABLET FILMOMHULD 1MGVARENICLINE TABLET 1MG; VARENICLINE CHAMPIX TABLET ; TYRVAYA; CHANTIX 1 MG BID; VARENICLINE VARENICLINE 1MG TAB 56 ; VARENICLINE VARENICLINE TARTRATE ; VARENICLINE VARENICLINE TAB STARTER PACK 53 ; VARENICLINE VARENICLINE 1MG TAB ; PFIZER CHAMPIX; VARENICLINE 1 0MG; ASPIR LOW CHANTIX; VARENICLINE VARENICLINE TAB STARTING MONTH PACK 53 ; CHANTIX FILM COATED TABLET; VARENICLINE VARENICLINE TARTRATE 1MG TAB ; VARENICLINE 05703002 ; CHANTIX1 MG BID; CHAMPIX TABLET; VARENICLINE 0 5MG; CHANTIX 1MG BID; STOBACCO; VARENICILINE; APO VARENICLINE; CHANTIX TAB; VARENICLINE 1MG; VARENICLINE SALICYLATE; GENERIC CHANTIX; VARENICLINE TAB; VARENICLINE CHAMPIXTABLET ; VARENICLINE APO 0 5MG TABLETS; TYRVAYA 0 03MG NASAL SPRAY; CHANTIX VARENICLINE ; CHANTIX VARENICLINE ; CHANTIX VARENICLINE ; VARENICLINE TABLETS VARENICLINE ; VARENICLINE VARENICLINE ; VARENICLINE TARTRATE VARENICLINE ; VARENICLINE 1MG CHANTIX; VARENICLINE 1 MG PFIZER; CHANTIX NICOTINE ANTAGONIST ; VARENICLINE 0 5 MG PFIZER; VARENICLINE TABLETS; VARENICLINE PFIZER; VARENICLINE CHANTIX 1 MG TABLETS PFIZER INC ; VARENICLINE TARTRATE 0 5MG PFIZER; CHANTIX ANTI SMOKING AGENTS ; CHANTIX PACK; VARENICLINE TARTRATE 1MG PFIZER; CHANTIX ALL OTHER THERAPEUTIC PRODUCTS TABLET; VARENICLINE TARTRATE VARENICLINE TARTRATE ; VARENICLINE CHANTIX PFIZER ; CHAMPIX NO PREF NAME ; PFIZER CHAMPIX VARENICLINE TARTARATE ; PFIZER CHAMPIX VARENICLINE TARTRATE ; VARENICLINE TARTRATE 5MG PFIZER; VARENICLINE TARTRATE 1MG PFIZER; VARENICLINE TARTRATE 5MG PFIZER; VARENICLINE TARTRATE 5 MG PFIZER; VARENICLINE TERTRATE PFIZER; VARENICLINE 1 MG PFIZER; CHAMPIX 05703001 VARENICLINE ; VARENICLINE 1MG BID UNK; VARENICLINE 1MG TABLETS; VARENICLINE 1MG PFIZER; VARENICLINE TARTRATE AS PART OF STUDY ; VARENICLINE TARTRATE PRESCRIBED BY OWN MD ; PFIZER CHANTIX; VARENICLINE TARTRATE 1MG PHIZER; VARENICLINE 1MG TABLETS PFIZER; VARENICLINE STARTER PACK; CHANTRIX VARENICLINE ; VARENICLINE 1 MG PFIZER; VARENICLINE TARTRATE CHAMPIX ; VARENICLINE 1MG VAMC; VARENICLINE 1MG TABLET; VARENICLINE PFIZER; CHAMPIX 05703001 VARENICLINE ; VARENICLINE 1MG PFIZER LABS; VARENICLINE 0 5MG PFIZER; VARENICLINE STARTER PACK; CHANTIX VARENICLING 1 MG PFIZER LABS; VARENICLINE 1MG PFIZER; CHAMPIX VARENICLINE TARTRATE ; VARENICLINE 1 MG PFIZER; CHAMPIX VARENICLINE TARTRATE VARENICLINE TARTRATE ; VARENICLINE STARTER PACK ; VARENICLINE 1MG; VARENICLINE CHAMPLIX VARENICLINE ; VARENICLINE 0 5 PFIZER; VARENICLINE 1 PFIZER; VARENICLINE STARTING MONTH PACK 0 5 AND 1 MG PFIZER; VARENICLINE 0 5 1MG PFIZER; BLINDED VARENICLINE CP 526 555 ; VARENICLINE 1 0MG PFIZER; CHAMPIX TABLETS ; VARENICLINE THERAPY PFIZER INC ; VARENICLINE STARTING MONTH PAK; BLINDED VARENICLINE TARTRATE; VARENICLINE 1 MG TABLETS PFIZER; VARENICLINE 0 5MG PFIZER; VARENICLINE 0 5MG 1MG PFIZER; CHANTIX 05703001 ; VARENICLINE 0 5 1MG KIT PFIZER; CHANTIX DOSE PACK VARENICLINE ; CHAMPIX VARENICLINE 0 ; CHAMPIX 05703001 ; CHAMPIX 05703001 ; VARENICLINE ONE MG PFIZER; CHAMPIX 05703002 CHAMPIX VARENICLINE TARTRATE NOT SPECIFIED ; VARENICLINE TARTRATE 1 MG ; CHAMPIX 1 MG ; CHANTIX 1MG TABLET PFL PHIZER US PHARM; VARENICLINE 0 5MG TABS; VARENICLINE CHANTIX PFIZER ; CHAMPIX ; CHAMPIX 0 5 MG ; CHAMPIX VARIENCLINE TARTRATE ; VARENICLINE VARENICLINE UNKNOWN; CHANTIX TABLETS; CHANTIX VARENCLINE TARTRATE FILM COATED TABLET; VARENICLINE CON ; CHAMPIX NOS; CHANTIX VARENICLINE ; VARENICLINE OR PLACEBO; CHANTIX VARENICLINE TARTERATE ; CHANTIX 1 MG UNKNOWN; VARENICLINE BUPROPION NICOTINE PLACEBO; CHANTIX PFIZER; CHANTIX 0 5MG; CHANTIX UNKNOWN ; VARENICLINE TARTRATE VARENICLINE TARTRATE TABLETS VARENICLINE TARTRATE ; CHANTIX VARENICLINE ; CHANTIX VARENICILLINE TARTRATE ; VARENICLINE OR MATCHED PLACEBO 0 5MG AND 1 0MG PFIZER; VARENICLINE CHANTIX ; CHANTIX VARENICLINE TARTRATE VARENICLINE TARTRATE ; CHANTIX 0 5MG 1MG PFIZER; VARENICLINE VARENCICLINE ; VARENICLINE TARTARATE.

**e-Supplementary material 2: The specific formulas for the four measures**

1. ROR formula

positive safety signal was defined as 95% confidence interval (CI) lower limit >1, with a ≥3

b) PRR formula

positive safety signal was defined as 95% CI lower limit >1, with a ≥3

1. BCPNN formula

*α=β=2, α1=β1=γ11=1*

positive safety signal was defined as IC025 (lower limit of 95% CI) >0

d) EBGM formula

positive safety signal was defined as EBGM05 (lower limit of 95% CI) >2.

For the above formulas, acquiring values for variables a, b, c, and d was indispensable. Variable “a” stood for those experiencing desired AEs post target drug, “b” represented individuals with non-target AEs post target drug, “c” denoted individuals experiencing the target AE without target drug, and “d” stood for those with non-target AEs without target drug. The total count N was the sum of a, b, c, and d (N=a+b+c+d).

| Drugs | Target adverse reaction | Other adverse reaction | Total |
| --- | --- | --- | --- |
| drugA+drugB | a | b | a+b |
| drugA | c | d | c+d |
| Total | a+c | b+d | a+b+c+d |
|  |  |  |  |
| Drugs | a | b | a+b |
| drugA+drugB | c | d | c+d |
| drugB | a+c | b+d | a+b+c+d |
| Total | a | b | a+b |

**e-Table 1: Schematic table of drug combination analysis.**

**e-Table 2: Characteristics of reports associated with bupropion, nicotine and varenicline in combination from 2004Q1–2024Q2. Healthcare professionals including reporters such as physicians and pharmacists; nonhealthcare professionals including reporters such as consumer and lawyer.**

|  | Bupropion and nicotine (N=9) | Bupropion and varenicline (N=21) | Nicotine and varenicline (N=15) |
| --- | --- | --- | --- |
| Sex |  |  |  |
| Female | 7 (77.8%) | 17 (81.0%) | 11 (73.3%) |
| Male | 2 (22.2%) | 4 (19.0%) | 4 (26.7%) |
| Missing | 0 | 0 | 0 |
| Weight (kg) |  |  |  |
| <50 | 0 | 2 (9.5%) | 0 |
| >100 | 3 (33.3%) | 1 (4.8%) | 0 |
| 50-100 | 4 (44.4%) | 12 (57.1%) | 9 (60.0%) |
| Missing | 2 (22.2%) | 6 (28.6%) | 6 (40.0%) |
| Age (year) |  |  |  |
| >85 | 0 | 0 | 0 |
| 18-64.9 | 3 (33.3%) | 11 (52.4%) | 5 (33.3%) |
| 65-85 | 3 (33.3%) | 5 (23.8%) | 4 (26.7%) |
| Missing | 3 (33.3%) | 5 (23.8%) | 6 (40.0%) |
| Reporter |  |  |  |
| Healthcare professional | 1 (11.1%) | 6 (28.6%) | 6 (40.0%) |
| Nonhealthcare professional | 8 (88.9%) | 13 (61.9%) | 9 (60.0%) |
| Missing | 0 | 2 (9.5%) | 0 |

**e-Table 3: Bupropion, nicotine and varenicline Adverse Drug Reactions (ADRs) instructions.**

| Bupropion | | nicotine | | varenicline | |
| --- | --- | --- | --- | --- | --- |
| ADVERSE REACTION | PT | ADVERSE REACTION | PT | ADVERSE REACTION | PT |
| Suicidal thoughts | Suicidal ideation | Headache | Headache | Nausea | Nausea |
| Suicidal behaviors | Suicidal behaviour | Sleep disorder | Sleep disorder | Abdominal pain | Abdominal pain |
| Seizure | Seizure | Syncope | Syncope | Flatulence | Flatulence |
| Increased blood pressure and hypertension | Blood pressure increased | Dizziness | Dizziness | Dyspepsia | Dyspepsia |
| Hypertension | Hypertension | Withdrawal syndrome | Withdrawal syndrome | Vomiting | Vomiting |
| Mania | Mania | Drug dependence | Drug dependence | Constipation | Constipation |
| Hypomania | Hypomania | Myalgia | Myalgia | Gastrooesophageal reflux disease | Gastrooesophageal reflux disease |
| Psychosis and other neuropsychiatric reactions | Psychotic disorder | Dyspepsia | Dyspepsia | Dry mouth | Dry mouth |
| Angle-closure glaucoma | Angle closure glaucoma | Diarrhea | Diarrhoea | Insomnia | Insomnia |
| Dizziness | Dizziness | Hiccup | Hiccups | Abnormal dreams | Abnormal dreams |
| Serotonin syndrome | Serotonin syndrome | Chest discomfort | Chest discomfort | Sleep disorder | Sleep disorder |
| Nausea | Nausea | Bronchitis | Bronchitis | Nightmare | Nightmare |
| Headache | Headache | Hypertension | Hypertension | Headache | Headache |
| Diarrhea | Diarrhoea | Influenza-like symptoms | Influenza like illness | Dysgeusia | Dysgeusia |
| Somnolence | Somnolence | Pain | Pain | Somnolence | Somnolence |
| Dry mouth | Dry mouth | Back pain | Back pain | Lethargy | Lethargy |
| Sexual dysfunctiona | Sexual dysfunction | Paraesthesia | Paraesthesia | Rhinorrhoea | Rhinorrhoea |
| Hyperhidrosis | Hyperhidrosis | Flatulence | Flatulence | Dyspnoea | Dyspnoea |
| Anxiety | Anxiety | Fever | Pyrexia | Upper respiratory tract disorder | Upper respiratory tract disorder |
| Constipation | Constipation | Coughing | Cough | Rash | Rash |
| Decreased appetite | Decreased appetite | Rhinitis | Rhinitis | Pruritus | Pruritus |
| Insomnia | Insomnia | Tooth disorder | Tooth disorder | Increased appetite | Increased appetite |
| Arthralgia | Arthralgia | Sinusitis | Sinusitis | Anorexia | Anorexia |
| Fatigueb | Fatigue | Stomatitis | Stomatitis | Anaemia | Anaemia |
| Paraesthesiac | Paraesthesia | Throat irritation | Throat irritation | Lymphadenopathy | Lymphadenopathy |
| Vision blurred | Vision blurred | Chest tightness | Chest discomfort | Leukocytosis | Leukocytosis |
| Vomiting | Vomiting | Constipation | Constipation | Splenomegaly | Splenomegaly |
| Hot flush | Hot flush | Anxiety | Anxiety | Thrombocytopenia | Thrombocytopenia |
| Tremor | Tremor | Irritability | Irritability | Angina pectoris | Angina pectoris |
| Upper abdominal pain | Abdominal pain upper | Restlessness | Restlessness | Myocardial infarction | Myocardial infarction |
| Viral gastroenteritis | Gastroenteritis viral | Impaired concentration | Disturbance in attention | Palpitations | Palpitations |
| Influenza | Influenza | Weight increased | Weight increased | Tachycardia | Tachycardia |
| Tinnitus | Tinnitus | Emotional lability | Affect lability | Acute coronary syndrome | Acute coronary syndrome |
| Urinary tract infection | Urinary tract infection | Somnolence | Somnolence | Arrhythmia | Arrhythmia |
| Abdominal pain | Abdominal pain | Fatigue | Fatigue | Atrial fibrillation | Atrial fibrillation |
| Irritability | Irritability | Insomnia | Insomnia | Bradycardia | Bradycardia |
| Dysgeusia | Dysgeusia | Confusion | Confusion | Cardiac flutter | Cardiac flutter |
| Rash | Rash | Depression | Depression | Cor pulmonale | Cor pulmonale |
| Muscle strain | Muscle strain | Apathy | Apathy | Coronary artery disease | Coronary artery disease |
| Palpitations | Palpitations | Tremor | Tremor | Ventricular extrasystoles | Ventricular extrasystoles |
| Tachycardia | Tachycardia | Increased appetite | Increased appetite | Tinnitus | Tinnitus |
| Myocardial infarction | Myocardial infarction | Incoordination | Coordination abnormal | Vertigo | Vertigo |
| Vertigo | Vertigo | Runny nose | Rhinorrhoea | Deafness | Deafness |
| Motion sickness | Motion sickness | Watering eyes | Lacrimation increased | Meniere's disease | Meniere's disease |
| Lower abdominal pain | Abdominal pain lower | Sneezing | Sneezing | Thyroid gland disorders | Thyroid disorder |
| Eructation | Eructation | Nasal discomfort | Nasal discomfort | Conjunctivitis | Conjunctivitis |
| Lip swelling | Lip swelling | Dyspnoea | Dyspnoea | Eye irritation | Eye irritation |
| Hematochezia | Haematochezia | Nausea | Nausea | Eye pain | Eye pain |
| Hernia | Hernia | Arthralgia | Arthralgia | Vision blurred | Vision blurred |
| Feeling jittery | Feeling jittery | Menstrual disorder | Menstrual disorder | Visual impairment | Visual impairment |
| Feeling abnormal | Feeling abnormal | Palpitations | Palpitations | Blindness transient | Blindness transient |
| Asthenia | Asthenia | Abdominal pain | Abdominal pain | Cataract subcapsular | Cataract subcapsular |
| Thirst | Thirst | Confusion | Confusional state | Dry eye | Dry eye |
| Feeling hot | Feeling hot | Acne | Acne | Night blindness | Night blindness |
| Cholecystitis | Cholecystitis | Dysmenorrhea | Dysmenorrhoea | Ocular vascular disorder | Ocular vascular disorder |
| Pneumonia | Pneumonia | Pruritus | Pruritus | Photophobia | Photophobia |
| Staphylococcal infection | Staphylococcal infection | Oedema peripheral | Oedema peripheral | Vitreous floaters | Vitreous floaters |
| Kidney infection | Kidney infection | Allergy | Hypersensitivity | Diarrhoea | Diarrhoea |
| Increased blood creatinine | Blood creatinine increased | Dry mouth | Dry mouth | Toothache | Toothache |
| Increased hepatic enzymes | Hepatic enzyme increased | Hiccups | Hiccups | Dysphagia | Dysphagia |
| Decreased hematocrit | Haematocrit decreased | Aphasia | Aphasia | Eructation | Eructation |
| Dehydration | Dehydration | Amnesia | Amnesia | Gastritis | Gastritis |
| Intervertebral disc protrusion | Intervertebral disc protrusion | Migraine | Migraine | Gastrointestinal haemorrhage | Gastrointestinal haemorrhage |
| Jaw pain | Pain in jaw | Bronchospasm | Bronchospasm | Mouth ulceration | Mouth ulceration |
| Disturbance in attention | Disturbance in attention | Sputum increased | Sputum increased | Enterocolitis | Enterocolitis |
| Lethargy | Lethargy | Rash | Rash | Esophagitis | Oesophagitis |
| Intention tremor | Intention tremor | Purpura | Purpura | Gastric ulcer | Gastric ulcer |
| Balance disorder | Balance disorder | Vision abnormal | Visual impairment | Intestinal obstruction | Intestinal obstruction |
| Memory impairment | Memory impairment | Nasal congestion | Nasal congestion | Pancreatitis acute | Pancreatitis acute |
| Amnesia | Amnesia | Eye irritation | Eye irritation | Chest pain | Chest pain |
| Mental impairment | Mental impairment | Pharyngitis | Pharyngitis | Chest discomfort | Chest discomfort |
| Presyncope | Presyncope | Hypoaesthesia | Hypoaesthesia | Chills | Chills |
| Abnormal dreams | Abnormal dreams | Earache | Ear pain | Edema | Oedema |
| Nervousness | Nervousness | Facial flushing | Flushing | Influenza-like illness | Influenza like illness |
| Dissociation (feeling spacey) | Dissociation | Hoarseness | Dysphonia | Pyrexia | Pyrexia |
| Tension | Tension | Nasal ulcer | Nasal ulcer | Gall bladder disorder | Gallbladder disorder |
| Agitation | Agitation | Nasal mucosal blistering | Nasal mucosal blistering | Liver function test abnormal | Liver function test abnormal |
| Mood swings | Mood swings |  |  | Weight increased | Weight increased |
| Micturition urgency | Micturition urgency |  |  | Electrocardiogram abnormal | Electrocardiogram abnormal |
| Vaginal hemorrhage | Vaginal haemorrhage |  |  | Muscle enzyme increased | Muscle enzyme increased |
| Irregular menstruation | Menstruation irregular |  |  | Urine analysis abnormal | Urine analysis abnormal |
| Erectile dysfunction | Erectile dysfunction |  |  | Diabetes mellitus | Diabetes mellitus |
| Vulvovaginal dryness | Vulvovaginal dryness |  |  | Hypoglycaemia | Hypoglycaemia |
| Alopecia | Alopecia |  |  | Hyperlipidaemia | Hyperlipidaemia |
| Hypotension | Hypotension |  |  | Hypokalaemia | Hypokalaemia |
| Syncope | Syncope |  |  | Arthralgia | Arthralgia |
| Pruritus | Pruritus |  |  | Back pain | Back pain |
| Appetite increase | Increased appetite |  |  | Myalgia | Myalgia |
| Dyspepsia | Dyspepsia |  |  | Arthritis | Arthritis |
| Urinary frequency | Pollakiuria |  |  | Muscle cramp | Muscle spasms |
| Arthritis | Arthritis |  |  | Musculoskeletal pain | Musculoskeletal pain |
| Akathisia | Akathisia |  |  | Myositis | Myositis |
| Migraine | Migraine |  |  | Osteoporosis | Osteoporosis |
| Impaired sleep quality | Poor quality sleep |  |  | Disturbance in attention | Disturbance in attention |
| Sedation | Sedation |  |  | Dizziness | Dizziness |
| Sensory disturbance | Sensory disturbance |  |  | Amnesia | Amnesia |
| Confusion | Confusional state |  |  | Convulsion | Convulsion |
| Decreased libido | Libido decreased |  |  | Migraine | Migraine |
| Delusions | Delusion |  |  | Parosmia | Parosmia |
| Euphoria | Euphoric mood |  |  | Syncope | Syncope |
| Hostility | Hostility |  |  | Tremor | Tremor |
| Fever | Pyrexia |  |  | Balance disorder | Balance disorder |
| Edema | Oedema |  |  | Cerebrovascular accident | Cerebrovascular accident |
| Chest pain | Chest pain |  |  | Dysarthria | Dysarthria |
| Electrocardiogram (ecg) | Electrocardiogram |  |  | Mental impairment | Mental impairment |
| Abnormalities (premature beats and nonspecific st-t changes) | Extrasystoles |  |  | Multiple sclerosis | Multiple sclerosis |
| Shortness of breath/dyspnea | Dyspnoea |  |  | Viith nerve paralysis | Facial paralysis |
| Flushing | Flushing |  |  | Nystagmus | Nystagmus |
| Gynecomastia | Gynaecomastia |  |  | Psychomotor hyperactivity | Psychomotor hyperactivity |
| Glycosuria | Glycosuria |  |  | Psychomotor skills impaired | Psychomotor skills impaired |
| Dysphagia | Dysphagia |  |  | Restless legs syndrome | Restless legs syndrome |
| Liver damage/jaundice | Jaundice |  |  | Sensory disturbance | Sensory disturbance |
| Intestinal perforation | Intestinal perforation |  |  | Transient ischaemic attack | Transient ischaemic attack |
| Nocturia | Nocturia |  |  | Visual field defect | Visual field defect |
| Vaginal irritation | Vulvovaginal discomfort |  |  | Dissociation | Dissociation |
| Testicular swelling | Testicular swelling |  |  | Libido decreased | Libido decreased |
| Painful erection | Painful erection |  |  | Mood swings | Mood swings |
| Retarded ejaculation | Ejaculation delayed |  |  | Thinking abnormal | Thinking abnormal |
| Enuresis | Enuresis |  |  | Bradyphrenia | Bradyphrenia |
| Urinary incontinence | Urinary incontinence |  |  | Disorientation | Disorientation |
| Ataxia | Ataxia |  |  | Euphoric mood | Euphoric mood |
| Incoordination | Coordination abnormal |  |  | Nocturia | Nocturia |
| Myoclonus | Myoclonus |  |  | Pollakiuria | Pollakiuria |
| Dyskinesia | Dyskinesia |  |  | Urine abnormality | Urine abnormality |
| Dystonia | Dystonia |  |  | Nephrolithiasis | Nephrolithiasis |
| Mydriasis | Mydriasis |  |  | Polyuria | Polyuria |
| Dysarthria | Dysarthria |  |  | Renal failure acute | Acute kidney injury |
| Electroencephalogram abnormality | Electroencephalogram abnormal |  |  | Urethral syndrome | Urethral syndrome |
| Increased libido | Libido increased |  |  | Urinary retention | Urinary retention |
| Hallucinations | Hallucination |  |  | Menstrual disorder | Menstrual disorder |
| Decrease in sexual function | Sexual function decreased |  |  | Erectile dysfunction | Erectile dysfunction |
| Depression | Depression |  |  | Sexual dysfunction | Sexual dysfunction |
| Depersonalization | Depersonalisation/derealisation disorder |  |  | Respiratory disorder | Respiratory disorder |
| Dysphoria | Dysphoria |  |  | Asthma | Asthma |
| Paranoia | Paranoia |  |  | Epistaxis | Epistaxis |
| Formal thought disorder | Formal thought disorder |  |  | Rhinitis allergic | Rhinitis allergic |
| Stomatitis | Stomatitis |  |  | Upper respiratory tract inflammation | Upper respiratory tract inflammation |
| Toothache | Toothache |  |  | Pleurisy | Pleurisy |
| Bruxism | Bruxism |  |  | Pulmonary embolism | Pulmonary embolism |
| Gum irritation | Gingival irritation |  |  | Acne | Acne |
| Oral edema | Oedema mouth |  |  | Dry skin | Dry skin |
| Bronchitis | Bronchitis |  |  | Eczema | Eczema |
| Pulmonary embolism | Pulmonary embolism |  |  | Erythema | Erythema |
| Visual disturbance | Visual impairment |  |  | Hyperhidrosis | Hyperhidrosis |
| Diplopia | Diplopia |  |  | Urticaria | Urticaria |
| Flu-like symptoms | Influenza like illness |  |  | Photosensitivity reaction | Photosensitivity reaction |
| Nonspecific pain | Pain |  |  | Psoriasis | Psoriasis |
| Overdose | Overdose |  |  | Hot flush | Hot flush |
| Anorexia | Anorexia |  |  | Thrombosis | Thrombosis |
| Myalgia | Myalgia |  |  | Irritability | Irritability |
| Twitch | Muscle twitching |  |  | Anxiety | Anxiety |
| Central nervous system stimulation | Central nervous system stimulation |  |  | Agitation | Agitation |
| Pharyngitis | Pharyngitis |  |  | Tension | Tension |
| Sinusitis | Sinusitis |  |  | Hostility | Hostility |
| Increased cough | Cough increased |  |  | Restlessness | Restlessness |
| Urticaria | Urticaria |  |  | Depressed mood | Depressed mood |
| Urinary urgency | Urinary urgency |  |  | Depression | Depression |
| Chills | Chills |  |  | Nervousness | Nervousness |
| Facial edema | Face oedema |  |  | Sneezing | Sneezing |
| Photosensitivity | Photosensitivity reaction |  |  | Cough | Cough |
| Malaise | Malaise |  |  | Throat irritation | Throat irritation |
| Postural hypotension | Orthostatic hypotension |  |  | Instillation-site irritation | Instillation site irritation |
| Stroke | Cerebrovascular accident |  |  |  |  |
| Vasodilation | Vasodilation |  |  |  |  |
| Abnormal liver function | Liver function test abnormal |  |  |  |  |
| Gastric reflux | Gastrooesophageal reflux disease |  |  |  |  |
| Gingivitis | Gingivitis |  |  |  |  |
| Increased salivation | Salivary hypersecretion |  |  |  |  |
| Mouth ulcers | Mouth ulceration |  |  |  |  |
| Edema of tongue | Tongue oedema |  |  |  |  |
| Ecchymosis | Ecchymosis |  |  |  |  |
| Peripheral edema | Peripheral oedema |  |  |  |  |
| Leg cramps | Muscle spasms |  |  |  |  |
| Emotional lability | Affect lability |  |  |  |  |
| Hyperkinesia | Hyperkinesia |  |  |  |  |
| Hypertonia | Hypertonia |  |  |  |  |
| Hypesthesia | Hypoaesthesia |  |  |  |  |
| Derealization | Derealisation |  |  |  |  |
| Bronchospasm | Bronchospasm |  |  |  |  |
| Accommodation abnormality | Accommodation disorder |  |  |  |  |
| Dry eye | Dry eye |  |  |  |  |
| Polyuria | Polyuria |  |  |  |  |
| Prostate disorder | Prostate disorder |  |  |  |  |
| Flatulence | Flatulence |  |  |  |  |
| Nasopharyngitis | Nasopharyngitis |  |  |  |  |
| Upper respiratory tract infection | Upper respiratory tract infection |  |  |  |  |
| Pain in extremity | Pain in extremity |  |  |  |  |
| Cough | Cough |  |  |  |  |
| Dysmenorrhea | Dysmenorrhoea |  |  |  |  |
| Neck pain | Neck pain |  |  |  |  |
| Allergic reaction | Hypersensitivity |  |  |  |  |
| Thinking abnormality | Thinking abnormal |  |  |  |  |
| Dry skin | Dry skin |  |  |  |  |
| Accidental injury | Accidental injury |  |  |  |  |
| Rhinitis | Rhinitis |  |  |  |  |
| Epistaxis | Epistaxis |  |  |  |  |
| Application site reaction | Application site reaction |  |  |  |  |
| Inguinal hernia | Inguinal hernia |  |  |  |  |

**e-Table 4: Risk Management Plan‑Driven Case‑by‑Case Assessment.**

| Bipolar disorder | | | | | |
| --- | --- | --- | --- | --- | --- |
| primaryid | Age | Sex | Outcome | Psychiatric Drug | Psychiatric disorders |
| 6971050 | 36 | F | OT |  |  |
| 7093395 | 54 | F | HO | Depakote;  Hydrocodone Lithium; Lorazepam; Diazepam; Promethazine W Codeine | Bipolar Disorder |
| 7266524 | 63 | F | HO | Diazepam; Amphetamine; Alprazolam; Citalopram | Anxiety; Insomnia; Depression; Attention Deficit/Hyperactivity Disorder |
| 7341778 | 59 | F | HO | Gabapentin; Elavil;  Tylenol W Codeine No 2 |  |
| 7604574 | 44 | F | HO | Alprazolam; Trazodone; Seroquel; Geodon; Acetaminophen And Hydrocodone Bitartrate; Oxycodone; Oxycodone Hcl And Acetaminophen; Prozac; Requip | Anxiety; Depression; Bipolar Disorder |
| 7606391 | 52 | M | HO | Promethazine Hcl And Codeine; Klonopin; Clonazepam; Remeron; Ambien; Ativan; Celexa; Zyprexa; | Sleep Disorder; Anxiety; Bipolar Disorder; Depression |
| 7648521 | 49 | F | HO | Elavil; Prozac | Anxiety; Depression; Bipolar Disorder |
| 8103711 | 44 | F | HO | Prozac; | Depression |
| 8267248 | 41 | F | OT |  |  |
| 8367364 | 34 | F | DS | Neurontin; |  |
| 8418921 | 51 | F | HO | Cymbalta; Paxil | Personality Disorder; Anxiety; Depression |
| 8427944 | 43 | F | HO |  |  |
| 8445791 | 50 | M | HO | Zyprexa; Seroquel; Hydrocodone Bitartrate Acetaminophen; Hydroxyzine; Citalopram | Psychotic Disorder; Schizoaffective Disorder; Depression; Post-Traumatic Stress Disorder |
| 8492434 | 53 | F | HO | Adderall 5; Cymbalta; Topamax | Depression; Bipolar Disorder; Attention Deficit/Hyperactivity Disorder |
| 85331382 | 43 | M | HO | Celexa; Oxycodone; Depakote; Desyrel; Xanax; Seroquel | Depression; Bipolar Disorder; Anxiety; Schizophrenia |
| Completed Suicide | | | | | |
| primaryid | Age | Sex | Outcome | Psychiatric Drug | Psychiatric Disorders |
| 5586471 | 53 | M | DE |  |  |
| 5671875 | 71 | M | DE |  |  |
| 5763908 | 76 | M | DE |  |  |
| 6460548 |  | M | DE |  |  |
| 6687095 | 67 | M | DE |  |  |
| 6859611 | 82 | M | DE |  |  |
| 6873888 | 56 | M | DE | Clonidine |  |
| 6941838 | 58 | M | DE |  |  |
| 6991793 | 62 | M | DE |  |  |
| 7335209 | 48 | M | DE | Sertraline; Alprazolam | Depression; Anxiety; Stress |
| 7346306 | 54 | M | DE | Gabapentin; |  |
| 7617434 | 63 | M | DE | Lorazepam | Anxiety |
| 7792529 | 51 | M | DE |  |  |
| Dependence | | | | | |
| primaryid | Age | Sex | Outcome | Psychiatric Drug | Psychiatric Disorders |
| 4908032 | 42 | F | OT | Oxycodone |  |
| 5233760 |  | F | OT | Effexor | Depression |
| 5446547 |  | F | OT |  |  |
| 7200645 | 54 | F | OT | Prozac; Compazineklonopin; Requip; Lorazepam; Buspar; Lunesta | Sleep Disorder |
| 93716532 | 56 | F |  | Clonazepam; Prozac | Anxiety; Depression |
| 230962051 |  | F |  |  | Dependence |
| Hallucination, Auditory | | | | | |
| primaryid | Age | Sex | Outcome | Psychiatric Drug | Psychiatric Disorders |
| 5852038 |  | M | OT |  |  |
| 7266524 | 63 | F | HO | Diazepam; Amphetamine; Alprazolam; Citalopram | Anxiety; Insomnia; Depression; Attention Deficit/Hyperactivity Disorder |
| 7341778 | 59 | F | HO | Gabapentin; Tylenol W Codeine No 2; Elavil; |  |
| 7382021 | 43 | F | HO | Lortab |  |
| 8445791 | 50 | M | HO | Zyprexa; Seroquel; Hydrocodone Bitartrate Acetaminophen; Hydroxyzine; Citalopram | Psychotic Disorder; Schizoaffective Disorder; Depression; Post-Traumatic Stress Disorder |
| 85331382 | 43 | M | HO | Celexa; Oxycodone; Depakote; Desyrel; Xanax; Seroquel | Depression; Bipolar Disorder; Anxiety; Schizophrenia |
| Hallucination, Visual | | | | | |
| primaryid | Age | Sex | Outcome | Psychiatric Drug | Psychiatric Disorders |
| 6976423 | 44 | F | HO | Xanax; Lamictal; Lyrica; Percocet; Adderall 10; Hydroxyzine; Ambien; Seroquel; Effexor Xr; Oxycodone Hcl And Acetaminophen; Lexapro; Restoril; Abilify; Elavil | Generalised Anxiety Disorder; Insomnia; Bipolar Disorder; Major Depression; Depression; Attention Deficit/Hyperactivity Disorder |
| 7054672 | 54 | F | OT |  |  |
| 7266524 | 63 | F | HO | Diazepam; Amphetamine; Alprazolam; Citalopram | Anxiety; Insomnia; Depression; Attention Deficit/Hyperactivity Disorder |
| 7341778 | 59 | F | HO | Gabapentin; Tylenol W Codeine No 2; Elavil; |  |
| 7382021 | 43 | F | HO | Lortab; |  |
| 7604574 | 44 | F | HO | Alprazolam; Trazodone; Seroquel; Geodon; Acetaminophen And Hydrocodone Bitartrate; Oxycodone; Oxycodone Hcl And Acetaminophen; Prozac; Requip | Anxiety; Depression; Bipolar Disorder |
| 8445791 | 50 | M | HO | Zyprexa; Seroquel; Hydrocodone Bitartrate Acetaminophen; Hydroxyzine; Citalopram | Psychotic Disorder; Schizoaffective Disorder; Depression; Post-Traumatic Stress Disorder |
| Major Depression | | | | | |
| primaryid | Age | Sex | Outcome | Psychiatric Drug | Psychiatric Disorders |
| 6887213 | 47 | M | HO |  |  |
| 6895400 | 33 | F | DS | Lortab; Fioricet; Phenergan Aventis Pharma ; Xanax | Anxietyck |
| 7057812 | 57 | M | OT |  |  |
| 7630243 | 53 | M | HO | Hydrocodone; Buspar; Prozac | Anxiety; Depression |
| 7804081 | 54 | M | OT | Cymbalta; Seroquel | Mental Disorder |
| 8103711 | 44 | F | HO | Prozac; | Depression |
| Schizophrenia | | | | | |
| primaryid | Age | Sex | Outcome | Psychiatric Drug | Psychiatric Disorders |
| 7341778 | 59 | F | HO | Gabapentin; Tylenol W Codeine No 2; Elavil; |  |
| 7639711 | 51 | F | OT | Tramadol; Gabapentin; Propoxyphene Hydrochloride |  |
| 85331382 | 43 | M | HO | Celexa; Oxycodone; Depakote; Desyrel; Xanax; Seroquel | Depression; Bipolar Disorder; Anxiety; Schizophrenia |
| Suicide Attempt | | | | | |
| primaryid | Age | Sex | Outcome | Psychiatric Drug | Psychiatric Disorders |
| 6860138 | 60 | F | HO | Zoloft | Depression |
| 6871385 | 59 | F | HO | Lexapro | Depression |
| 6872498 | 53 | F | LT | Lexapro; Lamictal; Klonopin |  |
| 6887213 | 47 | M | HO |  |  |
| 6895400 | 33 | F | DS | Lortab; Fioricet; Phenergan Aventis Pharma ; Xanax | Anxiety |
| 6976607 | 40 | M | HO | Lortab |  |
| 7034890 | 61 | M | HO | Nitroglycerin; Acetaminophen And Hydrocodone Bitartrate |  |
| 7068747 | 50 | F | HO | Hydrocodone; Lyrica |  |
| 7084290 | 42 | F | HO | Seroquel | Depression; Anxiety |
| 7093395 | 54 | F | HO | Depakote; Acetaminophen And Hydrocodone Bitartrate; Lithium; Lorazepam; Diazepam; Promethazine W Codeine | Bipolar Disorder; Anxiety |
| 7124028 | 52 | F | HO | Oxycodone; Gabapentin; Morphine Sulfate; Diazepam; Neurontin | Anxiety |
| 7150041 |  | M | OT |  |  |
| 7266018 | 59 | F | HO | Depakote; Cymbalta; Paxil; Darvocet N 100; Librax; Lortab | Anxiety; Depression |
| 7289063 | 59 | F | HO | Zoloft; Tramadol; Xanax | Depression |
| 7294160 | 42 | F | HO | Oxycodone; |  |
| 7324076 | 55 | F | HO |  |  |
| 7382021 | 43 | F | HO | Lortab; |  |
| 7406944 | 39 | F | HO | Hydrocodone; Ativan; Cymbalta | Depression; Anxiety |
| 7416211 | 55 | M | HO | Zoloft; Prozac; Morphine; Clonazepam; Ambien | Depression; Anxiety; Insomnia |
| 7459348 | 51 | F | HO | Neurontin; Tramadol; Cymbalta; Klonopin | Anxiety; Depression |
| 7460497 | 57 | F | HO | Elavil; Vicodin; Ativan; | Sleep Disorder; Depression; Anxiety |
| 7463160 | 44 | M | HO | Vicodin; Hydrocodone |  |
| 7468014 | 37 | M | HO | Hydrocodone Acetaminophen W Codeine |  |
| 7591042 | 69 | F | HO | Clonazepam; Lamotrigine; Fentanyl; Promethazine; Hydrocodone | Anxiety; Depression |
| 7594004 | 48 | F | OT | Topamax; Amitriptyline; Tramadol; Paxil | Depression |
| 7604574 | 44 | F | HO | Alprazolam; Trazodone; Seroquel; Geodon; Acetaminophen And Hydrocodone Bitartrate; Oxycodone; Oxycodone Hcl And Acetaminophen; Prozac; Requip | Anxiety; Depression; Bipolar Disorder; |
| 7606391 | 52 | M | HO | Promethazine Hcl And Codeine; Klonopin; Clonazepam; Remeron; Ambien; Ativan; Celexa; Zyprexa | Sleep Disorder; Anxiety; Infection; Bipolar Disorder; Pain; Depression |
| 7627596 | 59 | F | HO | Butalbital; Valium; Prozac; Promethazine; Hydrocodone | Depression; Anxiety |
| 7639711 | 51 | F | OT | Tramadol; Tylenol 500; Gabapentin; Propoxyphene Hydrochloride |  |
| 7648521 | 49 | F | HO | Elavil; Prozac | Anxiety; Depression; Bipolar Disorder |
| 7649661 | 43 | M | HO |  |  |
| 7804081 | 54 | M | OT | Cymbalta; Seroquel | Mental Disorder |
| 7806683 | 52 | M | HO | Zoloft | Anxiety; Depression |
| 7807332 | 60 | F | OT | Acetaminophen And Hydrocodone Bitartrate; Zoloft; Valium; | Depression; Anxiety |
| 7888725 | 45 | F | HO |  |  |
| 7893214 | 41 | F | HO | Xanax; Zoloft; Hydrocodone; Topamax | Anxiety; Depression; Mood Swings; |
| 7909407 | 50 | F | HO | Sinemet; Paxil | Depression |
| 8091625 | 43 | F | HO |  |  |
| 8103711 | 44 | F | HO | Prozac; | Depression |
| 8124750 | 60 | F | HO | Requip; Lyrica; Paxil; Lexapro | Depression |
| 8125473 | 62 | M | HO | Fluoxetine | Depression; Anxiety |
| 8127228 | 54 | F | HO | Effexor; Ambien; Seroquel; Requip | Depression; Sleep Disorder; Anxiety |
| 8418921 | 51 | F | HO | Cymbalta; Paxil | Personality Disorder; Anxiety; Depression |
| 8427944 | 43 | F | HO |  |  |
| 8445791 | 50 | M | HO | Zyprexa; Seroquel; Hydrocodone Bitartrate Acetaminophen; Hydroxyzine; Citalopram | Psychotic Disorder; Insomnia; Schizoaffective Disorder; Depression; Post-Traumatic Stress Disorder |
| 8484982 | 56 | M | HO | Neurontin; Hydrocodone |  |
| 8489608 | 46 | M | HO | Hydrocodone; Effexor Xr; Lexapro; Valium | Anxiety; Depression |
| 8492434 | 53 | F | HO | Adderall 5; Cymbalta; Topamax | Depression; Bipolar Disorder; Attention Deficit/Hyperactivity Disorder |
| 85331382 | 43 | M | HO | Celexa; Oxycodone; Depakote; Desyrel; Xanax; Seroquel | Depression; Bipolar Disorder; Anxiety; Schizophrenia |
| 87652183 | 53 | F | HO | Fentanyl |  |

|  |  |  |  |  | psychiatric-type disorders case summary |  |  |
| --- | --- | --- | --- | --- | --- | --- | --- |
| primaryid | Age | Sex | Outcome | Psychiatric Drug | Psychiatric disorders | AE | AE num |
| 7807332 | 60 | F | OT | Acetaminophen And Hydrocodone Bitartrate; Zoloft; Valium; | Depression; Anxiety | Suicide Attempt | 1 |
| 8492434 | 53 | F | HO | Adderall 5; Cymbalta; Topamax | Depression; Bipolar Disorder; Attention Deficit/Hyperactivity Disorder | Bipolar disorder；Suicide Attempt | 2 |
| 7604574 | 44 | F | HO | Alprazolam; Trazodone; Seroquel; Geodon; Acetaminophen And Hydrocodone Bitartrate; Oxycodone; Oxycodone Hcl And Acetaminophen; Prozac; Requip | Anxiety; Depression; Bipolar Disorder | Bipolar disorder；Suicide Attempt；Hallucination, Visual | 3 |
| 7627596 | 59 | F | HO | Butalbital; Valium; Prozac; Promethazine; Hydrocodone | Depression; Anxiety | Suicide Attempt | 1 |
| 85331382 | 43 | M | HO | Celexa; Oxycodone; Depakote; Desyrel; Xanax; Seroquel | Depression; Bipolar Disorder; Anxiety; Schizophrenia | Bipolar disorder；Hallucination, Auditory；Schizophrenia；Suicide Attempt | 4 |
| 7591042 | 69 | F | HO | Clonazepam; Lamotrigine; Fentanyl; Promethazine; Hydrocodone | Anxiety; Depression | Suicide Attempt | 1 |
| 93716532 | 56 | F |  | Clonazepam; Prozac | Anxiety; Depression | Dependence | 1 |
| 6873888 | 56 | M | DE | Clonidine |  | Completed Suicide | 1 |
| 8418921 | 51 | F | HO | Cymbalta; Paxil | Personality Disorder; Anxiety; Depression | Bipolar disorder；Suicide Attempt | 2 |
| 7804081 | 54 | M | OT | Cymbalta; Seroquel | Mental Disorder | Major Depression；Suicide Attempt | 2 |
| 7093395 | 54 | F | HO | Depakote; Acetaminophen And Hydrocodone Bitartrate; Lithium; Lorazepam; Diazepam; Promethazine W Codeine | Bipolar Disorder; Anxiety | Bipolar disorder;Suicide Attempt | 2 |
| 7266018 | 59 | F | HO | Depakote; Cymbalta; Paxil; Darvocet N 100; Librax; Lortab | Anxiety; Depression | Suicide Attempt | 1 |
| 7266524 | 63 | F | HO | Diazepam; Amphetamine; Alprazolam; Citalopram | Anxiety; Insomnia; Depression; Attention Deficit/Hyperactivity Disorder | Bipolar disorder；Hallucination, Auditory；Hallucination, Visual | 3 |
| 5233760 |  | F | OT | Effexor | Depression | Dependence | 1 |
| 8127228 | 54 | F | HO | Effexor; Ambien; Seroquel; Requip | Depression; Sleep Disorder; Anxiety | Suicide Attempt | 1 |
| 7648521 | 49 | F | HO | Elavil; Prozac | Anxiety; Depression; Bipolar Disorder | Bipolar disorder；Suicide Attempt | 2 |
| 7460497 | 57 | F | HO | Elavil; Vicodin; Ativan; | Sleep Disorder; Depression; Anxiety | Suicide Attempt | 1 |
| 8125473 | 62 | M | HO | Fluoxetine | Depression; Anxiety | Suicide Attempt | 1 |
| 7346306 | 54 | M | DE | Gabapentin; |  | Completed Suicide | 1 |
| 7341778 | 59 | F | HO | Gabapentin; Tylenol W Codeine No 2; Elavil; |  | Bipolar disorder；Schizophrenia；Hallucination, Auditory；Hallucination, Visual | 4 |
| 7468014 | 37 | M | HO | Hydrocodone Acetaminophen W Codeine |  | Suicide Attempt | 1 |
| 7406944 | 39 | F | HO | Hydrocodone; Ativan; Cymbalta | Depression; Anxiety | Suicide Attempt | 1 |
| 7630243 | 53 | M | HO | Hydrocodone; Buspar; Prozac | Anxiety; Depression | Major Depression | 1 |
| 8489608 | 46 | M | HO | Hydrocodone; Effexor Xr; Lexapro; Valium | Anxiety; Depression | Suicide Attempt | 1 |
| 7068747 | 50 | F | HO | Hydrocodone; Lyrica |  | Suicide Attempt | 1 |
| 6871385 | 59 | F | HO | Lexapro | Depression | Suicide Attempt | 1 |
| 6872498 | 53 | F | LT | Lexapro; Lamictal; Klonopin |  | Suicide Attempt | 1 |
| 7617434 | 63 | M | DE | Lorazepam | Anxiety | Completed Suicide | 1 |
| 7382021 | 43 | F | HO | Lortab |  | Hallucination, Auditory；Hallucination, Visual；Suicide Attempt | 3 |
| 6976607 | 40 | M | HO | Lortab |  | Suicide Attempt | 1 |
| 6895400 | 33 | F | DS | Lortab; Fioricet; Phenergan Aventis Pharma ; Xanax | Anxietyck | Major Depression；Suicide Attempt | 2 |
| 8367364 | 34 | F | DS | Neurontin; |  | Bipolar disorder | 1 |
| 8484982 | 56 | M | HO | Neurontin; Hydrocodone |  | Suicide Attempt | 1 |
| 7459348 | 51 | F | HO | Neurontin; Tramadol; Cymbalta; Klonopin | Anxiety; Depression | Suicide Attempt | 1 |
| 7034890 | 61 | M | HO | Nitroglycerin; Acetaminophen And Hydrocodone Bitartrate |  | Suicide Attempt | 1 |
| 4908032 | 42 | F | OT | Oxycodone |  | Dependence | 1 |
| 7294160 | 42 | F | HO | Oxycodone; |  | Suicide Attempt | 1 |
| 7124028 | 52 | F | HO | Oxycodone; Gabapentin; Morphine Sulfate; Diazepam; Neurontin | Anxiety | Suicide Attempt | 1 |
| 7606391 | 52 | M | HO | Promethazine Hcl And Codeine; Klonopin; Clonazepam; Remeron; Ambien; Ativan; Celexa; Zyprexa; | Sleep Disorder; Anxiety; Infection; Bipolar Disorder; Pain; Depression | Bipolar disorder；Suicide Attempt | 2 |
| 8103711 | 44 | F | HO | Prozac; | Depression | Bipolar disorder；Major Depression；Suicide Attempt | 3 |
| 7200645 | 54 | F | OT | Prozac; Compazineklonopin; Requip; Lorazepam; Buspar; Lunesta | Sleep Disorder | Dependence | 1 |
| 8124750 | 60 | F | HO | Requip; Lyrica; Paxil; Lexapro | Depression | Suicide Attempt | 1 |
| 7084290 | 42 | F | HO | Seroquel | Depression; Anxiety | Suicide Attempt | 1 |
| 7335209 | 48 | M | DE | Sertraline; Alprazolam | Depression; Anxiety; Stress | Completed Suicide | 1 |
| 7909407 | 50 | F | HO | Sinemet; Paxil | Depression | Suicide Attempt | 1 |
| 7594004 | 48 | F | OT | Topamax; Amitriptyline; Tramadol; Paxil | Depression | Suicide Attempt | 1 |
| 7639711 | 51 | F | OT | Tramadol; Gabapentin; Propoxyphene Hydrochloride |  | Schizophrenia；Suicide Attempt | 2 |
| 7463160 | 44 | M | HO | Vicodin; Hydrocodone |  | Suicide Attempt | 1 |
| 6976423 | 44 | F | HO | Xanax; Lamictal; Lyrica; Percocet; Adderall 10; Hydroxyzine; Ambien; Seroquel; Effexor Xr; Oxycodone Hcl And Acetaminophen; Lexapro; Restoril; Abilify; Elavil | Generalised Anxiety Disorder; Insomnia; Bipolar Disorder; Major Depression; Depression; Attention Deficit/Hyperactivity Disorder | Hallucination, Visual | 1 |
| 7893214 | 41 | F | HO | Xanax; Zoloft; Hydrocodone; Topamax | Anxiety; Depression; Mood Swings; | Suicide Attempt | 1 |
| 6860138 | 60 | F | HO | Zoloft | Depression | Suicide Attempt | 1 |
| 7806683 | 52 | M | HO | Zoloft | Anxiety; Depression | Suicide Attempt | 1 |
| 7289063 | 59 | F | HO | Zoloft; Tramadol; Xanax | Depression | Suicide Attempt | 1 |
| 7416211 | 55 | M | HO | Zoloft; Prozac; Morphine; Clonazepam; Ambien | Depression; Anxiety; Insomnia | Suicide Attempt | 1 |
| 8445791 | 50 | M | HO | Zyprexa; Seroquel; Hydrocodone Bitartrate Acetaminophen; Hydroxyzine; Citalopram | Psychotic Disorder; Schizoaffective Disorder; Depression; Post-Traumatic Stress Disorder | Bipolar disorder；Hallucination, Auditory；Hallucination, Visual；Suicide Attempt | 4 |
| 6971050 | 36 | F | OT |  |  | Bipolar disorder | 1 |
| 8267248 | 41 | F | OT |  |  | Bipolar disorder | 1 |
| 8427944 | 43 | F | HO |  |  | Bipolar disorder；Suicide Attempt | 2 |
| 5586471 | 53 | M | DE |  |  | Completed Suicide | 1 |
| 5671875 | 71 | M | DE |  |  | Completed Suicide | 1 |
| 5763908 | 76 | M | DE |  |  | Completed Suicide | 1 |
| 6460548 |  | M | DE |  |  | Completed Suicide | 1 |
| 6687095 | 67 | M | DE |  |  | Completed Suicide | 1 |
| 6859611 | 82 | M | DE |  |  | Completed Suicide | 1 |
| 6941838 | 58 | M | DE |  |  | Completed Suicide | 1 |
| 6991793 | 62 | M | DE |  |  | Completed Suicide | 1 |
| 7792529 | 51 | M | DE |  |  | Completed Suicide | 1 |
| 5446547 |  | F | OT |  |  | Dependence | 1 |
| 230962051 |  | F |  |  | Dependence | Dependence | 1 |
| 5852038 |  | M | OT |  |  | Hallucination, Auditory | 1 |
| 7054672 | 54 | F | OT |  |  | Hallucination, Visual | 1 |
| 6887213 | 47 | M | HO |  |  | Major Depression；Suicide Attempt | 2 |
| 7057812 | 57 | M | OT |  |  | Major Depression | 1 |
| 7150041 |  | M | OT |  |  | Suicide Attempt | 1 |
| 7324076 | 55 | F | HO |  |  | Suicide Attempt | 1 |
| 7649661 | 43 | M | HO |  |  | Suicide Attempt | 1 |
| 7888725 | 45 | F | HO |  |  | Suicide Attempt | 1 |
| 8091625 | 43 | F | HO |  |  | Suicide Attempt | 1 |

DE, Death; LT, Life-Threatening; HO, Hospitalization; DS, Disability; CA, Congenital Anomaly; RI, Required Intervention to Prevent Permanent Impairment/Damage; OT, Other Serious (Important Medical Event); AE, Adverse event.
